# Supplementary material for: Vertical Flux of Microplastics in the Deep Subtropical Pacific Ocean: Moored Sediment-Trap Observations within the Kuroshio Extension Recirculation Gyre
Source: PubMed Central journal article supplement (PMC11394010; doi:10.1021/acs.est.4c02212), 2024-08-26
Supplement: es4c02212_si_001.pdf [file es4c02212_si_001.pdf]

Supporting Information

for

**Vertical flux of microplastics in the deep subtropical Pacific  
Ocean: moored sediment-trap observations within the Kuroshio  
Extension recirculation gyre**

Takahito Ikenoue<sup>a\*</sup>; Ryota Nakajima<sup>a</sup>; Satoshi Osafune<sup>a</sup>; Eko Siswanto<sup>a</sup>; Makio C.  
Honda<sup>a</sup>

<sup>a</sup> Research Institute for Global Change, Japan Agency for Marine-Earth Science and  
Technology (JAMSTEC), 2-15 Natsushima-cho, Yokosuka 237-0061, Japan

\* Corresponding author: [ikenouet@jamstec.go.jp](mailto:ikenouet@jamstec.go.jp)

This PDF file includes:

Note S1 (pages S2–S3), Note S2 (pages S4)

Tables S1 (page S5), S2 (page S6), S3 (page S7), S4 (pages S8–S11), S5 (pages S12–  
S29), S6 (pages S30–S32), S7 (page S33), S8 (pages S34–S42), S9 (page S43), S10  
(page S44), S11 (page S45), S12 (page S46), S13 (page S47), S14 (pages S48–S58),  
S15 (page S59), and S16 (pages S60–S61)

Figures S1 to S5 (pages S62–S66)

SI References (page S67)

## Note S1

### Field sampling

A time-series sediment trap (Mark VII-21; McLane, East Falmouth, MA) with 21 sampling bottles was installed and used to collect sinking particles at a depth of approximately 4900 m (1000 m above the seafloor) at Station (Stn.) KEO (32°22'N, 144°25'E; depth 5900 m) located in the KERG (Fig. 1). The Kuroshio Extension Observatory (KEO) time-series station was established in 2004 by Pacific Marine Environmental Laboratory (PMEL) of National Oceanic and Atmospheric Administration (NOAA) with the deployment of a surface mooring (<https://www.pmel.noaa.gov/ocs/data/disdel/>). The sampling bottles were made of high-density polyethylene and had a capacity of 250 mL. The sediment-trap body consisted of a polyethylene cone and a polycarbonate baffle. The sediment-trap mooring system was first deployed from aboard R/V *Kaiyo* in June 2014, followed by M/V *Bluefin* in September 2015, T/S *Shinsei-maru* in July 2016, and T/S *Hakuho-maru* in November 2017. The openings of the sediment traps were covered until just prior to deployment to prevent contamination by MPs from the atmosphere. Sampling intervals (sampling period per sampling bottle) ranged from 18 to 21 days. Sampling bottles were washed and dried with dilute hydrochloric acid and Milli-Q water. Neutralized formalin deep-sea water (final conc. 10%) was filtered through Gelman membrane filters with a nominal pore size of 0.45  $\mu\text{m}$  and sampling bottles were filled with the pre-filtered neutralized formalin deep-sea water before deployment. The salinity was adjusted to approximately 39 by the addition of NaCl (50 g of NaCl to 10 L of seawater). The initial pH of the solution was about 8.1. After recovery of the sediment traps, the samples were stored in a refrigerator at 4 °C until analysis in a land-based laboratory. In the laboratory, the collected sinking particles were sieved through a 1-mm nylon mesh and any remaining swimmers of size <1 mm were removed with tweezers. The <1-mm fraction of the sediment-trap samples were divided into 10 equal 50-mL polypropylene cylinders for each analysis using a wet sample divider (WSD-10; McLane) and pre-filtered neutralized formalin sea water (the same as that in the sampling bottles). In this study, chemical and MP analyses were performed on the <1-mm fractions of 41 sediment-trap samples collected from 1 July 2014 to 2 October 2016.

Sea surface temperature (SST) (°C) and mixed layer depth (MLD) (m) around KEO (32°N–33°N, 144°E–145°E) were obtained from Copernicus Marine Service (CMEMS) (<https://data.marine.copernicus.eu/products>, accessed 29 January 2024). Sea surface chlorophyll-*a* concentration (Chl-*a*) ( $\text{mg m}^{-3}$ ) and contemporaneous SST (°C), photosynthetically active radiation (Einstein  $\text{m}^{-2} \text{d}^{-1}$ ), depth of euphotic zone (m), and day lengths were obtained from the Moderate Resolution Imaging Spectroradiometer onboard Satellite Aqua provided by the Ocean Biology Processing Group at the National Aeronautics and Space Administration Goddard Space Flight Center (<https://oceancolor.gsfc.nasa.gov>, accessed 29 January 2024). Eight-day mean chlorophyll-*a* concentrations were calculated for a  $4^\circ \times 4^\circ$  square centered at Stn. KEO. Primary productivity data

(mg-C m<sup>-2</sup> day<sup>-1</sup>) estimated using the Vertically Generalized Production Model<sup>1</sup> were obtained from the Ocean Productivity website provided by Oregon State University ([http://orca.science.oregonstate.edu/npp\\_products.php](http://orca.science.oregonstate.edu/npp_products.php), accessed 29 January 2024). Gridded sea surface height anomaly data (SSHA; m) with a spatial resolution of 0.25° for both longitude and latitude based on multiple satellite altimeters were also obtained from CMEMS to serve as an indicator of the passage of cyclonic eddies around Stn. KEO. Annual mean absolute dynamic topography with the same spatial resolution was derived from sea surface height data obtained from CMEMS to determine the positional relationship between Stn. KEO and the KERG during the sampling period.

**Note S2****Recovery test**

To test the possibility that MPs were lost during the procedure described in section 2.3 from purification with hydrogen peroxide to dilution with distilled water to a volume of 50 mL for use in MP analysis, the MPs recovery was examined. One hundred pink-colored polyethylene particles of size 150-180  $\mu\text{m}$  (Cospheric Product ID# PNKPMS-1.00) were added to 200 ml of Milli Q water as a standard sample. The recovery test was conducted five times and  $\mu\text{FT-IR}$  identification showed that a mean of 94.6% of the MPs were recovered, indicating that the analytical procedure used in this study was valid. The results of the individual recovery tests are summarized in Table S3.

Table S1. Theoretical density and chemical formulas of polymer types

| Polymer type                                    | Chemical formula                                                                              | Carbon portion | Density (g/cm <sup>3</sup> ) |         |           | Polymer category | Reference                                     |
|-------------------------------------------------|-----------------------------------------------------------------------------------------------|----------------|------------------------------|---------|-----------|------------------|-----------------------------------------------|
|                                                 |                                                                                               |                | Minimum                      | Maximum | Mid-range |                  |                                               |
| Acrylonitrile-butadiene-styrene copolymer (ABS) | C <sub>8</sub> H <sub>8</sub> .C <sub>4</sub> H <sub>6</sub> .C <sub>3</sub> H <sub>3</sub> N | 85.3           | 1.02                         | 1.21    | 1.12      | Dense            | Omnexus <sup>2</sup>                          |
| Epoxy resin (EP)                                | C <sub>21</sub> H <sub>25</sub> ClO <sub>5</sub>                                              | 64.2           | 1.10                         | 1.50    | 1.30      | Dense            | Resin Library <sup>3</sup>                    |
| Ethylene-vinylacetate copolymer (EVA)           | C <sub>4</sub> H <sub>6</sub> O <sub>2</sub> .C <sub>2</sub> H <sub>4</sub>                   | 63.1           | 0.92                         | 0.94    | 0.93      | Buoyant          | Omnexus <sup>2</sup>                          |
| Ethylene-vinylalcohol copolymer (EVOH)          | C <sub>2</sub> H <sub>4</sub> O.C <sub>2</sub> H <sub>4</sub>                                 | 66.6           | 1.10                         | 1.20    | 1.15      | Dense            | Omnexus <sup>2</sup>                          |
| Polyamide (PA)                                  | C <sub>12</sub> H <sub>22</sub> N <sub>2</sub> O <sub>2</sub>                                 | 63.7           | 1.13                         | 1.15    | 1.14      | Dense            | Omnexus <sup>2</sup>                          |
| Poly (butylene terephthalate) (PBT)             | C <sub>12</sub> H <sub>12</sub> O <sub>4</sub>                                                | 65.4           | 1.30                         | 1.40    | 1.35      | Dense            | Omnexus <sup>2</sup>                          |
| Polycarbonate (PC)                              | C <sub>16</sub> H <sub>18</sub> O <sub>5</sub>                                                | 66.2           | 1.15                         | 1.52    | 1.34      | Dense            | Omnexus <sup>2</sup>                          |
| Polyethylene (PE)                               | C <sub>2</sub> H <sub>4</sub>                                                                 | 85.6           | 0.92                         | 0.97    | 0.94      | Buoyant          | Omnexus <sup>2</sup>                          |
| Ethylene/propylene copolymer (PE/PP)            | C <sub>2</sub> H <sub>4</sub> .C <sub>3</sub> H <sub>6</sub>                                  | 85.6           | 0.86                         | 0.86    | 0.86      | Buoyant          | Scientific Polymer Products Inc. <sup>4</sup> |
| Poly (ethylene terephthalate) (PET)             | C <sub>10</sub> H <sub>8</sub> O <sub>4</sub>                                                 | 62.5           | 1.30                         | 1.40    | 1.35      | Dense            | Omnexus <sup>2</sup>                          |
| Poly (methyl methacrylate) (PMMA)               | C <sub>8</sub> H <sub>8</sub> .C <sub>4</sub> H <sub>6</sub> .C <sub>3</sub> H <sub>3</sub> N | 85.3           | 1.17                         | 1.20    | 1.19      | Dense            | Omnexus <sup>2</sup>                          |
| Poly (methyl pentene) (PMP)                     | C <sub>6</sub> H <sub>12</sub>                                                                | 85.6           | 0.84                         | 0.84    | 0.84      | Buoyant          | Omnexus <sup>2</sup>                          |
| Polyoxymethylene (POM)                          | CH <sub>2</sub> O                                                                             | 40.0           | 1.41                         | 1.42    | 1.42      | Dense            | Omnexus <sup>2</sup>                          |
| Polypropylene (PP)                              | C <sub>3</sub> H <sub>6</sub>                                                                 | 85.6           | 0.90                         | 0.91    | 0.91      | Buoyant          | Omnexus <sup>2</sup>                          |
| Polystyrene (PS)                                | C <sub>8</sub> H <sub>8</sub>                                                                 | 92.3           | 1.04                         | 1.05    | 1.05      | Dense            | Omnexus <sup>2</sup>                          |
| Polytetrafluoroethylene (PTFE)                  | C <sub>2</sub> F <sub>4</sub>                                                                 | 24.0           | 2.10                         | 2.20    | 2.15      | Dense            | Omnexus <sup>2</sup>                          |
| Polyurethane (PU)                               | C <sub>3</sub> H <sub>8</sub> N <sub>2</sub> O                                                | 40.9           | 1.11                         | 1.24    | 1.18      | Dense            | Ji-Horng Plastic <sup>5</sup>                 |
| Poly (vinyl chloride) (PVC)                     | C <sub>2</sub> H <sub>3</sub> Cl                                                              | 38.4           | 1.15                         | 1.70    | 1.43      | Dense            | Omnexus <sup>2</sup>                          |
| Vinyl chloride-vinyl acetate copolymers (VC/VA) | C <sub>2</sub> H <sub>3</sub> Cl.C <sub>4</sub> H <sub>6</sub> O <sub>2</sub>                 | 48.5           | 1.33                         | 1.37    | 1.35      | Dense            | Scientific Polymer Products Inc. <sup>4</sup> |

Table S2. List of blanks

| Blanks  | Remarks                                                                                                                                                                                                                                                                                                                                                                                                           |
|---------|-------------------------------------------------------------------------------------------------------------------------------------------------------------------------------------------------------------------------------------------------------------------------------------------------------------------------------------------------------------------------------------------------------------------|
| Blank A | 400 mL of prefiltered neutralized formalin sea water collected at a depth of 2000 m at Stn. K2 (47°N, 160°E) on 3 December 2020 during cruise MR20-E02 and analyzed after 869 days of cold storage in a polyethylene container. This allowed us to reproduce the MPs generated by the sampling bottle during the mooring period and those that might have been present in the seawater used for sample splitting. |
| Blank B | 50 mL of Milli Q water.                                                                                                                                                                                                                                                                                                                                                                                           |

Table S3. Recovery rate

| Run                    | Recovered/used particles. |
|------------------------|---------------------------|
| 1                      | 92/100                    |
| 2                      | 94/100                    |
| 3                      | 96/100                    |
| 4                      | 91/100                    |
| 5                      | 100/100                   |
| Mean recovery rate (%) | 94.6                      |

Table S4. Sea surface temperature (SST) and mixed layer depth (MLD) around stn. KEO (144°E–145°E, 32°N–33°N) obtained from the Copernicus Marine Service

| Date       | MLD (m) | SST (°C) |
|------------|---------|----------|
| 2014/7/2   | 13      | 23.6     |
| 2014/7/9   | 13      | 23.2     |
| 2014/7/16  | 12      | 24.2     |
| 2014/7/23  | 11      | 25.0     |
| 2014/7/30  | 11      | 26.0     |
| 2014/8/6   | 11      | 28.2     |
| 2014/8/13  | 11      | 27.5     |
| 2014/8/20  | 12      | 28.5     |
| 2014/8/27  | 12      | 28.3     |
| 2014/9/3   | 12      | 27.9     |
| 2014/9/10  | 16      | 25.4     |
| 2014/9/17  | 31      | 25.7     |
| 2014/9/24  | 31      | 25.3     |
| 2014/10/1  | 31      | 24.4     |
| 2014/10/8  | 35      | 25.2     |
| 2014/10/15 | 44      | 24.0     |
| 2014/10/22 | 51      | 24.1     |
| 2014/10/29 | 44      | 23.8     |
| 2014/11/5  | 39      | 23.7     |
| 2014/11/12 | 46      | 22.9     |
| 2014/11/19 | 50      | 22.3     |
| 2014/11/26 | 52      | 22.1     |
| 2014/12/3  | 62      | 21.5     |
| 2014/12/10 | 70      | 21.0     |
| 2014/12/17 | 108     | 20.1     |
| 2014/12/24 | 133     | 19.8     |
| 2015/1/1   | 151     | 19.4     |
| 2015/1/8   | 179     | 19.0     |
| 2015/1/15  | 223     | 18.6     |
| 2015/1/22  | 218     | 18.3     |
| 2015/1/29  | 265     | 17.3     |
| 2015/2/5   | 231     | 17.3     |



|            |     |      |
|------------|-----|------|
| 2015/2/12  | 174 | 17.3 |
| 2015/2/19  | 166 | 17.4 |
| 2015/2/26  | 207 | 17.3 |
| 2015/3/5   | 160 | 16.7 |
| 2015/3/12  | 134 | 16.7 |
| 2015/3/19  | 56  | 17.3 |
| 2015/3/26  | 61  | 17.2 |
| 2015/4/2   | 20  | 17.6 |
| 2015/4/9   | 20  | 18.9 |
| 2015/4/16  | 16  | 19.7 |
| 2015/4/23  | 14  | 19.8 |
| 2015/4/30  | 15  | 21.2 |
| 2015/5/7   | 26  | 21.5 |
| 2015/5/14  | 29  | 21.4 |
| 2015/5/21  | 17  | 21.4 |
| 2015/5/28  | 16  | 21.4 |
| 2015/6/4   | 20  | 21.8 |
| 2015/6/11  | 18  | 22.4 |
| 2015/6/18  | 19  | 23.0 |
| 2015/6/25  | 24  | 23.4 |
| 2015/7/2   | 32  | 23.4 |
| 2015/7/9   | 30  | 26.7 |
| 2015/7/16  | 11  | 26.3 |
| 2015/7/23  | 12  | 27.9 |
| 2015/7/30  | 12  | 27.5 |
| 2015/8/6   | 12  | 28.6 |
| 2015/8/13  | 12  | 26.5 |
| 2015/8/20  | 14  | 27.4 |
| 2015/8/27  | 18  | 25.9 |
| 2015/9/3   | 33  | 27.0 |
| 2015/9/10  | 32  | 27.6 |
| 2015/9/17  | 29  | 27.6 |
| 2015/9/24  | 30  | 27.3 |
| 2015/10/1  | 32  | 26.8 |
| 2015/10/8  | 41  | 25.2 |
| 2015/10/15 | 52  | 24.9 |

|            |     |      |
|------------|-----|------|
| 2015/10/22 | 53  | 24.5 |
| 2015/10/29 | 45  | 24.1 |
| 2015/11/5  | 38  | 23.6 |
| 2015/11/12 | 49  | 23.6 |
| 2015/11/19 | 60  | 23.9 |
| 2015/11/26 | 74  | 23.2 |
| 2015/12/3  | 37  | 22.2 |
| 2015/12/10 | 57  | 21.7 |
| 2015/12/17 | 73  | 22.1 |
| 2015/12/24 | 52  | 21.0 |
| 2016/1/1   | 116 | 20.4 |
| 2016/1/8   | 135 | 20.6 |
| 2016/1/15  | 134 | 19.7 |
| 2016/1/22  | 155 | 18.9 |
| 2016/1/29  | 156 | 18.5 |
| 2016/2/5   | 138 | 18.6 |
| 2016/2/12  | 140 | 18.9 |
| 2016/2/19  | 163 | 18.7 |
| 2016/2/26  | 138 | 18.5 |
| 2016/3/4   | 141 | 18.3 |
| 2016/3/11  | 64  | 18.6 |
| 2016/3/18  | 172 | 18.5 |
| 2016/3/25  | 204 | 18.9 |
| 2016/4/1   | 143 | 18.2 |
| 2016/4/8   | 274 | 18.3 |
| 2016/4/15  | 31  | 19.0 |
| 2016/4/22  | 114 | 19.3 |
| 2016/4/29  | 25  | 19.9 |
| 2016/5/6   | 23  | 20.2 |
| 2016/5/13  | 24  | 19.6 |
| 2016/5/20  | 15  | 20.3 |
| 2016/5/27  | 23  | 21.6 |
| 2016/6/3   | 18  | 22.5 |
| 2016/6/10  | 23  | 22.5 |
| 2016/6/17  | 25  | 23.2 |
| 2016/6/24  | 21  | 23.5 |

|           |    |      |
|-----------|----|------|
| 2016/7/1  | 16 | 23.9 |
| 2016/7/8  | 13 | 25.6 |
| 2016/7/15 | 12 | 25.6 |
| 2016/7/22 | 11 | 26.5 |
| 2016/7/29 | 12 | 26.7 |
| 2016/8/5  | 13 | 26.9 |
| 2016/8/12 | 16 | 26.3 |
| 2016/8/19 | 22 | 26.0 |
| 2016/8/26 | 30 | 27.1 |
| 2016/9/2  | 24 | 27.6 |
| 2016/9/9  | 13 | 27.4 |
| 2016/9/16 | 15 | 27.9 |
| 2016/9/23 | 23 | 28.2 |
| 2016/9/30 | 24 | 27.9 |

---

Table S5. Sea surface height anomaly around Stn. KEO

| Date      | SSHA (m) |
|-----------|----------|
| 2014/7/1  | 0.05     |
| 2014/7/2  | 0.02     |
| 2014/7/3  | -0.01    |
| 2014/7/4  | -0.04    |
| 2014/7/5  | -0.07    |
| 2014/7/6  | -0.11    |
| 2014/7/7  | -0.14    |
| 2014/7/8  | -0.17    |
| 2014/7/9  | -0.20    |
| 2014/7/10 | -0.22    |
| 2014/7/11 | -0.25    |
| 2014/7/12 | -0.27    |
| 2014/7/13 | -0.30    |
| 2014/7/14 | -0.32    |
| 2014/7/15 | -0.35    |
| 2014/7/16 | -0.36    |
| 2014/7/17 | -0.38    |
| 2014/7/18 | -0.40    |
| 2014/7/19 | -0.42    |
| 2014/7/20 | -0.43    |
| 2014/7/21 | -0.44    |
| 2014/7/22 | -0.45    |
| 2014/7/23 | -0.46    |
| 2014/7/24 | -0.46    |
| 2014/7/25 | -0.45    |
| 2014/7/26 | -0.44    |
| 2014/7/27 | -0.42    |
| 2014/7/28 | -0.39    |
| 2014/7/29 | -0.35    |
| 2014/7/30 | -0.32    |
| 2014/7/31 | -0.29    |
| 2014/8/1  | -0.25    |
| 2014/8/2  | -0.21    |
| 2014/8/3  | -0.17    |
| 2014/8/4  | -0.13    |
| 2014/8/5  | -0.08    |
| 2014/8/6  | -0.05    |
| 2014/8/7  | -0.01    |
| 2014/8/8  | 0.03     |
| 2014/8/9  | 0.06     |
| 2014/8/10 | 0.09     |
| 2014/8/11 | 0.11     |
| 2014/8/12 | 0.13     |

|           |      |
|-----------|------|
| 2014/8/13 | 0.15 |
| 2014/8/14 | 0.16 |
| 2014/8/15 | 0.17 |
| 2014/8/16 | 0.17 |
| 2014/8/17 | 0.18 |
| 2014/8/18 | 0.18 |
| 2014/8/19 | 0.18 |
| 2014/8/20 | 0.18 |
| 2014/8/21 | 0.18 |
| 2014/8/22 | 0.18 |
| 2014/8/23 | 0.18 |
| 2014/8/24 | 0.18 |
| 2014/8/25 | 0.18 |
| 2014/8/26 | 0.18 |
| 2014/8/27 | 0.17 |
| 2014/8/28 | 0.17 |
| 2014/8/29 | 0.17 |
| 2014/8/30 | 0.17 |
| 2014/8/31 | 0.17 |
| 2014/9/1  | 0.17 |
| 2014/9/2  | 0.18 |
| 2014/9/3  | 0.18 |
| 2014/9/4  | 0.19 |
| 2014/9/5  | 0.20 |
| 2014/9/6  | 0.21 |
| 2014/9/7  | 0.22 |
| 2014/9/8  | 0.22 |
| 2014/9/9  | 0.23 |
| 2014/9/10 | 0.23 |
| 2014/9/11 | 0.23 |
| 2014/9/12 | 0.24 |
| 2014/9/13 | 0.24 |
| 2014/9/14 | 0.24 |
| 2014/9/15 | 0.24 |
| 2014/9/16 | 0.23 |
| 2014/9/17 | 0.23 |
| 2014/9/18 | 0.22 |
| 2014/9/19 | 0.21 |
| 2014/9/20 | 0.20 |
| 2014/9/21 | 0.19 |
| 2014/9/22 | 0.18 |
| 2014/9/23 | 0.17 |
| 2014/9/24 | 0.16 |
| 2014/9/25 | 0.16 |
| 2014/9/26 | 0.15 |
| 2014/9/27 | 0.15 |

|            |       |
|------------|-------|
| 2014/9/28  | 0.14  |
| 2014/9/29  | 0.13  |
| 2014/9/30  | 0.12  |
| 2014/10/1  | 0.11  |
| 2014/10/2  | 0.11  |
| 2014/10/3  | 0.10  |
| 2014/10/4  | 0.09  |
| 2014/10/5  | 0.08  |
| 2014/10/6  | 0.06  |
| 2014/10/7  | 0.05  |
| 2014/10/8  | 0.03  |
| 2014/10/9  | 0.02  |
| 2014/10/10 | 0.01  |
| 2014/10/11 | 0.01  |
| 2014/10/12 | 0.00  |
| 2014/10/13 | -0.01 |
| 2014/10/14 | -0.02 |
| 2014/10/15 | -0.03 |
| 2014/10/16 | -0.02 |
| 2014/10/17 | -0.02 |
| 2014/10/18 | -0.02 |
| 2014/10/19 | -0.01 |
| 2014/10/20 | -0.01 |
| 2014/10/21 | -0.01 |
| 2014/10/22 | -0.01 |
| 2014/10/23 | 0.00  |
| 2014/10/24 | 0.01  |
| 2014/10/25 | 0.00  |
| 2014/10/26 | 0.00  |
| 2014/10/27 | -0.01 |
| 2014/10/28 | -0.02 |
| 2014/10/29 | -0.04 |
| 2014/10/30 | -0.06 |
| 2014/10/31 | -0.08 |
| 2014/11/1  | -0.10 |
| 2014/11/2  | -0.12 |
| 2014/11/3  | -0.15 |
| 2014/11/4  | -0.17 |
| 2014/11/5  | -0.19 |
| 2014/11/6  | -0.22 |
| 2014/11/7  | -0.24 |
| 2014/11/8  | -0.26 |
| 2014/11/9  | -0.28 |
| 2014/11/10 | -0.29 |
| 2014/11/11 | -0.31 |
| 2014/11/12 | -0.32 |

|            |       |
|------------|-------|
| 2014/11/13 | -0.33 |
| 2014/11/14 | -0.34 |
| 2014/11/15 | -0.34 |
| 2014/11/16 | -0.35 |
| 2014/11/17 | -0.35 |
| 2014/11/18 | -0.34 |
| 2014/11/19 | -0.34 |
| 2014/11/20 | -0.33 |
| 2014/11/21 | -0.33 |
| 2014/11/22 | -0.32 |
| 2014/11/23 | -0.30 |
| 2014/11/24 | -0.29 |
| 2014/11/25 | -0.27 |
| 2014/11/26 | -0.26 |
| 2014/11/27 | -0.24 |
| 2014/11/28 | -0.22 |
| 2014/11/29 | -0.20 |
| 2014/11/30 | -0.18 |
| 2014/12/1  | -0.16 |
| 2014/12/2  | -0.14 |
| 2014/12/3  | -0.12 |
| 2014/12/4  | -0.10 |
| 2014/12/5  | -0.09 |
| 2014/12/6  | -0.07 |
| 2014/12/7  | -0.05 |
| 2014/12/8  | -0.04 |
| 2014/12/9  | -0.02 |
| 2014/12/10 | -0.01 |
| 2014/12/11 | 0.00  |
| 2014/12/12 | 0.01  |
| 2014/12/13 | 0.01  |
| 2014/12/14 | 0.02  |
| 2014/12/15 | 0.03  |
| 2014/12/16 | 0.03  |
| 2014/12/17 | 0.03  |
| 2014/12/18 | 0.04  |
| 2014/12/19 | 0.04  |
| 2014/12/20 | 0.04  |
| 2014/12/21 | 0.04  |
| 2014/12/22 | 0.05  |
| 2014/12/23 | 0.05  |
| 2014/12/24 | 0.05  |
| 2014/12/25 | 0.05  |
| 2014/12/26 | 0.06  |
| 2014/12/27 | 0.06  |
| 2014/12/28 | 0.06  |

|            |       |
|------------|-------|
| 2014/12/29 | 0.07  |
| 2014/12/30 | 0.07  |
| 2014/12/31 | 0.08  |
| 2015/1/1   | 0.08  |
| 2015/1/2   | 0.09  |
| 2015/1/3   | 0.09  |
| 2015/1/4   | 0.09  |
| 2015/1/5   | 0.09  |
| 2015/1/6   | 0.10  |
| 2015/1/7   | 0.10  |
| 2015/1/8   | 0.10  |
| 2015/1/9   | 0.10  |
| 2015/1/10  | 0.10  |
| 2015/1/11  | 0.10  |
| 2015/1/12  | 0.10  |
| 2015/1/13  | 0.10  |
| 2015/1/14  | 0.10  |
| 2015/1/15  | 0.09  |
| 2015/1/16  | 0.09  |
| 2015/1/17  | 0.09  |
| 2015/1/18  | 0.08  |
| 2015/1/19  | 0.08  |
| 2015/1/20  | 0.07  |
| 2015/1/21  | 0.06  |
| 2015/1/22  | 0.06  |
| 2015/1/23  | 0.06  |
| 2015/1/24  | 0.06  |
| 2015/1/25  | 0.05  |
| 2015/1/26  | 0.05  |
| 2015/1/27  | 0.05  |
| 2015/1/28  | 0.04  |
| 2015/1/29  | 0.03  |
| 2015/1/30  | 0.02  |
| 2015/1/31  | 0.01  |
| 2015/2/1   | 0.00  |
| 2015/2/2   | -0.01 |
| 2015/2/3   | -0.03 |
| 2015/2/4   | -0.04 |
| 2015/2/5   | -0.06 |
| 2015/2/6   | -0.07 |
| 2015/2/7   | -0.09 |
| 2015/2/8   | -0.11 |
| 2015/2/9   | -0.13 |
| 2015/2/10  | -0.15 |
| 2015/2/11  | -0.16 |
| 2015/2/12  | -0.18 |



|           |       |
|-----------|-------|
| 2015/2/13 | -0.20 |
| 2015/2/14 | -0.21 |
| 2015/2/15 | -0.22 |
| 2015/2/16 | -0.23 |
| 2015/2/17 | -0.23 |
| 2015/2/18 | -0.23 |
| 2015/2/19 | -0.24 |
| 2015/2/20 | -0.23 |
| 2015/2/21 | -0.23 |
| 2015/2/22 | -0.23 |
| 2015/2/23 | -0.23 |
| 2015/2/24 | -0.22 |
| 2015/2/25 | -0.22 |
| 2015/2/26 | -0.22 |
| 2015/2/27 | -0.21 |
| 2015/2/28 | -0.21 |
| 2015/3/1  | -0.21 |
| 2015/3/2  | -0.21 |
| 2015/3/3  | -0.20 |
| 2015/3/4  | -0.20 |
| 2015/3/5  | -0.20 |
| 2015/3/6  | -0.20 |
| 2015/3/7  | -0.20 |
| 2015/3/8  | -0.20 |
| 2015/3/9  | -0.21 |
| 2015/3/10 | -0.21 |
| 2015/3/11 | -0.22 |
| 2015/3/12 | -0.23 |
| 2015/3/13 | -0.24 |
| 2015/3/14 | -0.25 |
| 2015/3/15 | -0.26 |
| 2015/3/16 | -0.26 |
| 2015/3/17 | -0.27 |
| 2015/3/18 | -0.28 |
| 2015/3/19 | -0.29 |
| 2015/3/20 | -0.30 |
| 2015/3/21 | -0.31 |
| 2015/3/22 | -0.32 |
| 2015/3/23 | -0.32 |
| 2015/3/24 | -0.32 |
| 2015/3/25 | -0.32 |
| 2015/3/26 | -0.33 |
| 2015/3/27 | -0.33 |
| 2015/3/28 | -0.34 |
| 2015/3/29 | -0.34 |
| 2015/3/30 | -0.34 |

|           |       |
|-----------|-------|
| 2015/3/31 | -0.34 |
| 2015/4/1  | -0.34 |
| 2015/4/2  | -0.33 |
| 2015/4/3  | -0.32 |
| 2015/4/4  | -0.32 |
| 2015/4/5  | -0.32 |
| 2015/4/6  | -0.31 |
| 2015/4/7  | -0.30 |
| 2015/4/8  | -0.31 |
| 2015/4/9  | -0.31 |
| 2015/4/10 | -0.34 |
| 2015/4/11 | -0.36 |
| 2015/4/12 | -0.38 |
| 2015/4/13 | -0.40 |
| 2015/4/14 | -0.42 |
| 2015/4/15 | -0.44 |
| 2015/4/16 | -0.45 |
| 2015/4/17 | -0.47 |
| 2015/4/18 | -0.48 |
| 2015/4/19 | -0.48 |
| 2015/4/20 | -0.48 |
| 2015/4/21 | -0.49 |
| 2015/4/22 | -0.49 |
| 2015/4/23 | -0.48 |
| 2015/4/24 | -0.46 |
| 2015/4/25 | -0.45 |
| 2015/4/26 | -0.42 |
| 2015/4/27 | -0.40 |
| 2015/4/28 | -0.37 |
| 2015/4/29 | -0.34 |
| 2015/4/30 | -0.30 |
| 2015/5/1  | -0.28 |
| 2015/5/2  | -0.26 |
| 2015/5/3  | -0.24 |
| 2015/5/4  | -0.22 |
| 2015/5/5  | -0.20 |
| 2015/5/6  | -0.18 |
| 2015/5/7  | -0.17 |
| 2015/5/8  | -0.15 |
| 2015/5/9  | -0.14 |
| 2015/5/10 | -0.12 |
| 2015/5/11 | -0.11 |
| 2015/5/12 | -0.09 |
| 2015/5/13 | -0.07 |
| 2015/5/14 | -0.06 |
| 2015/5/15 | -0.05 |

|           |       |
|-----------|-------|
| 2015/5/16 | -0.04 |
| 2015/5/17 | -0.03 |
| 2015/5/18 | -0.02 |
| 2015/5/19 | -0.01 |
| 2015/5/20 | -0.01 |
| 2015/5/21 | 0.00  |
| 2015/5/22 | 0.00  |
| 2015/5/23 | 0.00  |
| 2015/5/24 | 0.01  |
| 2015/5/25 | 0.01  |
| 2015/5/26 | 0.01  |
| 2015/5/27 | 0.01  |
| 2015/5/28 | 0.02  |
| 2015/5/29 | 0.01  |
| 2015/5/30 | 0.01  |
| 2015/5/31 | 0.02  |
| 2015/6/1  | 0.01  |
| 2015/6/2  | 0.00  |
| 2015/6/3  | 0.00  |
| 2015/6/4  | 0.00  |
| 2015/6/5  | 0.00  |
| 2015/6/6  | 0.00  |
| 2015/6/7  | 0.00  |
| 2015/6/8  | 0.00  |
| 2015/6/9  | 0.00  |
| 2015/6/10 | -0.01 |
| 2015/6/11 | -0.01 |
| 2015/6/12 | 0.00  |
| 2015/6/13 | 0.01  |
| 2015/6/14 | 0.01  |
| 2015/6/15 | 0.01  |
| 2015/6/16 | 0.02  |
| 2015/6/17 | 0.02  |
| 2015/6/18 | 0.03  |
| 2015/6/19 | 0.04  |
| 2015/6/20 | 0.04  |
| 2015/6/21 | 0.05  |
| 2015/6/22 | 0.06  |
| 2015/6/23 | 0.07  |
| 2015/6/24 | 0.08  |
| 2015/6/25 | 0.09  |
| 2015/6/26 | 0.10  |
| 2015/6/27 | 0.11  |
| 2015/6/28 | 0.12  |
| 2015/6/29 | 0.13  |
| 2015/6/30 | 0.14  |

|           |      |
|-----------|------|
| 2015/7/1  | 0.14 |
| 2015/7/2  | 0.15 |
| 2015/7/3  | 0.16 |
| 2015/7/4  | 0.16 |
| 2015/7/5  | 0.17 |
| 2015/7/6  | 0.17 |
| 2015/7/7  | 0.17 |
| 2015/7/8  | 0.16 |
| 2015/7/9  | 0.16 |
| 2015/7/10 | 0.16 |
| 2015/7/11 | 0.15 |
| 2015/7/12 | 0.14 |
| 2015/7/13 | 0.13 |
| 2015/7/14 | 0.12 |
| 2015/7/15 | 0.11 |
| 2015/7/16 | 0.09 |
| 2015/7/17 | 0.08 |
| 2015/7/18 | 0.07 |
| 2015/7/19 | 0.06 |
| 2015/7/20 | 0.06 |
| 2015/7/21 | 0.05 |
| 2015/7/22 | 0.05 |
| 2015/7/23 | 0.05 |
| 2015/7/24 | 0.06 |
| 2015/7/25 | 0.06 |
| 2015/7/26 | 0.07 |
| 2015/7/27 | 0.07 |
| 2015/7/28 | 0.08 |
| 2015/7/29 | 0.09 |
| 2015/7/30 | 0.09 |
| 2015/7/31 | 0.10 |
| 2015/8/1  | 0.10 |
| 2015/8/2  | 0.11 |
| 2015/8/3  | 0.11 |
| 2015/8/4  | 0.12 |
| 2015/8/5  | 0.12 |
| 2015/8/6  | 0.12 |
| 2015/8/7  | 0.12 |
| 2015/8/8  | 0.13 |
| 2015/8/9  | 0.13 |
| 2015/8/10 | 0.13 |
| 2015/8/11 | 0.13 |
| 2015/8/12 | 0.13 |
| 2015/8/13 | 0.13 |
| 2015/8/14 | 0.13 |
| 2015/8/15 | 0.12 |

|           |      |
|-----------|------|
| 2015/8/16 | 0.12 |
| 2015/8/17 | 0.12 |
| 2015/8/18 | 0.13 |
| 2015/8/19 | 0.13 |
| 2015/8/20 | 0.13 |
| 2015/8/21 | 0.13 |
| 2015/8/22 | 0.13 |
| 2015/8/23 | 0.14 |
| 2015/8/24 | 0.15 |
| 2015/8/25 | 0.15 |
| 2015/8/26 | 0.16 |
| 2015/8/27 | 0.17 |
| 2015/8/28 | 0.19 |
| 2015/8/29 | 0.20 |
| 2015/8/30 | 0.21 |
| 2015/8/31 | 0.22 |
| 2015/9/1  | 0.23 |
| 2015/9/2  | 0.24 |
| 2015/9/3  | 0.25 |
| 2015/9/4  | 0.25 |
| 2015/9/5  | 0.26 |
| 2015/9/6  | 0.26 |
| 2015/9/7  | 0.27 |
| 2015/9/8  | 0.27 |
| 2015/9/9  | 0.28 |
| 2015/9/10 | 0.28 |
| 2015/9/11 | 0.28 |
| 2015/9/12 | 0.29 |
| 2015/9/13 | 0.29 |
| 2015/9/14 | 0.30 |
| 2015/9/15 | 0.30 |
| 2015/9/16 | 0.31 |
| 2015/9/17 | 0.31 |
| 2015/9/18 | 0.32 |
| 2015/9/19 | 0.33 |
| 2015/9/20 | 0.34 |
| 2015/9/21 | 0.35 |
| 2015/9/22 | 0.36 |
| 2015/9/23 | 0.37 |
| 2015/9/24 | 0.37 |
| 2015/9/25 | 0.38 |
| 2015/9/26 | 0.38 |
| 2015/9/27 | 0.38 |
| 2015/9/28 | 0.38 |
| 2015/9/29 | 0.37 |
| 2015/9/30 | 0.37 |

|            |      |
|------------|------|
| 2015/10/1  | 0.36 |
| 2015/10/2  | 0.35 |
| 2015/10/3  | 0.34 |
| 2015/10/4  | 0.33 |
| 2015/10/5  | 0.31 |
| 2015/10/6  | 0.30 |
| 2015/10/7  | 0.29 |
| 2015/10/8  | 0.29 |
| 2015/10/9  | 0.28 |
| 2015/10/10 | 0.27 |
| 2015/10/11 | 0.26 |
| 2015/10/12 | 0.25 |
| 2015/10/13 | 0.24 |
| 2015/10/14 | 0.24 |
| 2015/10/15 | 0.23 |
| 2015/10/16 | 0.23 |
| 2015/10/17 | 0.23 |
| 2015/10/18 | 0.23 |
| 2015/10/19 | 0.22 |
| 2015/10/20 | 0.22 |
| 2015/10/21 | 0.22 |
| 2015/10/22 | 0.22 |
| 2015/10/23 | 0.22 |
| 2015/10/24 | 0.22 |
| 2015/10/25 | 0.22 |
| 2015/10/26 | 0.22 |
| 2015/10/27 | 0.23 |
| 2015/10/28 | 0.24 |
| 2015/10/29 | 0.24 |
| 2015/10/30 | 0.25 |
| 2015/10/31 | 0.26 |
| 2015/11/1  | 0.26 |
| 2015/11/2  | 0.27 |
| 2015/11/3  | 0.28 |
| 2015/11/4  | 0.28 |
| 2015/11/5  | 0.29 |
| 2015/11/6  | 0.29 |
| 2015/11/7  | 0.29 |
| 2015/11/8  | 0.29 |
| 2015/11/9  | 0.29 |
| 2015/11/10 | 0.29 |
| 2015/11/11 | 0.29 |
| 2015/11/12 | 0.29 |
| 2015/11/13 | 0.30 |
| 2015/11/14 | 0.30 |
| 2015/11/15 | 0.31 |

|            |      |
|------------|------|
| 2015/11/16 | 0.31 |
| 2015/11/17 | 0.31 |
| 2015/11/18 | 0.32 |
| 2015/11/19 | 0.32 |
| 2015/11/20 | 0.33 |
| 2015/11/21 | 0.33 |
| 2015/11/22 | 0.34 |
| 2015/11/23 | 0.34 |
| 2015/11/24 | 0.35 |
| 2015/11/25 | 0.36 |
| 2015/11/26 | 0.36 |
| 2015/11/27 | 0.37 |
| 2015/11/28 | 0.37 |
| 2015/11/29 | 0.38 |
| 2015/11/30 | 0.38 |
| 2015/12/1  | 0.39 |
| 2015/12/2  | 0.39 |
| 2015/12/3  | 0.39 |
| 2015/12/4  | 0.39 |
| 2015/12/5  | 0.39 |
| 2015/12/6  | 0.39 |
| 2015/12/7  | 0.39 |
| 2015/12/8  | 0.40 |
| 2015/12/9  | 0.40 |
| 2015/12/10 | 0.40 |
| 2015/12/11 | 0.40 |
| 2015/12/12 | 0.40 |
| 2015/12/13 | 0.40 |
| 2015/12/14 | 0.40 |
| 2015/12/15 | 0.40 |
| 2015/12/16 | 0.40 |
| 2015/12/17 | 0.40 |
| 2015/12/18 | 0.40 |
| 2015/12/19 | 0.40 |
| 2015/12/20 | 0.40 |
| 2015/12/21 | 0.39 |
| 2015/12/22 | 0.38 |
| 2015/12/23 | 0.37 |
| 2015/12/24 | 0.36 |
| 2015/12/25 | 0.35 |
| 2015/12/26 | 0.33 |
| 2015/12/27 | 0.31 |
| 2015/12/28 | 0.29 |
| 2015/12/29 | 0.27 |
| 2015/12/30 | 0.25 |
| 2015/12/31 | 0.23 |

|           |       |
|-----------|-------|
| 2016/1/1  | 0.22  |
| 2016/1/2  | 0.20  |
| 2016/1/3  | 0.18  |
| 2016/1/4  | 0.17  |
| 2016/1/5  | 0.17  |
| 2016/1/6  | 0.16  |
| 2016/1/7  | 0.15  |
| 2016/1/8  | 0.15  |
| 2016/1/9  | 0.15  |
| 2016/1/10 | 0.15  |
| 2016/1/11 | 0.15  |
| 2016/1/12 | 0.16  |
| 2016/1/13 | 0.17  |
| 2016/1/14 | 0.16  |
| 2016/1/15 | 0.16  |
| 2016/1/16 | 0.16  |
| 2016/1/17 | 0.16  |
| 2016/1/18 | 0.15  |
| 2016/1/19 | 0.15  |
| 2016/1/20 | 0.14  |
| 2016/1/21 | 0.13  |
| 2016/1/22 | 0.11  |
| 2016/1/23 | 0.09  |
| 2016/1/24 | 0.08  |
| 2016/1/25 | 0.06  |
| 2016/1/26 | 0.04  |
| 2016/1/27 | 0.02  |
| 2016/1/28 | 0.00  |
| 2016/1/29 | -0.01 |
| 2016/1/30 | -0.03 |
| 2016/1/31 | -0.04 |
| 2016/2/1  | -0.06 |
| 2016/2/2  | -0.07 |
| 2016/2/3  | -0.07 |
| 2016/2/4  | -0.07 |
| 2016/2/5  | -0.07 |
| 2016/2/6  | -0.08 |
| 2016/2/7  | -0.08 |
| 2016/2/8  | -0.08 |
| 2016/2/9  | -0.09 |
| 2016/2/10 | -0.09 |
| 2016/2/11 | -0.09 |
| 2016/2/12 | -0.08 |
| 2016/2/13 | -0.09 |
| 2016/2/14 | -0.09 |
| 2016/2/15 | -0.09 |



|           |       |
|-----------|-------|
| 2016/2/16 | -0.09 |
| 2016/2/17 | -0.10 |
| 2016/2/18 | -0.10 |
| 2016/2/19 | -0.11 |
| 2016/2/20 | -0.11 |
| 2016/2/21 | -0.11 |
| 2016/2/22 | -0.11 |
| 2016/2/23 | -0.11 |
| 2016/2/24 | -0.11 |
| 2016/2/25 | -0.11 |
| 2016/2/26 | -0.10 |
| 2016/2/27 | -0.10 |
| 2016/2/28 | -0.09 |
| 2016/2/29 | -0.07 |
| 2016/3/1  | -0.06 |
| 2016/3/2  | -0.04 |
| 2016/3/3  | -0.01 |
| 2016/3/4  | 0.00  |
| 2016/3/5  | 0.02  |
| 2016/3/6  | 0.04  |
| 2016/3/7  | 0.06  |
| 2016/3/8  | 0.08  |
| 2016/3/9  | 0.10  |
| 2016/3/10 | 0.12  |
| 2016/3/11 | 0.14  |
| 2016/3/12 | 0.15  |
| 2016/3/13 | 0.17  |
| 2016/3/14 | 0.18  |
| 2016/3/15 | 0.19  |
| 2016/3/16 | 0.20  |
| 2016/3/17 | 0.21  |
| 2016/3/18 | 0.21  |
| 2016/3/19 | 0.21  |
| 2016/3/20 | 0.22  |
| 2016/3/21 | 0.22  |
| 2016/3/22 | 0.22  |
| 2016/3/23 | 0.22  |
| 2016/3/24 | 0.22  |
| 2016/3/25 | 0.22  |
| 2016/3/26 | 0.22  |
| 2016/3/27 | 0.22  |
| 2016/3/28 | 0.22  |
| 2016/3/29 | 0.22  |
| 2016/3/30 | 0.23  |
| 2016/3/31 | 0.23  |
| 2016/4/1  | 0.23  |

|           |      |
|-----------|------|
| 2016/4/2  | 0.23 |
| 2016/4/3  | 0.24 |
| 2016/4/4  | 0.24 |
| 2016/4/5  | 0.25 |
| 2016/4/6  | 0.25 |
| 2016/4/7  | 0.25 |
| 2016/4/8  | 0.26 |
| 2016/4/9  | 0.26 |
| 2016/4/10 | 0.27 |
| 2016/4/11 | 0.27 |
| 2016/4/12 | 0.27 |
| 2016/4/13 | 0.27 |
| 2016/4/14 | 0.27 |
| 2016/4/15 | 0.27 |
| 2016/4/16 | 0.26 |
| 2016/4/17 | 0.26 |
| 2016/4/18 | 0.25 |
| 2016/4/19 | 0.25 |
| 2016/4/20 | 0.24 |
| 2016/4/21 | 0.23 |
| 2016/4/22 | 0.22 |
| 2016/4/23 | 0.21 |
| 2016/4/24 | 0.20 |
| 2016/4/25 | 0.19 |
| 2016/4/26 | 0.17 |
| 2016/4/27 | 0.16 |
| 2016/4/28 | 0.15 |
| 2016/4/29 | 0.14 |
| 2016/4/30 | 0.13 |
| 2016/5/1  | 0.12 |
| 2016/5/2  | 0.11 |
| 2016/5/3  | 0.11 |
| 2016/5/4  | 0.10 |
| 2016/5/5  | 0.09 |
| 2016/5/6  | 0.09 |
| 2016/5/7  | 0.08 |
| 2016/5/8  | 0.08 |
| 2016/5/9  | 0.08 |
| 2016/5/10 | 0.08 |
| 2016/5/11 | 0.09 |
| 2016/5/12 | 0.09 |
| 2016/5/13 | 0.08 |
| 2016/5/14 | 0.08 |
| 2016/5/15 | 0.08 |
| 2016/5/16 | 0.07 |
| 2016/5/17 | 0.07 |

|           |      |
|-----------|------|
| 2016/5/18 | 0.07 |
| 2016/5/19 | 0.07 |
| 2016/5/20 | 0.07 |
| 2016/5/21 | 0.08 |
| 2016/5/22 | 0.08 |
| 2016/5/23 | 0.09 |
| 2016/5/24 | 0.09 |
| 2016/5/25 | 0.10 |
| 2016/5/26 | 0.11 |
| 2016/5/27 | 0.11 |
| 2016/5/28 | 0.12 |
| 2016/5/29 | 0.13 |
| 2016/5/30 | 0.14 |
| 2016/5/31 | 0.15 |
| 2016/6/1  | 0.16 |
| 2016/6/2  | 0.17 |
| 2016/6/3  | 0.18 |
| 2016/6/4  | 0.19 |
| 2016/6/5  | 0.19 |
| 2016/6/6  | 0.20 |
| 2016/6/7  | 0.21 |
| 2016/6/8  | 0.22 |
| 2016/6/9  | 0.22 |
| 2016/6/10 | 0.23 |
| 2016/6/11 | 0.24 |
| 2016/6/12 | 0.24 |
| 2016/6/13 | 0.24 |
| 2016/6/14 | 0.24 |
| 2016/6/15 | 0.25 |
| 2016/6/16 | 0.25 |
| 2016/6/17 | 0.25 |
| 2016/6/18 | 0.26 |
| 2016/6/19 | 0.26 |
| 2016/6/20 | 0.26 |
| 2016/6/21 | 0.26 |
| 2016/6/22 | 0.26 |
| 2016/6/23 | 0.26 |
| 2016/6/24 | 0.26 |
| 2016/6/25 | 0.26 |
| 2016/6/26 | 0.26 |
| 2016/6/27 | 0.26 |
| 2016/6/28 | 0.26 |
| 2016/6/29 | 0.26 |
| 2016/6/30 | 0.26 |
| 2016/7/1  | 0.26 |
| 2016/7/2  | 0.25 |

|           |      |
|-----------|------|
| 2016/7/3  | 0.25 |
| 2016/7/4  | 0.25 |
| 2016/7/5  | 0.25 |
| 2016/7/6  | 0.24 |
| 2016/7/7  | 0.24 |
| 2016/7/8  | 0.23 |
| 2016/7/9  | 0.23 |
| 2016/7/10 | 0.22 |
| 2016/7/11 | 0.22 |
| 2016/7/12 | 0.21 |
| 2016/7/13 | 0.20 |
| 2016/7/14 | 0.19 |
| 2016/7/15 | 0.18 |
| 2016/7/16 | 0.17 |
| 2016/7/17 | 0.16 |
| 2016/7/18 | 0.15 |
| 2016/7/19 | 0.15 |
| 2016/7/20 | 0.14 |
| 2016/7/21 | 0.14 |
| 2016/7/22 | 0.14 |
| 2016/7/23 | 0.14 |
| 2016/7/24 | 0.14 |
| 2016/7/25 | 0.15 |
| 2016/7/26 | 0.15 |
| 2016/7/27 | 0.15 |
| 2016/7/28 | 0.15 |
| 2016/7/29 | 0.15 |
| 2016/7/30 | 0.15 |
| 2016/7/31 | 0.15 |
| 2016/8/1  | 0.16 |
| 2016/8/2  | 0.15 |
| 2016/8/3  | 0.15 |
| 2016/8/4  | 0.15 |
| 2016/8/5  | 0.14 |
| 2016/8/6  | 0.13 |
| 2016/8/7  | 0.13 |
| 2016/8/8  | 0.12 |
| 2016/8/9  | 0.12 |
| 2016/8/10 | 0.12 |
| 2016/8/11 | 0.12 |
| 2016/8/12 | 0.12 |
| 2016/8/13 | 0.12 |
| 2016/8/14 | 0.12 |
| 2016/8/15 | 0.12 |
| 2016/8/16 | 0.12 |
| 2016/8/17 | 0.12 |

|           |       |
|-----------|-------|
| 2016/8/18 | 0.12  |
| 2016/8/19 | 0.12  |
| 2016/8/20 | 0.12  |
| 2016/8/21 | 0.12  |
| 2016/8/22 | 0.11  |
| 2016/8/23 | 0.11  |
| 2016/8/24 | 0.11  |
| 2016/8/25 | 0.10  |
| 2016/8/26 | 0.10  |
| 2016/8/27 | 0.10  |
| 2016/8/28 | 0.09  |
| 2016/8/29 | 0.09  |
| 2016/8/30 | 0.09  |
| 2016/8/31 | 0.09  |
| 2016/9/1  | 0.09  |
| 2016/9/2  | 0.10  |
| 2016/9/3  | 0.10  |
| 2016/9/4  | 0.10  |
| 2016/9/5  | 0.11  |
| 2016/9/6  | 0.12  |
| 2016/9/7  | 0.13  |
| 2016/9/8  | 0.14  |
| 2016/9/9  | 0.16  |
| 2016/9/10 | 0.18  |
| 2016/9/11 | 0.19  |
| 2016/9/12 | 0.20  |
| 2016/9/13 | 0.22  |
| 2016/9/14 | 0.23  |
| 2016/9/15 | 0.24  |
| 2016/9/16 | 0.24  |
| 2016/9/17 | 0.24  |
| 2016/9/18 | 0.24  |
| 2016/9/19 | 0.25  |
| 2016/9/20 | 0.24  |
| 2016/9/21 | 0.24  |
| 2016/9/22 | 0.23  |
| 2016/9/23 | 0.21  |
| 2016/9/24 | 0.20  |
| 2016/9/25 | 0.18  |
| 2016/9/26 | 0.16  |
| 2016/9/27 | 0.14  |
| 2016/9/28 | 0.10  |
| 2016/9/29 | 0.07  |
| 2016/9/30 | 0.04  |
| 2016/10/1 | 0.01  |
| 2016/10/2 | -0.02 |

---

Table S6. Primary productivity calculated from satellite data acquired from MODIS Aqua and the Vertically Generalized Production Model

| Date      | Surface chlorophyll- <i>a</i><br>(mg m <sup>-3</sup> ) | SST<br>(°C) | Photosynthetically<br>active radiation<br>(Einstein m <sup>-2</sup> day <sup>-1</sup> ) | Depth of<br>euphotic zone<br>(m) | Daylength<br>(h) | Primary<br>productivity<br>(mg-C m <sup>-2</sup> day <sup>-1</sup> ) |
|-----------|--------------------------------------------------------|-------------|-----------------------------------------------------------------------------------------|----------------------------------|------------------|----------------------------------------------------------------------|
| 2014/7/4  |                                                        | 22.9665     | 31.3088                                                                                 |                                  | 14.0290          |                                                                      |
| 2014/7/12 | 0.1092                                                 | 23.9982     | 49.7863                                                                                 | 82.7509                          | 13.9398          | 447                                                                  |
| 2014/7/20 | 0.1095                                                 | 25.6277     | 47.2261                                                                                 | 85.6996                          | 13.8140          | 411                                                                  |
| 2014/7/28 | 0.0900                                                 | 26.6654     | 57.1218                                                                                 | 99.4364                          | 13.6542          | 362                                                                  |
| 2014/8/5  | 0.0666                                                 | 27.7590     | 53.7774                                                                                 | 106.7248                         | 13.4669          | 256                                                                  |
| 2014/8/13 | 0.0637                                                 | 28.0648     | 51.2213                                                                                 | 118.5069                         | 13.2546          | 258                                                                  |
| 2014/8/21 | 0.0561                                                 | 28.8647     | 47.0369                                                                                 | 117.4228                         | 13.0246          | 201                                                                  |
| 2014/8/29 | 0.0644                                                 | 28.0016     | 48.9501                                                                                 | 115.5686                         | 12.7787          | 246                                                                  |
| 2014/9/6  | 0.0725                                                 | 26.6466     | 33.9011                                                                                 | 109.2414                         | 12.5226          | 281                                                                  |
| 2014/9/14 | 0.1035                                                 | 25.5145     | 31.0310                                                                                 | 84.1284                          | 12.2579          | 327                                                                  |
| 2014/9/22 | 0.0840                                                 | 24.7126     | 35.3057                                                                                 | 102.0506                         | 11.9897          | 338                                                                  |
| 2014/9/30 | 0.1264                                                 | 24.6112     | 32.3690                                                                                 | 87.6992                          | 11.7192          | 426                                                                  |
| 2014/10/8 | 0.1336                                                 | 24.3917     | 29.9988                                                                                 | 82.1391                          | 11.4513          | 415                                                                  |
| 2014/10/1 | 0.1213                                                 | 23.7114     | 31.0925                                                                                 | 80.2169                          | 11.1876          | 375                                                                  |
| 2014/10/2 | 0.1199                                                 | 23.5579     | 28.8488                                                                                 | 89.7095                          | 10.9338          | 405                                                                  |
| 2014/11/1 | 0.1289                                                 | 22.9729     | 16.5409                                                                                 | 81.6067                          | 10.6929          | 365                                                                  |
| 2014/11/9 | 0.1297                                                 | 22.8248     | 23.2388                                                                                 | 88.4779                          | 10.4719          | 417                                                                  |
| 2014/11/1 | 0.1458                                                 | 22.0084     | 21.0901                                                                                 | 73.3908                          | 10.2751          | 388                                                                  |
| 2014/11/2 | 0.1282                                                 | 21.6710     | 18.0352                                                                                 | 76.6002                          | 10.1101          | 345                                                                  |
| 2014/12/3 | 0.1487                                                 | 20.9984     | 15.9741                                                                                 | 66.0245                          | 9.9822           | 338                                                                  |
| 2014/12/1 | 0.1516                                                 | 20.3309     | 16.8632                                                                                 | 55.6634                          | 9.8974           | 294                                                                  |
| 2014/12/1 | 0.1346                                                 | 19.2302     | 11.9906                                                                                 | 58.3901                          | 9.8592           | 253                                                                  |
| 2014/12/2 | 0.1779                                                 | 18.9862     | 16.1203                                                                                 | 60.6805                          | 9.8699           | 371                                                                  |
| 2015/1/1  | 0.1135                                                 | 18.6117     | 15.1693                                                                                 | 78.3164                          | 9.9011           | 301                                                                  |
| 2015/1/9  | 0.1414                                                 | 18.4067     | 17.6327                                                                                 | 63.5687                          | 9.9889           | 315                                                                  |
| 2015/1/17 | 0.1358                                                 | 18.0230     | 16.5358                                                                                 | 63.0250                          | 10.1199          | 298                                                                  |
| 2015/1/25 | 0.1557                                                 | 17.3831     | 18.4982                                                                                 | 73.8857                          | 10.2885          | 408                                                                  |
| 2015/2/2  | 0.1493                                                 | 17.2870     | 22.1911                                                                                 | 68.2302                          | 10.4888          | 379                                                                  |
| 2015/2/10 | 0.1468                                                 | 17.0317     | 24.3422                                                                                 | 72.6979                          | 10.7140          | 407                                                                  |
| 2015/2/18 | 0.1648                                                 | 16.4342     | 28.5795                                                                                 | 65.9703                          | 10.9589          | 423                                                                  |
| 2015/2/26 | 0.2205                                                 | 16.7536     | 31.9528                                                                                 | 62.6337                          | 11.2170          | 565                                                                  |
| 2015/3/6  |                                                        | 16.3687     | 27.9827                                                                                 |                                  | 11.4847          |                                                                      |
| 2015/3/14 | 0.2360                                                 | 16.8531     | 24.4482                                                                                 | 56.0979                          | 11.7570          | 551                                                                  |
| 2015/3/22 | 0.3377                                                 | 16.6460     | 39.2209                                                                                 | 45.2988                          | 12.0311          | 683                                                                  |
| 2015/3/30 | 0.4984                                                 | 16.7658     | 45.5848                                                                                 | 39.9979                          | 12.3029          | 926                                                                  |
| 2015/4/7  |                                                        | 16.3847     | 28.9062                                                                                 |                                  | 12.5701          |                                                                      |
| 2015/4/15 |                                                        | 18.8669     | 46.9835                                                                                 |                                  | 12.8281          |                                                                      |
| 2015/4/23 | 0.1912                                                 | 19.9619     | 42.4806                                                                                 | 59.9733                          | 13.0751          | 599                                                                  |
| 2015/5/1  | 0.1586                                                 | 20.4948     | 39.2411                                                                                 | 64.4270                          | 13.3040          | 537                                                                  |
| 2015/5/9  | 0.1365                                                 | 20.5813     | 54.9118                                                                                 | 78.1519                          | 13.5136          | 584                                                                  |

|           |        |         |         |          |         |     |
|-----------|--------|---------|---------|----------|---------|-----|
| 2015/5/17 |        | 19.9441 | 31.3495 |          | 13.6962 |     |
| 2015/5/25 | 0.1405 | 21.4349 | 42.6082 | 88.5961  | 13.8495 | 674 |
| 2015/6/2  |        | 21.4110 | 35.9370 |          | 13.9668 |     |
| 2015/6/10 |        | 22.5165 | 34.5681 |          | 14.0458 |     |
| 2015/6/18 | 0.0881 | 22.9435 | 28.5603 | 90.9406  | 14.0828 | 400 |
| 2015/6/26 | 0.0870 | 23.4467 | 41.8269 | 87.9447  | 14.0771 | 388 |
| 2015/7/4  | 0.0828 | 25.3063 | 58.7085 | 91.5979  | 14.0291 | 351 |
| 2015/7/12 | 0.0820 | 25.9442 | 59.3919 | 97.5112  | 13.9400 | 351 |
| 2015/7/20 | 0.0661 | 27.5834 | 57.0432 | 109.1374 | 13.8143 | 272 |
| 2015/7/28 | 0.0583 | 28.2140 | 56.1047 | 128.8124 | 13.6545 | 262 |
| 2015/8/5  | 0.0559 | 28.9651 | 45.8391 | 119.3129 | 13.4673 | 207 |
| 2015/8/13 | 0.0583 | 27.4468 | 55.4253 | 126.7583 | 13.2550 | 270 |
| 2015/8/21 | 0.0561 | 27.2449 | 39.8782 | 179.7504 | 13.0252 | 359 |
| 2015/8/29 | 0.0713 | 26.6831 | 51.3688 | 106.6493 | 12.7788 | 285 |
| 2015/9/6  | 0.0591 | 27.0873 | 50.0467 | 129.9128 | 12.5231 | 272 |
| 2015/9/14 | 0.0608 | 27.2092 | 38.7963 | 110.3864 | 12.2587 | 225 |
| 2015/9/22 | 0.0695 | 27.1005 | 29.8253 | 118.7458 | 11.9903 | 266 |
| 2015/9/30 | 0.0846 | 26.2592 | 36.7609 | 103.9527 | 11.7200 | 304 |
| 2015/10/8 | 0.1057 | 24.4616 | 33.5619 | 100.5500 | 11.4518 | 405 |
| 2015/10/1 | 0.1126 | 23.8219 | 19.8895 | 94.0940  | 11.1883 | 381 |
| 2015/10/2 | 0.1147 | 23.9537 | 28.7194 | 87.0824  | 10.9344 | 368 |
| 2015/11/1 | 0.1334 | 23.4004 | 22.6584 | 79.9305  | 10.6936 | 383 |
| 2015/11/9 | 0.1617 | 23.0777 | 20.3892 | 70.0889  | 10.4723 | 398 |
| 2015/11/1 | 0.1447 | 22.7867 | 16.4017 | 76.0288  | 10.2756 | 370 |
| 2015/11/2 | 0.1841 | 21.8699 | 20.9131 | 59.5737  | 10.1105 | 392 |
| 2015/12/3 | 0.1825 | 21.6755 | 16.7390 | 58.0563  | 9.9825  | 362 |
| 2015/12/1 | 0.2088 | 21.3085 | 12.6437 | 55.1558  | 9.8975  | 370 |
| 2015/12/1 | 0.1817 | 20.8394 | 19.4156 | 56.7971  | 9.8593  | 365 |
| 2015/12/2 | 0.1986 | 20.2737 | 18.3470 | 62.6322  | 9.8698  | 439 |
| 2016/1/1  | 0.1719 | 19.6349 | 13.6239 | 65.0149  | 9.9011  | 373 |
| 2016/1/9  | 0.1471 | 19.6489 | 15.5225 | 68.3365  | 9.9892  | 348 |
| 2016/1/17 | 0.1471 | 18.9162 | 13.9115 | 65.1828  | 10.1200 | 327 |
| 2016/1/25 | 0.1537 | 18.6625 | 20.2061 | 62.4747  | 10.2889 | 357 |
| 2016/2/2  | 0.1880 | 18.7361 | 19.5922 | 55.1145  | 10.4889 | 391 |
| 2016/2/10 | 0.2432 | 18.4231 | 21.7101 | 53.9221  | 10.7147 | 512 |
| 2016/2/18 | 0.3670 | 17.6239 | 20.0653 | 48.4852  | 10.9590 | 687 |
| 2016/2/26 | 0.1918 | 18.1184 | 27.8325 | 59.8080  | 11.2177 | 482 |
| 2016/3/5  | 0.2064 | 18.2141 | 30.4664 | 59.6894  | 11.4849 | 538 |
| 2016/3/13 | 0.1847 | 18.6164 | 35.6825 | 60.1872  | 11.7577 | 509 |
| 2016/3/21 | 0.2515 | 18.7146 | 32.3236 | 54.9371  | 12.0312 | 642 |
| 2016/3/29 | 0.2518 | 18.3794 | 41.7777 | 57.5544  | 12.3036 | 702 |
| 2016/4/6  |        | 18.3486 | 32.1435 |          | 12.5701 |     |
| 2016/4/14 | 0.2584 | 18.8814 | 37.8122 | 52.6019  | 12.8293 | 686 |
| 2016/4/22 |        | 19.1281 | 28.3299 |          | 13.0746 |     |
| 2016/4/30 | 0.1557 | 19.3125 | 47.8662 | 77.4861  | 13.3051 | 647 |
| 2016/5/8  | 0.1000 | 19.2212 | 43.4228 | 71.1292  | 13.5132 | 384 |

|           |        |         |         |          |         |     |
|-----------|--------|---------|---------|----------|---------|-----|
| 2016/5/16 | 0.0927 | 20.6586 | 48.6331 | 76.4482  | 13.6970 | 390 |
| 2016/5/24 | 0.1123 | 20.4906 | 45.8259 | 94.7112  | 13.8492 | 590 |
| 2016/6/1  | 0.1113 | 22.1173 | 35.7396 | 88.7401  | 13.9672 | 519 |
| 2016/6/9  | 0.0813 | 18.8917 | 45.6618 | 85.6187  | 14.0457 | 391 |
| 2016/6/17 | 0.0969 | 22.6028 | 49.6736 | 90.8369  | 14.0829 | 472 |
| 2016/6/25 | 0.0918 | 23.8921 | 56.6444 | 89.9327  | 14.0772 | 419 |
| 2016/7/3  | 0.0808 | 25.1487 | 49.8230 | 104.6276 | 14.0288 | 391 |
| 2016/7/11 | 0.0669 | 25.2946 | 50.3034 | 102.2830 | 13.9403 | 311 |
| 2016/7/19 | 0.0595 | 25.7475 | 52.8249 | 120.8177 | 13.8137 | 315 |
| 2016/7/27 | 0.0687 | 26.6472 | 51.7082 | 104.7827 | 13.6548 | 289 |
| 2016/8/4  | 0.0671 | 26.5795 | 47.4864 | 113.7825 | 13.4663 | 302 |
| 2016/8/12 | 0.0712 | 26.0024 | 39.0748 | 106.8711 | 13.2555 | 305 |
| 2016/8/20 | 0.0662 | 26.4999 | 48.4140 | 121.1632 | 13.0240 | 310 |
| 2016/8/28 | 0.1159 | 27.0130 | 48.7043 | 82.6516  | 12.7793 | 348 |
| 2016/9/5  | 0.0860 | 27.6137 | 47.8575 | 92.6599  | 12.5225 | 268 |
| 2016/9/13 | 0.0889 | 27.9903 | 43.9599 | 93.4037  | 12.2586 | 262 |
| 2016/9/21 | 0.0850 | 27.7764 | 40.1395 | 100.1941 | 11.9896 | 266 |
| 2016/9/29 | 0.0877 | 27.3481 | 36.4608 | 90.7321  | 11.7199 | 250 |

---



Table S7. Fluxes of sinking particles and microplastics (MPs) at Stns. KEO and Kiel 276

|                                                                               | Stn. KEO                                      | Stn. Kiel 276                              |
|-------------------------------------------------------------------------------|-----------------------------------------------|--------------------------------------------|
| Latitude, longitude                                                           | 32°22'N, 144°25'E                             | 33°N, 22°W                                 |
| Water depth (m)<br>(Mooring depth)                                            | 5900<br>(4900)                                | 5300<br>(2000)                             |
| Sampling interval                                                             | 1 July 2014<br>-2 October 2016                | 20 April 2003<br>-1 July 2015              |
| Total mass flux (mg m <sup>-2</sup> day <sup>-1</sup> )<br>(Mean ± S.D.)      | 11.5–144.8<br>(52.0 ± 26.8)                   | 0.2–246.9<br>(50.4 ± 50.3)                 |
| Organic carbon flux (mg m <sup>-2</sup> day <sup>-1</sup> )<br>(Mean ± S.D.)  | 0.51–6.7<br>(2.3 ± 1.2)                       | -                                          |
| MP particle size (µm)<br>(Mean ± S.D.)                                        | 20–480<br>(66 ± 53)                           | (88 ± 113)                                 |
| MP aspect ratio<br>Mean ± S.D.                                                | 0.75 ± 0.20                                   | -                                          |
| MP Shannon diversity (H')                                                     | 3.0                                           | -                                          |
| MP abundance flux (pieces m <sup>-2</sup> day <sup>-1</sup> )<br>(Mean ± S.D) | 111–889<br>(352 ± 194)                        | 1–3147<br>(421 ± 715)                      |
| MP mass flux (mg m <sup>-2</sup> day <sup>-1</sup> )<br>(Mean ± S.D)          | 4.5×10 <sup>-3</sup> –0.38<br>(0.054 ± 0.075) | 9.6×10 <sup>-5</sup> –4.8<br>(0.18 ± 0.55) |
| MP carbon flux (mg m <sup>-2</sup> day <sup>-1</sup> )<br>(Mean ± S.D)        | 3.2×10 <sup>-3</sup> –0.24<br>(0.035 ± 0.048) | 8.8×10 <sup>-5</sup> –4.1<br>(0.14 ± 0.46) |
| Reference                                                                     | This study                                    | Reineccius and Waniek <sup>6</sup>         |

Table S8. Summary of individual microplastic particles observed in sediment trap samples at Stn. KEO. Polymer-type abbreviations are as shown in Table S1

| Sample number     | Microplastic serial number | Major axis (µm) | Minor axis (µm) | Polymer type | Shape type | Aspect ratio | Volume (cm <sup>3</sup> ) | Mass (g) |
|-------------------|----------------------------|-----------------|-----------------|--------------|------------|--------------|---------------------------|----------|
| KEOST2014-2015 #1 | 1                          | 30              | 30              | ABS          | fragment   | 1.00         | 1.1E-08                   | 1.2E-08  |
| KEOST2014-2015 #1 | 2                          | 40              | 30              | PA           | fragment   | 0.75         | 1.4E-08                   | 1.6E-08  |
| KEOST2014-2015 #1 | 3                          | 40              | 30              | PA           | fragment   | 0.75         | 1.4E-08                   | 1.6E-08  |
| KEOST2014-2015 #1 | 4                          | 70              | 50              | PBT          | fragment   | 0.71         | 6.9E-08                   | 9.3E-08  |
| KEOST2014-2015 #1 | 5                          | 100             | 90              | PE           | fragment   | 0.90         | 3.2E-07                   | 3.0E-07  |
| KEOST2014-2015 #1 | 6                          | 60              | 40              | PE           | fragment   | 0.67         | 3.8E-08                   | 3.6E-08  |
| KEOST2014-2015 #1 | 7                          | 30              | 20              | PE           | fragment   | 0.67         | 4.7E-09                   | 4.4E-09  |
| KEOST2014-2015 #1 | 8                          | 70              | 30              | PE           | fragment   | 0.43         | 2.5E-08                   | 2.3E-08  |
| KEOST2014-2015 #1 | 9                          | 40              | 30              | PE           | fragment   | 0.75         | 1.4E-08                   | 1.3E-08  |
| KEOST2014-2015 #1 | 10                         | 90              | 50              | PET          | fragment   | 0.56         | 8.8E-08                   | 1.2E-07  |
| KEOST2014-2015 #1 | 11                         | 120             | 30              | PET          | fiber      | -            | 3.4E-08                   | 4.6E-08  |
| KEOST2014-2015 #1 | 12                         | 150             | 30              | PET          | fragment   | 0.20         | 5.3E-08                   | 7.2E-08  |
| KEOST2014-2015 #1 | 13                         | 80              | 30              | PET          | fiber      | -            | 2.3E-08                   | 3.1E-08  |
| KEOST2014-2015 #1 | 14                         | 870             | 50              | PET          | fiber      | -            | 6.8E-07                   | 9.2E-07  |
| KEOST2014-2015 #1 | 15                         | 320             | 40              | PET          | fiber      | -            | 1.6E-07                   | 2.2E-07  |
| KEOST2014-2015 #1 | 16                         | 100             | 60              | PET          | fragment   | 0.60         | 1.4E-07                   | 1.9E-07  |
| KEOST2014-2015 #1 | 17                         | 30              | 30              | PP           | fragment   | 1.00         | 1.1E-08                   | 9.6E-09  |
| KEOST2014-2015 #1 | 18                         | 50              | 30              | PP           | fragment   | 0.60         | 1.8E-08                   | 1.6E-08  |
| KEOST2014-2015 #1 | 19                         | 400             | 60              | PU           | fiber      | -            | 4.5E-07                   | 5.3E-07  |
| KEOST2014-2015 #2 | 20                         | 80              | 50              | EP           | fragment   | 0.63         | 7.9E-08                   | 1.0E-07  |
| KEOST2014-2015 #2 | 21                         | 190             | 130             | EVA          | fragment   | 0.68         | 1.3E-06                   | 1.2E-06  |
| KEOST2014-2015 #2 | 22                         | 80              | 50              | EVA          | fragment   | 0.63         | 7.9E-08                   | 7.3E-08  |
| KEOST2014-2015 #2 | 23                         | 70              | 60              | EVOH         | fragment   | 0.86         | 9.9E-08                   | 1.1E-07  |
| KEOST2014-2015 #2 | 24                         | 60              | 50              | EVOH         | fragment   | 0.83         | 5.9E-08                   | 6.8E-08  |
| KEOST2014-2015 #2 | 25                         | 30              | 30              | PA           | fragment   | 1.00         | 1.1E-08                   | 1.2E-08  |
| KEOST2014-2015 #2 | 26                         | 70              | 50              | PE           | fragment   | 0.71         | 6.9E-08                   | 6.5E-08  |
| KEOST2014-2015 #2 | 27                         | 60              | 40              | PE           | fragment   | 0.67         | 3.8E-08                   | 3.6E-08  |
| KEOST2014-2015 #2 | 28                         | 50              | 50              | PET          | fragment   | 1.00         | 4.9E-08                   | 6.6E-08  |
| KEOST2014-2015 #2 | 29                         | 30              | 20              | PP           | fragment   | 0.67         | 4.7E-09                   | 4.3E-09  |
| KEOST2014-2015 #3 | 30                         | 60              | 60              | EVA          | fragment   | 1.00         | 8.5E-08                   | 7.9E-08  |
| KEOST2014-2015 #3 | 31                         | 30              | 20              | PE           | fragment   | 0.67         | 4.7E-09                   | 4.4E-09  |
| KEOST2014-2015 #3 | 32                         | 50              | 40              | PE           | fragment   | 0.80         | 3.1E-08                   | 3.0E-08  |
| KEOST2014-2015 #3 | 33                         | 30              | 30              | PE           | fragment   | 1.00         | 1.1E-08                   | 1.0E-08  |
| KEOST2014-2015 #3 | 34                         | 50              | 40              | PE           | fragment   | 0.80         | 3.1E-08                   | 3.0E-08  |
| KEOST2014-2015 #3 | 35                         | 60              | 50              | PE           | fragment   | 0.83         | 5.9E-08                   | 5.6E-08  |
| KEOST2014-2015 #3 | 36                         | 90              | 40              | PET          | fragment   | 0.44         | 5.7E-08                   | 7.6E-08  |
| KEOST2014-2015 #3 | 37                         | 70              | 50              | PET          | fragment   | 0.71         | 6.9E-08                   | 9.3E-08  |
| KEOST2014-2015 #3 | 38                         | 90              | 50              | PP           | fragment   | 0.56         | 8.8E-08                   | 8.0E-08  |
| KEOST2014-2015 #4 | 39                         | 200             | 160             | EVA          | fragment   | 0.80         | 2.0E-06                   | 1.9E-06  |
| KEOST2014-2015 #4 | 40                         | 50              | 20              | EVA          | fragment   | 0.40         | 7.9E-09                   | 7.3E-09  |

|                   |    |     |     |      |          |      |         |         |
|-------------------|----|-----|-----|------|----------|------|---------|---------|
| KEOST2014-2015 #4 | 41 | 50  | 50  | EVA  | fragment | 1.00 | 4.9E-08 | 4.6E-08 |
| KEOST2014-2015 #4 | 42 | 60  | 50  | EVA  | fragment | 0.83 | 5.9E-08 | 5.5E-08 |
| KEOST2014-2015 #4 | 43 | 60  | 50  | PA   | fragment | 0.83 | 5.9E-08 | 6.7E-08 |
| KEOST2014-2015 #4 | 44 | 30  | 20  | PE   | fragment | 0.67 | 4.7E-09 | 4.4E-09 |
| KEOST2014-2015 #4 | 45 | 100 | 80  | PE   | fragment | 0.80 | 2.5E-07 | 2.4E-07 |
| KEOST2014-2015 #4 | 46 | 70  | 50  | PE   | fragment | 0.71 | 6.9E-08 | 6.5E-08 |
| KEOST2014-2015 #4 | 47 | 60  | 30  | PE   | fragment | 0.50 | 2.1E-08 | 2.0E-08 |
| KEOST2014-2015 #4 | 48 | 40  | 30  | PE   | fragment | 0.75 | 1.4E-08 | 1.3E-08 |
| KEOST2014-2015 #4 | 49 | 40  | 40  | PE   | fragment | 1.00 | 2.5E-08 | 2.4E-08 |
| KEOST2014-2015 #4 | 50 | 30  | 30  | PE   | fragment | 1.00 | 1.1E-08 | 1.0E-08 |
| KEOST2014-2015 #4 | 51 | 40  | 30  | PE   | fragment | 0.75 | 1.4E-08 | 1.3E-08 |
| KEOST2014-2015 #4 | 52 | 40  | 30  | PE   | fragment | 0.75 | 1.4E-08 | 1.3E-08 |
| KEOST2014-2015 #4 | 53 | 50  | 40  | PE   | fragment | 0.80 | 3.1E-08 | 3.0E-08 |
| KEOST2014-2015 #4 | 54 | 90  | 70  | PE   | fragment | 0.78 | 1.7E-07 | 1.6E-07 |
| KEOST2014-2015 #4 | 55 | 200 | 60  | PET  | fiber    | -    | 2.3E-07 | 3.1E-07 |
| KEOST2014-2015 #4 | 56 | 140 | 30  | PET  | fiber    | -    | 4.0E-08 | 5.3E-08 |
| KEOST2014-2015 #4 | 57 | 50  | 40  | PP   | fragment | 0.80 | 3.1E-08 | 2.8E-08 |
| KEOST2014-2015 #4 | 58 | 40  | 20  | PS   | fragment | 0.50 | 6.3E-09 | 6.6E-09 |
| KEOST2014-2015 #5 | 59 | 30  | 30  | EP   | fragment | 1.00 | 1.1E-08 | 1.4E-08 |
| KEOST2014-2015 #5 | 60 | 50  | 50  | EVOH | fragment | 1.00 | 4.9E-08 | 5.6E-08 |
| KEOST2014-2015 #5 | 61 | 60  | 40  | EVOH | fragment | 0.67 | 3.8E-08 | 4.3E-08 |
| KEOST2014-2015 #5 | 62 | 30  | 20  | PA   | fragment | 0.67 | 4.7E-09 | 5.4E-09 |
| KEOST2014-2015 #5 | 63 | 60  | 40  | PE   | fragment | 0.67 | 3.8E-08 | 3.6E-08 |
| KEOST2014-2015 #5 | 64 | 30  | 30  | PE   | fragment | 1.00 | 1.1E-08 | 1.0E-08 |
| KEOST2014-2015 #5 | 65 | 40  | 30  | PE   | fragment | 0.75 | 1.4E-08 | 1.3E-08 |
| KEOST2014-2015 #5 | 66 | 100 | 60  | PE   | fragment | 0.60 | 1.4E-07 | 1.3E-07 |
| KEOST2014-2015 #5 | 67 | 30  | 30  | PE   | fragment | 1.00 | 1.1E-08 | 1.0E-08 |
| KEOST2014-2015 #5 | 68 | 120 | 70  | PE   | fragment | 0.58 | 2.3E-07 | 2.2E-07 |
| KEOST2014-2015 #5 | 69 | 50  | 40  | PE   | fragment | 0.80 | 3.1E-08 | 3.0E-08 |
| KEOST2014-2015 #5 | 70 | 40  | 30  | PP   | fragment | 0.75 | 1.4E-08 | 1.3E-08 |
| KEOST2014-2015 #6 | 71 | 40  | 20  | EVA  | fragment | 0.50 | 6.3E-09 | 5.8E-09 |
| KEOST2014-2015 #6 | 72 | 40  | 30  | EVA  | fragment | 0.75 | 1.4E-08 | 1.3E-08 |
| KEOST2014-2015 #6 | 73 | 50  | 50  | EVOH | fragment | 1.00 | 4.9E-08 | 5.6E-08 |
| KEOST2014-2015 #6 | 74 | 50  | 50  | EVOH | fragment | 1.00 | 4.9E-08 | 5.6E-08 |
| KEOST2014-2015 #6 | 75 | 60  | 40  | PA   | fragment | 0.67 | 3.8E-08 | 4.3E-08 |
| KEOST2014-2015 #6 | 76 | 210 | 110 | PA   | fragment | 0.52 | 1.0E-06 | 1.1E-06 |
| KEOST2014-2015 #6 | 77 | 80  | 70  | PA   | fragment | 0.88 | 1.5E-07 | 1.8E-07 |
| KEOST2014-2015 #6 | 78 | 30  | 20  | PE   | fragment | 0.67 | 4.7E-09 | 4.4E-09 |
| KEOST2014-2015 #6 | 79 | 40  | 30  | PE   | fragment | 0.75 | 1.4E-08 | 1.3E-08 |
| KEOST2014-2015 #6 | 80 | 30  | 30  | PE   | fragment | 1.00 | 1.1E-08 | 1.0E-08 |
| KEOST2014-2015 #6 | 81 | 40  | 30  | PE   | fragment | 0.75 | 1.4E-08 | 1.3E-08 |
| KEOST2014-2015 #6 | 82 | 40  | 40  | PE   | fragment | 1.00 | 2.5E-08 | 2.4E-08 |
| KEOST2014-2015 #6 | 83 | 40  | 20  | PE   | fragment | 0.50 | 6.3E-09 | 5.9E-09 |
| KEOST2014-2015 #6 | 84 | 30  | 20  | PE   | fragment | 0.67 | 4.7E-09 | 4.4E-09 |
| KEOST2014-2015 #6 | 85 | 30  | 20  | PE   | fragment | 0.67 | 4.7E-09 | 4.4E-09 |
| KEOST2014-2015 #6 | 86 | 210 | 30  | PET  | fiber    | -    | 5.9E-08 | 8.0E-08 |

|                    |     |     |     |      |          |      |         |         |
|--------------------|-----|-----|-----|------|----------|------|---------|---------|
| KEOST2014-2015 #6  | 87  | 610 | 40  | PP   | fiber    | -    | 3.1E-07 | 2.8E-07 |
| KEOST2014-2015 #6  | 88  | 100 | 60  | PVC  | fragment | 0.60 | 1.4E-07 | 2.0E-07 |
| KEOST2014-2015 #7  | 89  | 20  | 20  | EVA  | fragment | 1.00 | 3.1E-09 | 2.9E-09 |
| KEOST2014-2015 #7  | 90  | 40  | 40  | EVA  | fragment | 1.00 | 2.5E-08 | 2.3E-08 |
| KEOST2014-2015 #7  | 91  | 20  | 20  | EVA  | fragment | 1.00 | 3.1E-09 | 2.9E-09 |
| KEOST2014-2015 #7  | 92  | 40  | 40  | EVOH | fragment | 1.00 | 2.5E-08 | 2.9E-08 |
| KEOST2014-2015 #7  | 93  | 70  | 60  | EVOH | fragment | 0.86 | 9.9E-08 | 1.1E-07 |
| KEOST2014-2015 #7  | 94  | 50  | 40  | EVOH | fragment | 0.80 | 3.1E-08 | 3.6E-08 |
| KEOST2014-2015 #7  | 95  | 40  | 40  | EVOH | fragment | 1.00 | 2.5E-08 | 2.9E-08 |
| KEOST2014-2015 #7  | 96  | 40  | 30  | PE   | fragment | 0.75 | 1.4E-08 | 1.3E-08 |
| KEOST2014-2015 #7  | 97  | 190 | 100 | PE   | fragment | 0.53 | 7.5E-07 | 7.0E-07 |
| KEOST2014-2015 #7  | 98  | 50  | 40  | PE   | fragment | 0.80 | 3.1E-08 | 3.0E-08 |
| KEOST2014-2015 #7  | 99  | 60  | 30  | PP   | fragment | 0.50 | 2.1E-08 | 1.9E-08 |
| KEOST2014-2015 #8  | 100 | 40  | 40  | EVOH | fragment | 1.00 | 2.5E-08 | 2.9E-08 |
| KEOST2014-2015 #8  | 101 | 60  | 50  | EVOH | fragment | 0.83 | 5.9E-08 | 6.8E-08 |
| KEOST2014-2015 #8  | 102 | 80  | 30  | EVOH | fragment | 0.38 | 2.8E-08 | 3.3E-08 |
| KEOST2014-2015 #8  | 103 | 50  | 30  | EVOH | fragment | 0.60 | 1.8E-08 | 2.0E-08 |
| KEOST2014-2015 #8  | 104 | 50  | 40  | EVOH | fragment | 0.80 | 3.1E-08 | 3.6E-08 |
| KEOST2014-2015 #8  | 105 | 30  | 20  | PA   | fragment | 0.67 | 4.7E-09 | 5.4E-09 |
| KEOST2014-2015 #8  | 106 | 50  | 30  | PA   | fragment | 0.60 | 1.8E-08 | 2.0E-08 |
| KEOST2014-2015 #8  | 107 | 30  | 30  | PE   | fragment | 1.00 | 1.1E-08 | 1.0E-08 |
| KEOST2014-2015 #8  | 108 | 50  | 50  | PE   | fragment | 1.00 | 4.9E-08 | 4.6E-08 |
| KEOST2014-2015 #8  | 109 | 40  | 40  | PE   | fragment | 1.00 | 2.5E-08 | 2.4E-08 |
| KEOST2014-2015 #8  | 110 | 30  | 20  | PP   | fragment | 0.67 | 4.7E-09 | 4.3E-09 |
| KEOST2014-2015 #8  | 111 | 60  | 60  | PU   | fragment | 1.00 | 8.5E-08 | 1.0E-07 |
| KEOST2014-2015 #9  | 112 | 40  | 20  | EVA  | fragment | 0.50 | 6.3E-09 | 5.8E-09 |
| KEOST2014-2015 #9  | 113 | 70  | 50  | PE   | fragment | 0.71 | 6.9E-08 | 6.5E-08 |
| KEOST2014-2015 #9  | 114 | 50  | 50  | PE   | fragment | 1.00 | 4.9E-08 | 4.6E-08 |
| KEOST2014-2015 #9  | 115 | 40  | 30  | PE   | fragment | 0.75 | 1.4E-08 | 1.3E-08 |
| KEOST2014-2015 #9  | 116 | 40  | 40  | PE   | fragment | 1.00 | 2.5E-08 | 2.4E-08 |
| KEOST2014-2015 #9  | 117 | 90  | 60  | PE   | fragment | 0.67 | 1.3E-07 | 1.2E-07 |
| KEOST2014-2015 #9  | 118 | 40  | 40  | PE   | fragment | 1.00 | 2.5E-08 | 2.4E-08 |
| KEOST2014-2015 #9  | 119 | 40  | 20  | PE   | fragment | 0.50 | 6.3E-09 | 5.9E-09 |
| KEOST2014-2015 #9  | 120 | 30  | 30  | PE   | fragment | 1.00 | 1.1E-08 | 1.0E-08 |
| KEOST2014-2015 #9  | 121 | 80  | 30  | PE   | fragment | 0.38 | 2.8E-08 | 2.7E-08 |
| KEOST2014-2015 #9  | 122 | 30  | 30  | PE   | fragment | 1.00 | 1.1E-08 | 1.0E-08 |
| KEOST2014-2015 #9  | 123 | 40  | 30  | PP   | fragment | 0.75 | 1.4E-08 | 1.3E-08 |
| KEOST2014-2015 #9  | 124 | 40  | 40  | PVC  | fragment | 1.00 | 2.5E-08 | 3.6E-08 |
| KEOST2014-2015 #10 | 125 | 60  | 40  | EVA  | fragment | 0.67 | 3.8E-08 | 3.5E-08 |
| KEOST2014-2015 #10 | 126 | 60  | 50  | EVOH | fragment | 0.83 | 5.9E-08 | 6.8E-08 |
| KEOST2014-2015 #10 | 127 | 60  | 50  | EVOH | fragment | 0.83 | 5.9E-08 | 6.8E-08 |
| KEOST2014-2015 #10 | 128 | 50  | 40  | EVOH | fragment | 0.80 | 3.1E-08 | 3.6E-08 |
| KEOST2014-2015 #10 | 129 | 50  | 30  | PA   | fragment | 0.60 | 1.8E-08 | 2.0E-08 |
| KEOST2014-2015 #10 | 130 | 30  | 20  | PA   | fragment | 0.67 | 4.7E-09 | 5.4E-09 |
| KEOST2014-2015 #10 | 131 | 80  | 50  | PC   | fragment | 0.63 | 7.9E-08 | 1.0E-07 |
| KEOST2014-2015 #10 | 132 | 50  | 30  | PE   | fragment | 0.60 | 1.8E-08 | 1.7E-08 |

|                    |     |     |     |      |          |      |         |         |
|--------------------|-----|-----|-----|------|----------|------|---------|---------|
| KEOST2014-2015 #10 | 133 | 30  | 20  | PE   | fragment | 0.67 | 4.7E-09 | 4.4E-09 |
| KEOST2014-2015 #10 | 134 | 40  | 40  | PE   | fragment | 1.00 | 2.5E-08 | 2.4E-08 |
| KEOST2014-2015 #10 | 135 | 100 | 40  | PE   | fragment | 0.40 | 6.3E-08 | 5.9E-08 |
| KEOST2014-2015 #10 | 136 | 140 | 40  | PET  | fragment | 0.29 | 8.8E-08 | 1.2E-07 |
| KEOST2014-2015 #10 | 137 | 50  | 40  | PP   | fragment | 0.80 | 3.1E-08 | 2.8E-08 |
| KEOST2014-2015 #10 | 138 | 30  | 30  | PU   | fragment | 1.00 | 1.1E-08 | 1.2E-08 |
| KEOST2014-2015 #11 | 139 | 50  | 40  | EVA  | fragment | 0.80 | 3.1E-08 | 2.9E-08 |
| KEOST2014-2015 #11 | 140 | 70  | 50  | EVOH | fragment | 0.71 | 6.9E-08 | 7.9E-08 |
| KEOST2014-2015 #11 | 141 | 50  | 40  | PA   | fragment | 0.80 | 3.1E-08 | 3.6E-08 |
| KEOST2014-2015 #11 | 142 | 30  | 30  | PE   | fragment | 1.00 | 1.1E-08 | 1.0E-08 |
| KEOST2014-2015 #11 | 143 | 240 | 40  | PE   | fiber    | -    | 1.2E-07 | 1.1E-07 |
| KEOST2014-2015 #11 | 144 | 30  | 30  | PE   | fragment | 1.00 | 1.1E-08 | 1.0E-08 |
| KEOST2014-2015 #11 | 145 | 130 | 80  | PMMA | fragment | 0.62 | 3.3E-07 | 3.9E-07 |
| KEOST2014-2015 #11 | 146 | 40  | 40  | PMP  | fragment | 1.00 | 2.5E-08 | 2.1E-08 |
| KEOST2014-2015 #11 | 147 | 200 | 60  | PVC  | fragment | 0.30 | 2.8E-07 | 4.0E-07 |
| KEOST2014-2015 #11 | 148 | 60  | 50  | PVC  | fragment | 0.83 | 5.9E-08 | 8.4E-08 |
| KEOST2014-2015 #12 | 149 | 30  | 30  | ABS  | fragment | 1.00 | 1.1E-08 | 1.2E-08 |
| KEOST2014-2015 #12 | 150 | 190 | 190 | EP   | fragment | 1.00 | 2.7E-06 | 3.5E-06 |
| KEOST2014-2015 #12 | 151 | 470 | 240 | EVA  | fragment | 0.51 | 1.1E-05 | 9.9E-06 |
| KEOST2014-2015 #12 | 152 | 80  | 50  | EVOH | fragment | 0.63 | 7.9E-08 | 9.0E-08 |
| KEOST2014-2015 #12 | 153 | 40  | 30  | EVOH | fragment | 0.75 | 1.4E-08 | 1.6E-08 |
| KEOST2014-2015 #12 | 154 | 160 | 50  | PE   | fragment | 0.31 | 1.6E-07 | 1.5E-07 |
| KEOST2014-2015 #12 | 155 | 760 | 30  | PET  | fiber    | -    | 2.1E-07 | 2.9E-07 |
| KEOST2014-2015 #12 | 156 | 40  | 30  | PU   | fragment | 0.75 | 1.4E-08 | 1.7E-08 |
| KEOST2014-2015 #13 | 157 | 300 | 290 | EVA  | fragment | 0.97 | 9.9E-06 | 9.2E-06 |
| KEOST2014-2015 #13 | 158 | 50  | 30  | PA   | fragment | 0.60 | 1.8E-08 | 2.0E-08 |
| KEOST2014-2015 #13 | 159 | 20  | 20  | PE   | fragment | 1.00 | 3.1E-09 | 3.0E-09 |
| KEOST2014-2015 #13 | 160 | 100 | 70  | PE   | fragment | 0.70 | 1.9E-07 | 1.8E-07 |
| KEOST2014-2015 #13 | 161 | 50  | 40  | PP   | fragment | 0.80 | 3.1E-08 | 2.8E-08 |
| KEOST2014-2015 #13 | 162 | 30  | 30  | PP   | fragment | 1.00 | 1.1E-08 | 9.6E-09 |
| KEOST2014-2015 #13 | 163 | 200 | 30  | PP   | fiber    | -    | 5.7E-08 | 5.1E-08 |
| KEOST2014-2015 #13 | 164 | 40  | 30  | PP   | fragment | 0.75 | 1.4E-08 | 1.3E-08 |
| KEOST2014-2015 #13 | 165 | 90  | 30  | PP   | fragment | 0.33 | 3.2E-08 | 2.9E-08 |
| KEOST2014-2015 #13 | 166 | 70  | 50  | PVC  | fragment | 0.71 | 6.9E-08 | 9.8E-08 |
| KEOST2014-2015 #14 | 167 | 270 | 20  | EP   | fiber    | -    | 3.4E-08 | 4.4E-08 |
| KEOST2014-2015 #14 | 168 | 50  | 30  | EVA  | fragment | 0.60 | 1.8E-08 | 1.6E-08 |
| KEOST2014-2015 #14 | 169 | 80  | 50  | EVA  | fragment | 0.63 | 7.9E-08 | 7.3E-08 |
| KEOST2014-2015 #14 | 170 | 50  | 50  | EVOH | fragment | 1.00 | 4.9E-08 | 5.6E-08 |
| KEOST2014-2015 #14 | 171 | 50  | 30  | PA   | fragment | 0.60 | 1.8E-08 | 2.0E-08 |
| KEOST2014-2015 #14 | 172 | 20  | 20  | PA   | fragment | 1.00 | 3.1E-09 | 3.6E-09 |
| KEOST2014-2015 #14 | 173 | 40  | 40  | PE   | fragment | 1.00 | 2.5E-08 | 2.4E-08 |
| KEOST2014-2015 #14 | 174 | 80  | 60  | PE   | fragment | 0.75 | 1.1E-07 | 1.1E-07 |
| KEOST2014-2015 #14 | 175 | 250 | 30  | PET  | fiber    | -    | 7.1E-08 | 9.5E-08 |
| KEOST2014-2015 #14 | 176 | 120 | 50  | PET  | fiber    | -    | 9.4E-08 | 1.3E-07 |
| KEOST2014-2015 #14 | 177 | 140 | 40  | PET  | fragment | 0.29 | 8.8E-08 | 1.2E-07 |
| KEOST2014-2015 #14 | 178 | 40  | 30  | POM  | fragment | 0.75 | 1.4E-08 | 2.0E-08 |

|                    |     |     |     |      |          |      |         |         |
|--------------------|-----|-----|-----|------|----------|------|---------|---------|
| KEOST2014-2015 #14 | 179 | 100 | 60  | PP   | fragment | 0.60 | 1.4E-07 | 1.3E-07 |
| KEOST2014-2015 #14 | 180 | 70  | 50  | PP   | fragment | 0.71 | 6.9E-08 | 6.2E-08 |
| KEOST2014-2015 #14 | 181 | 70  | 50  | PU   | fragment | 0.71 | 6.9E-08 | 8.1E-08 |
| KEOST2014-2015 #15 | 182 | 80  | 50  | EP   | fragment | 0.63 | 7.9E-08 | 1.0E-07 |
| KEOST2014-2015 #15 | 183 | 70  | 40  | EP   | fragment | 0.57 | 4.4E-08 | 5.7E-08 |
| KEOST2014-2015 #15 | 184 | 60  | 60  | EVA  | fragment | 1.00 | 8.5E-08 | 7.9E-08 |
| KEOST2014-2015 #15 | 185 | 50  | 50  | EVOH | fragment | 1.00 | 4.9E-08 | 5.6E-08 |
| KEOST2014-2015 #15 | 186 | 50  | 30  | PE   | fragment | 0.60 | 1.8E-08 | 1.7E-08 |
| KEOST2014-2015 #15 | 187 | 30  | 30  | PE   | fragment | 1.00 | 1.1E-08 | 1.0E-08 |
| KEOST2014-2015 #15 | 188 | 40  | 20  | PET  | fragment | 0.50 | 6.3E-09 | 8.5E-09 |
| KEOST2014-2015 #15 | 189 | 40  | 40  | PP   | fragment | 1.00 | 2.5E-08 | 2.3E-08 |
| KEOST2014-2015 #16 | 190 | 510 | 30  | EP   | fiber    | -    | 1.4E-07 | 1.9E-07 |
| KEOST2014-2015 #16 | 191 | 480 | 180 | PA   | fragment | 0.38 | 6.1E-06 | 7.0E-06 |
| KEOST2014-2015 #16 | 192 | 50  | 30  | PE   | fragment | 0.60 | 1.8E-08 | 1.7E-08 |
| KEOST2014-2015 #16 | 193 | 80  | 20  | POM  | fragment | 0.25 | 1.3E-08 | 1.8E-08 |
| KEOST2014-2015 #16 | 194 | 70  | 30  | PP   | fragment | 0.43 | 2.5E-08 | 2.2E-08 |
| KEOST2014-2015 #16 | 195 | 60  | 40  | PU   | fragment | 0.67 | 3.8E-08 | 4.4E-08 |
| KEOST2014-2015 #17 | 196 | 40  | 30  | EVA  | fragment | 0.75 | 1.4E-08 | 1.3E-08 |
| KEOST2014-2015 #17 | 197 | 50  | 50  | EVOH | fragment | 1.00 | 4.9E-08 | 5.6E-08 |
| KEOST2014-2015 #17 | 198 | 40  | 20  | PE   | fragment | 0.50 | 6.3E-09 | 5.9E-09 |
| KEOST2014-2015 #17 | 199 | 40  | 30  | PE   | fragment | 0.75 | 1.4E-08 | 1.3E-08 |
| KEOST2014-2015 #17 | 200 | 40  | 30  | PE   | fragment | 0.75 | 1.4E-08 | 1.3E-08 |
| KEOST2014-2015 #17 | 201 | 450 | 30  | PET  | fiber    | -    | 1.3E-07 | 1.7E-07 |
| KEOST2014-2015 #17 | 202 | 800 | 40  | PET  | fiber    | -    | 4.0E-07 | 5.4E-07 |
| KEOST2014-2015 #17 | 203 | 350 | 40  | PET  | fiber    | -    | 1.8E-07 | 2.4E-07 |
| KEOST2014-2015 #17 | 204 | 100 | 30  | PET  | fiber    | -    | 2.8E-08 | 3.8E-08 |
| KEOST2014-2015 #17 | 205 | 150 | 130 | PVC  | fragment | 0.87 | 1.0E-06 | 1.4E-06 |
| KEOST2014-2015 #18 | 206 | 50  | 50  | EVOH | fragment | 1.00 | 4.9E-08 | 5.6E-08 |
| KEOST2014-2015 #18 | 207 | 50  | 40  | EVOH | fragment | 0.80 | 3.1E-08 | 3.6E-08 |
| KEOST2014-2015 #18 | 208 | 50  | 40  | PA   | fragment | 0.80 | 3.1E-08 | 3.6E-08 |
| KEOST2014-2015 #18 | 209 | 30  | 30  | PE   | fragment | 1.00 | 1.1E-08 | 1.0E-08 |
| KEOST2014-2015 #18 | 210 | 30  | 20  | PE   | fragment | 0.67 | 4.7E-09 | 4.4E-09 |
| KEOST2014-2015 #18 | 211 | 50  | 40  | PE   | fragment | 0.80 | 3.1E-08 | 3.0E-08 |
| KEOST2014-2015 #18 | 212 | 140 | 30  | PE   | fiber    | -    | 4.0E-08 | 3.7E-08 |
| KEOST2014-2015 #19 | 213 | 30  | 20  | EP   | fragment | 0.67 | 4.7E-09 | 6.1E-09 |
| KEOST2014-2015 #19 | 214 | 200 | 90  | EVA  | fragment | 0.45 | 6.4E-07 | 5.9E-07 |
| KEOST2014-2015 #19 | 215 | 60  | 40  | EVOH | fragment | 0.67 | 3.8E-08 | 4.3E-08 |
| KEOST2014-2015 #19 | 216 | 30  | 30  | PA   | fragment | 1.00 | 1.1E-08 | 1.2E-08 |
| KEOST2014-2015 #19 | 217 | 40  | 30  | PE   | fragment | 0.75 | 1.4E-08 | 1.3E-08 |
| KEOST2014-2015 #19 | 218 | 30  | 20  | PE   | fragment | 0.67 | 4.7E-09 | 4.4E-09 |
| KEOST2014-2015 #19 | 219 | 40  | 40  | PE   | fragment | 1.00 | 2.5E-08 | 2.4E-08 |
| KEOST2014-2015 #19 | 220 | 30  | 30  | PMP  | fragment | 1.00 | 1.1E-08 | 8.9E-09 |
| KEOST2014-2015 #20 | 221 | 60  | 60  | EP   | fragment | 1.00 | 8.5E-08 | 1.1E-07 |
| KEOST2014-2015 #20 | 222 | 50  | 50  | EVA  | fragment | 1.00 | 4.9E-08 | 4.6E-08 |
| KEOST2014-2015 #20 | 223 | 30  | 20  | PE   | fragment | 0.67 | 4.7E-09 | 4.4E-09 |
| KEOST2014-2015 #20 | 224 | 50  | 40  | PE   | fragment | 0.80 | 3.1E-08 | 3.0E-08 |

|                    |     |     |     |      |          |      |         |         |
|--------------------|-----|-----|-----|------|----------|------|---------|---------|
| KEOST2014-2015 #20 | 225 | 40  | 30  | PP   | fragment | 0.75 | 1.4E-08 | 1.3E-08 |
| KEOST2014-2015 #20 | 226 | 50  | 40  | PS   | fragment | 0.80 | 3.1E-08 | 3.3E-08 |
| KEOST2014-2015 #20 | 227 | 40  | 30  | PU   | fragment | 0.75 | 1.4E-08 | 1.7E-08 |
| KEOST2014-2015 #20 | 228 | 40  | 40  | PU   | fragment | 1.00 | 2.5E-08 | 3.0E-08 |
| KEOST2014-2015 #21 | 229 | 50  | 40  | ABS  | fragment | 0.80 | 3.1E-08 | 3.5E-08 |
| KEOST2014-2015 #21 | 230 | 40  | 30  | EP   | fragment | 0.75 | 1.4E-08 | 1.8E-08 |
| KEOST2014-2015 #21 | 231 | 60  | 50  | EVOH | fragment | 0.83 | 5.9E-08 | 6.8E-08 |
| KEOST2014-2015 #21 | 232 | 30  | 30  | EVOH | fragment | 1.00 | 1.1E-08 | 1.2E-08 |
| KEOST2014-2015 #21 | 233 | 80  | 60  | PA   | fragment | 0.75 | 1.1E-07 | 1.3E-07 |
| KEOST2014-2015 #21 | 234 | 50  | 30  | PA   | fragment | 0.60 | 1.8E-08 | 2.0E-08 |
| KEOST2014-2015 #21 | 235 | 90  | 70  | PC   | fragment | 0.78 | 1.7E-07 | 2.3E-07 |
| KEOST2014-2015 #21 | 236 | 60  | 60  | PE   | fragment | 1.00 | 8.5E-08 | 8.0E-08 |
| KEOST2014-2015 #21 | 237 | 50  | 30  | PMP  | fragment | 0.60 | 1.8E-08 | 1.5E-08 |
| KEOST2014-2015 #21 | 238 | 50  | 50  | PVC  | fragment | 1.00 | 4.9E-08 | 7.0E-08 |
| KEOST2015-2016 #1  | 239 | 50  | 40  | ABS  | fragment | 0.80 | 3.1E-08 | 3.5E-08 |
| KEOST2015-2016 #1  | 240 | 50  | 40  | EVA  | fragment | 0.80 | 3.1E-08 | 2.9E-08 |
| KEOST2015-2016 #1  | 241 | 120 | 50  | EVA  | fragment | 0.42 | 1.2E-07 | 1.1E-07 |
| KEOST2015-2016 #1  | 242 | 30  | 30  | PBT  | fragment | 1.00 | 1.1E-08 | 1.4E-08 |
| KEOST2015-2016 #1  | 243 | 60  | 50  | PE   | fragment | 0.83 | 5.9E-08 | 5.6E-08 |
| KEOST2015-2016 #1  | 244 | 110 | 100 | PE   | fragment | 0.91 | 4.3E-07 | 4.1E-07 |
| KEOST2015-2016 #1  | 245 | 80  | 30  | PET  | fragment | 0.38 | 2.8E-08 | 3.8E-08 |
| KEOST2015-2016 #1  | 246 | 340 | 20  | PP   | fiber    | -    | 4.3E-08 | 3.9E-08 |
| KEOST2015-2016 #1  | 247 | 180 | 20  | PTFE | fiber    | -    | 2.3E-08 | 4.9E-08 |
| KEOST2015-2016 #1  | 248 | 40  | 40  | PVC  | fragment | 1.00 | 2.5E-08 | 3.6E-08 |
| KEOST2015-2016 #2  | 249 | 50  | 40  | EP   | fragment | 0.80 | 3.1E-08 | 4.1E-08 |
| KEOST2015-2016 #2  | 250 | 50  | 40  | EVA  | fragment | 0.80 | 3.1E-08 | 2.9E-08 |
| KEOST2015-2016 #2  | 251 | 170 | 110 | EVA  | fragment | 0.65 | 8.1E-07 | 7.5E-07 |
| KEOST2015-2016 #2  | 252 | 60  | 50  | EVA  | fragment | 0.83 | 5.9E-08 | 5.5E-08 |
| KEOST2015-2016 #2  | 253 | 180 | 110 | EVA  | fragment | 0.61 | 8.6E-07 | 8.0E-07 |
| KEOST2015-2016 #2  | 254 | 50  | 40  | EVOH | fragment | 0.80 | 3.1E-08 | 3.6E-08 |
| KEOST2015-2016 #2  | 255 | 60  | 30  | PE   | fragment | 0.50 | 2.1E-08 | 2.0E-08 |
| KEOST2015-2016 #2  | 256 | 60  | 50  | PE   | fragment | 0.83 | 5.9E-08 | 5.6E-08 |
| KEOST2015-2016 #2  | 257 | 50  | 40  | PE   | fragment | 0.80 | 3.1E-08 | 3.0E-08 |
| KEOST2015-2016 #2  | 258 | 40  | 30  | PET  | fragment | 0.75 | 1.4E-08 | 1.9E-08 |
| KEOST2015-2016 #2  | 259 | 170 | 120 | PVC  | fragment | 0.71 | 9.6E-07 | 1.4E-06 |
| KEOST2015-2016 #3  | 260 | 50  | 30  | EVOH | fragment | 0.60 | 1.8E-08 | 2.0E-08 |
| KEOST2015-2016 #3  | 261 | 40  | 30  | EVOH | fragment | 0.75 | 1.4E-08 | 1.6E-08 |
| KEOST2015-2016 #3  | 262 | 60  | 40  | PA   | fragment | 0.67 | 3.8E-08 | 4.3E-08 |
| KEOST2015-2016 #3  | 263 | 50  | 40  | PBT  | fragment | 0.80 | 3.1E-08 | 4.2E-08 |
| KEOST2015-2016 #3  | 264 | 590 | 40  | PET  | fiber    | -    | 3.0E-07 | 4.0E-07 |
| KEOST2015-2016 #3  | 265 | 100 | 40  | PET  | fragment | 0.40 | 6.3E-08 | 8.5E-08 |
| KEOST2015-2016 #3  | 266 | 250 | 100 | PET  | fragment | 0.40 | 9.8E-07 | 1.3E-06 |
| KEOST2015-2016 #4  | 267 | 40  | 30  | PA   | fragment | 0.75 | 1.4E-08 | 1.6E-08 |
| KEOST2015-2016 #4  | 268 | 30  | 20  | PA   | fragment | 0.67 | 4.7E-09 | 5.4E-09 |
| KEOST2015-2016 #4  | 269 | 70  | 50  | PA   | fragment | 0.71 | 6.9E-08 | 7.8E-08 |
| KEOST2015-2016 #4  | 270 | 350 | 90  | PE   | fragment | 0.26 | 1.1E-06 | 1.1E-06 |

|                   |     |     |    |      |          |      |         |         |
|-------------------|-----|-----|----|------|----------|------|---------|---------|
| KEOST2015-2016 #4 | 271 | 30  | 20 | PE   | fragment | 0.67 | 4.7E-09 | 4.4E-09 |
| KEOST2015-2016 #4 | 272 | 40  | 30 | PP   | fragment | 0.75 | 1.4E-08 | 1.3E-08 |
| KEOST2015-2016 #4 | 273 | 60  | 60 | PP   | fragment | 1.00 | 8.5E-08 | 7.7E-08 |
| KEOST2015-2016 #4 | 274 | 50  | 40 | PP   | fragment | 0.80 | 3.1E-08 | 2.8E-08 |
| KEOST2015-2016 #5 | 275 | 80  | 50 | EVA  | fragment | 0.63 | 7.9E-08 | 7.3E-08 |
| KEOST2015-2016 #5 | 276 | 50  | 40 | EVOH | fragment | 0.80 | 3.1E-08 | 3.6E-08 |
| KEOST2015-2016 #5 | 277 | 60  | 50 | EVOH | fragment | 0.83 | 5.9E-08 | 6.8E-08 |
| KEOST2015-2016 #5 | 278 | 120 | 70 | PE   | fragment | 0.58 | 2.3E-07 | 2.2E-07 |
| KEOST2015-2016 #5 | 279 | 100 | 40 | PE   | fragment | 0.40 | 6.3E-08 | 5.9E-08 |
| KEOST2015-2016 #5 | 280 | 60  | 30 | PE   | fragment | 0.50 | 2.1E-08 | 2.0E-08 |
| KEOST2015-2016 #5 | 281 | 40  | 30 | PE   | fragment | 0.75 | 1.4E-08 | 1.3E-08 |
| KEOST2015-2016 #5 | 282 | 70  | 40 | PE   | fragment | 0.57 | 4.4E-08 | 4.1E-08 |
| KEOST2015-2016 #5 | 283 | 50  | 40 | PP   | fragment | 0.80 | 3.1E-08 | 2.8E-08 |
| KEOST2015-2016 #5 | 284 | 60  | 40 | PP   | fragment | 0.67 | 3.8E-08 | 3.4E-08 |
| KEOST2015-2016 #6 | 285 | 100 | 80 | EP   | fragment | 0.80 | 2.5E-07 | 3.3E-07 |
| KEOST2015-2016 #6 | 286 | 30  | 30 | PA   | fragment | 1.00 | 1.1E-08 | 1.2E-08 |
| KEOST2015-2016 #6 | 287 | 50  | 40 | PE   | fragment | 0.80 | 3.1E-08 | 3.0E-08 |
| KEOST2015-2016 #6 | 288 | 90  | 50 | PE   | fragment | 0.56 | 8.8E-08 | 8.3E-08 |
| KEOST2015-2016 #6 | 289 | 60  | 50 | PE   | fragment | 0.83 | 5.9E-08 | 5.6E-08 |
| KEOST2015-2016 #6 | 290 | 180 | 20 | PE   | fiber    | -    | 2.3E-08 | 2.1E-08 |
| KEOST2015-2016 #6 | 291 | 170 | 70 | PVC  | fragment | 0.41 | 3.3E-07 | 4.7E-07 |
| KEOST2015-2016 #7 | 292 | 150 | 80 | EP   | fragment | 0.53 | 3.8E-07 | 4.9E-07 |
| KEOST2015-2016 #7 | 293 | 50  | 40 | EVOH | fragment | 0.80 | 3.1E-08 | 3.6E-08 |
| KEOST2015-2016 #7 | 294 | 60  | 50 | EVOH | fragment | 0.83 | 5.9E-08 | 6.8E-08 |
| KEOST2015-2016 #7 | 295 | 50  | 50 | EVOH | fragment | 1.00 | 4.9E-08 | 5.6E-08 |
| KEOST2015-2016 #7 | 296 | 80  | 50 | PA   | fragment | 0.63 | 7.9E-08 | 9.0E-08 |
| KEOST2015-2016 #7 | 297 | 30  | 20 | PA   | fragment | 0.67 | 4.7E-09 | 5.4E-09 |
| KEOST2015-2016 #7 | 298 | 80  | 40 | PE   | fragment | 0.50 | 5.0E-08 | 4.7E-08 |
| KEOST2015-2016 #7 | 299 | 80  | 60 | PE   | fragment | 0.75 | 1.1E-07 | 1.1E-07 |
| KEOST2015-2016 #7 | 300 | 220 | 80 | PET  | fragment | 0.36 | 5.5E-07 | 7.5E-07 |
| KEOST2015-2016 #7 | 301 | 110 | 30 | PP   | fragment | 0.27 | 3.9E-08 | 3.5E-08 |
| KEOST2015-2016 #7 | 302 | 600 | 20 | PVC  | fiber    | -    | 7.5E-08 | 1.1E-07 |
| KEOST2015-2016 #8 | 303 | 80  | 40 | EVA  | fragment | 0.50 | 5.0E-08 | 4.7E-08 |
| KEOST2015-2016 #8 | 304 | 60  | 50 | PA   | fragment | 0.83 | 5.9E-08 | 6.7E-08 |
| KEOST2015-2016 #8 | 305 | 60  | 40 | PE   | fragment | 0.67 | 3.8E-08 | 3.6E-08 |
| KEOST2015-2016 #8 | 306 | 260 | 20 | PET  | fiber    | -    | 3.3E-08 | 4.4E-08 |
| KEOST2015-2016 #8 | 307 | 390 | 30 | PET  | fiber    | -    | 1.1E-07 | 1.5E-07 |
| KEOST2015-2016 #8 | 308 | 40  | 30 | PP   | fragment | 0.75 | 1.4E-08 | 1.3E-08 |
| KEOST2015-2016 #9 | 309 | 50  | 40 | EVOH | fragment | 0.80 | 3.1E-08 | 3.6E-08 |
| KEOST2015-2016 #9 | 310 | 40  | 40 | EVOH | fragment | 1.00 | 2.5E-08 | 2.9E-08 |
| KEOST2015-2016 #9 | 311 | 40  | 20 | PA   | fragment | 0.50 | 6.3E-09 | 7.2E-09 |
| KEOST2015-2016 #9 | 312 | 50  | 40 | PA   | fragment | 0.80 | 3.1E-08 | 3.6E-08 |
| KEOST2015-2016 #9 | 313 | 50  | 50 | PBT  | fragment | 1.00 | 4.9E-08 | 6.6E-08 |
| KEOST2015-2016 #9 | 314 | 40  | 30 | PE   | fragment | 0.75 | 1.4E-08 | 1.3E-08 |
| KEOST2015-2016 #9 | 315 | 60  | 50 | PE   | fragment | 0.83 | 5.9E-08 | 5.6E-08 |
| KEOST2015-2016 #9 | 316 | 40  | 20 | PE   | fragment | 0.50 | 6.3E-09 | 5.9E-09 |



|                    |     |     |     |      |          |      |         |         |
|--------------------|-----|-----|-----|------|----------|------|---------|---------|
| KEOST2015-2016 #9  | 317 | 40  | 40  | PE   | fragment | 1.00 | 2.5E-08 | 2.4E-08 |
| KEOST2015-2016 #9  | 318 | 60  | 50  | PE   | fragment | 0.83 | 5.9E-08 | 5.6E-08 |
| KEOST2015-2016 #9  | 319 | 250 | 40  | PET  | fiber    | -    | 1.3E-07 | 1.7E-07 |
| KEOST2015-2016 #9  | 320 | 50  | 40  | PP   | fragment | 0.80 | 3.1E-08 | 2.8E-08 |
| KEOST2015-2016 #10 | 321 | 60  | 30  | EVOH | fragment | 0.50 | 2.1E-08 | 2.4E-08 |
| KEOST2015-2016 #10 | 322 | 50  | 40  | PA   | fragment | 0.80 | 3.1E-08 | 3.6E-08 |
| KEOST2015-2016 #10 | 323 | 30  | 30  | PE   | fragment | 1.00 | 1.1E-08 | 1.0E-08 |
| KEOST2015-2016 #10 | 324 | 80  | 60  | PE   | fragment | 0.75 | 1.1E-07 | 1.1E-07 |
| KEOST2015-2016 #10 | 325 | 50  | 40  | PE   | fragment | 0.80 | 3.1E-08 | 3.0E-08 |
| KEOST2015-2016 #10 | 326 | 70  | 50  | PE   | fragment | 0.71 | 6.9E-08 | 6.5E-08 |
| KEOST2015-2016 #10 | 327 | 30  | 30  | PET  | fragment | 1.00 | 1.1E-08 | 1.4E-08 |
| KEOST2015-2016 #10 | 328 | 40  | 30  | PET  | fragment | 0.75 | 1.4E-08 | 1.9E-08 |
| KEOST2015-2016 #10 | 329 | 310 | 20  | PU   | fiber    | -    | 3.9E-08 | 4.6E-08 |
| KEOST2015-2016 #11 | 330 | 30  | 20  | PA   | fragment | 0.67 | 4.7E-09 | 5.4E-09 |
| KEOST2015-2016 #11 | 331 | 60  | 50  | PA   | fragment | 0.83 | 5.9E-08 | 6.7E-08 |
| KEOST2015-2016 #11 | 332 | 40  | 30  | PA   | fragment | 0.75 | 1.4E-08 | 1.6E-08 |
| KEOST2015-2016 #11 | 333 | 50  | 40  | PA   | fragment | 0.80 | 3.1E-08 | 3.6E-08 |
| KEOST2015-2016 #11 | 334 | 30  | 30  | PA   | fragment | 1.00 | 1.1E-08 | 1.2E-08 |
| KEOST2015-2016 #11 | 335 | 40  | 30  | PE   | fragment | 0.75 | 1.4E-08 | 1.3E-08 |
| KEOST2015-2016 #11 | 336 | 40  | 20  | PE   | fragment | 0.50 | 6.3E-09 | 5.9E-09 |
| KEOST2015-2016 #11 | 337 | 60  | 60  | PE   | fragment | 1.00 | 8.5E-08 | 8.0E-08 |
| KEOST2015-2016 #11 | 338 | 50  | 30  | PE   | fragment | 0.60 | 1.8E-08 | 1.7E-08 |
| KEOST2015-2016 #11 | 339 | 400 | 30  | PET  | fiber    | -    | 1.1E-07 | 1.5E-07 |
| KEOST2015-2016 #11 | 340 | 240 | 100 | PET  | fragment | 0.42 | 9.4E-07 | 1.3E-06 |
| KEOST2015-2016 #11 | 341 | 110 | 40  | PP   | fragment | 0.36 | 6.9E-08 | 6.3E-08 |
| KEOST2015-2016 #12 | 342 | 140 | 30  | ABS  | fragment | 0.21 | 4.9E-08 | 5.5E-08 |
| KEOST2015-2016 #12 | 343 | 70  | 50  | EVA  | fragment | 0.71 | 6.9E-08 | 6.4E-08 |
| KEOST2015-2016 #12 | 344 | 40  | 30  | PE   | fragment | 0.75 | 1.4E-08 | 1.3E-08 |
| KEOST2015-2016 #12 | 345 | 160 | 20  | PE   | fiber    | -    | 2.0E-08 | 1.9E-08 |
| KEOST2015-2016 #12 | 346 | 60  | 60  | PE   | fragment | 1.00 | 8.5E-08 | 8.0E-08 |
| KEOST2015-2016 #12 | 347 | 50  | 30  | PE   | fragment | 0.60 | 1.8E-08 | 1.7E-08 |
| KEOST2015-2016 #12 | 348 | 60  | 50  | PET  | fragment | 0.83 | 5.9E-08 | 8.0E-08 |
| KEOST2015-2016 #12 | 349 | 80  | 30  | PET  | fiber    | -    | 2.3E-08 | 3.1E-08 |
| KEOST2015-2016 #13 | 350 | 110 | 70  | EVA  | fragment | 0.64 | 2.1E-07 | 2.0E-07 |
| KEOST2015-2016 #13 | 351 | 120 | 60  | PA   | fragment | 0.50 | 1.7E-07 | 1.9E-07 |
| KEOST2015-2016 #13 | 352 | 110 | 20  | PE   | fiber    | -    | 1.4E-08 | 1.3E-08 |
| KEOST2015-2016 #13 | 353 | 50  | 40  | PE   | fragment | 0.80 | 3.1E-08 | 3.0E-08 |
| KEOST2015-2016 #13 | 354 | 100 | 20  | PET  | fiber    | -    | 1.3E-08 | 1.7E-08 |
| KEOST2015-2016 #13 | 355 | 190 | 40  | PET  | fragment | 0.21 | 1.2E-07 | 1.6E-07 |
| KEOST2015-2016 #13 | 356 | 50  | 30  | PP   | fragment | 0.60 | 1.8E-08 | 1.6E-08 |
| KEOST2015-2016 #14 | 357 | 40  | 30  | ABS  | fragment | 0.75 | 1.4E-08 | 1.6E-08 |
| KEOST2015-2016 #14 | 358 | 160 | 90  | EVA  | fragment | 0.56 | 5.1E-07 | 4.7E-07 |
| KEOST2015-2016 #14 | 359 | 50  | 40  | PE   | fragment | 0.80 | 3.1E-08 | 3.0E-08 |
| KEOST2015-2016 #14 | 360 | 400 | 30  | PET  | fiber    | -    | 1.1E-07 | 1.5E-07 |
| KEOST2015-2016 #14 | 361 | 30  | 30  | PP   | fragment | 1.00 | 1.1E-08 | 9.6E-09 |
| KEOST2015-2016 #15 | 362 | 30  | 30  | PA   | fragment | 1.00 | 1.1E-08 | 1.2E-08 |

|                    |     |     |     |      |          |      |         |         |
|--------------------|-----|-----|-----|------|----------|------|---------|---------|
| KEOST2015-2016 #15 | 363 | 30  | 30  | PA   | fragment | 1.00 | 1.1E-08 | 1.2E-08 |
| KEOST2015-2016 #15 | 364 | 50  | 50  | PE   | fragment | 1.00 | 4.9E-08 | 4.6E-08 |
| KEOST2015-2016 #15 | 365 | 50  | 50  | PE   | fragment | 1.00 | 4.9E-08 | 4.6E-08 |
| KEOST2015-2016 #15 | 366 | 40  | 40  | PVC  | fragment | 1.00 | 2.5E-08 | 3.6E-08 |
| KEOST2015-2016 #16 | 367 | 50  | 30  | EVOH | fragment | 0.60 | 1.8E-08 | 2.0E-08 |
| KEOST2015-2016 #16 | 368 | 100 | 40  | PA   | fragment | 0.40 | 6.3E-08 | 7.2E-08 |
| KEOST2015-2016 #16 | 369 | 90  | 40  | PBT  | fragment | 0.44 | 5.7E-08 | 7.6E-08 |
| KEOST2015-2016 #16 | 370 | 240 | 30  | PET  | fiber    | -    | 6.8E-08 | 9.2E-08 |
| KEOST2015-2016 #16 | 371 | 420 | 40  | PET  | fiber    | -    | 2.1E-07 | 2.9E-07 |
| KEOST2015-2016 #16 | 372 | 40  | 30  | PP   | fragment | 0.75 | 1.4E-08 | 1.3E-08 |
| KEOST2015-2016 #16 | 373 | 130 | 40  | PTFE | fragment | 0.31 | 8.2E-08 | 1.8E-07 |
| KEOST2016-2017 #1  | 381 | 50  | 40  | EVA  | fragment | 0.80 | 3.1E-08 | 2.9E-08 |
| KEOST2016-2017 #1  | 382 | 50  | 20  | PBT  | fragment | 0.40 | 7.9E-09 | 1.1E-08 |
| KEOST2016-2017 #1  | 383 | 60  | 50  | PE   | fragment | 0.83 | 5.9E-08 | 5.6E-08 |
| KEOST2016-2017 #1  | 384 | 70  | 50  | PE   | fragment | 0.71 | 6.9E-08 | 6.5E-08 |
| KEOST2016-2017 #1  | 385 | 50  | 40  | PE   | fragment | 0.80 | 3.1E-08 | 3.0E-08 |
| KEOST2016-2017 #1  | 386 | 60  | 50  | PE   | fragment | 0.83 | 5.9E-08 | 5.6E-08 |
| KEOST2016-2017 #1  | 387 | 30  | 30  | PET  | fragment | 1.00 | 1.1E-08 | 1.4E-08 |
| KEOST2016-2017 #1  | 388 | 30  | 30  | PET  | fragment | 1.00 | 1.1E-08 | 1.4E-08 |
| KEOST2016-2017 #1  | 389 | 150 | 20  | PMP  | fiber    | -    | 1.9E-08 | 1.6E-08 |
| KEOST2016-2017 #2  | 390 | 100 | 10  | EP   | fiber    | -    | 3.1E-09 | 4.1E-09 |
| KEOST2016-2017 #2  | 391 | 70  | 60  | EVOH | fragment | 0.86 | 9.9E-08 | 1.1E-07 |
| KEOST2016-2017 #2  | 392 | 200 | 200 | PE   | fragment | 1.00 | 3.1E-06 | 3.0E-06 |
| KEOST2016-2017 #2  | 393 | 120 | 30  | PE   | fiber    | -    | 3.4E-08 | 3.2E-08 |
| KEOST2016-2017 #2  | 394 | 30  | 30  | PP   | fragment | 1.00 | 1.1E-08 | 9.6E-09 |
| KEOST2016-2017 #2  | 395 | 120 | 20  | PVC  | fiber    | -    | 1.5E-08 | 2.1E-08 |
| KEOST2016-2017 #2  | 396 | 90  | 50  | PVC  | fragment | 0.56 | 8.8E-08 | 1.3E-07 |
| KEOST2016-2017 #3  | 397 | 50  | 20  | EP   | fiber    | -    | 6.3E-09 | 8.2E-09 |
| KEOST2016-2017 #3  | 398 | 60  | 50  | EVOH | fragment | 0.83 | 5.9E-08 | 6.8E-08 |
| KEOST2016-2017 #3  | 399 | 50  | 30  | PE   | fragment | 0.60 | 1.8E-08 | 1.7E-08 |
| KEOST2016-2017 #3  | 400 | 50  | 50  | PE   | fragment | 1.00 | 4.9E-08 | 4.6E-08 |
| KEOST2016-2017 #3  | 401 | 40  | 30  | PE   | fragment | 0.75 | 1.4E-08 | 1.3E-08 |
| KEOST2016-2017 #3  | 402 | 60  | 40  | PE   | fragment | 0.67 | 3.8E-08 | 3.6E-08 |
| KEOST2016-2017 #3  | 403 | 70  | 60  | PE   | fragment | 0.86 | 9.9E-08 | 9.3E-08 |
| KEOST2016-2017 #3  | 404 | 60  | 50  | PET  | fragment | 0.83 | 5.9E-08 | 8.0E-08 |
| KEOST2016-2017 #3  | 405 | 40  | 40  | PVC  | fragment | 1.00 | 2.5E-08 | 3.6E-08 |
| KEOST2016-2017 #4  | 406 | 40  | 30  | EVOH | fragment | 0.75 | 1.4E-08 | 1.6E-08 |
| KEOST2016-2017 #4  | 407 | 70  | 50  | EVOH | fragment | 0.71 | 6.9E-08 | 7.9E-08 |
| KEOST2016-2017 #4  | 408 | 50  | 50  | PE   | fragment | 1.00 | 4.9E-08 | 4.6E-08 |
| KEOST2016-2017 #4  | 409 | 30  | 30  | PE   | fragment | 1.00 | 1.1E-08 | 1.0E-08 |
| KEOST2016-2017 #4  | 410 | 30  | 30  | PE   | fragment | 1.00 | 1.1E-08 | 1.0E-08 |
| KEOST2016-2017 #4  | 411 | 40  | 30  | PP   | fragment | 0.75 | 1.4E-08 | 1.3E-08 |
| KEOST2016-2017 #4  | 412 | 80  | 50  | PP   | fragment | 0.63 | 7.9E-08 | 7.1E-08 |
| Blank A            | 413 | 40  | 30  | PET  | fragment | 0.75 | 1.4E-08 | 1.9E-08 |
| Blank A            | 414 | 150 | 40  | PET  | fragment | 0.27 | 9.4E-08 | 1.3E-07 |

Table S9. Microplastic abundance fluxes at Stn. KEO. Polymer-type abbreviations are as shown in Table S1

| Sample No.     | Open date | Close date | Sampling interval (days) | Aliquot size | Fixed volume (mL) | Analyzed sample volume (mL) | Dilution rate | Abundance flux (pieces m <sup>-2</sup> day <sup>-1</sup> ) |     |     |      |     |     |    |    |     |      |     |     |    |     |      |    |     | Total MPs |     |
|----------------|-----------|------------|--------------------------|--------------|-------------------|-----------------------------|---------------|------------------------------------------------------------|-----|-----|------|-----|-----|----|----|-----|------|-----|-----|----|-----|------|----|-----|-----------|-----|
|                |           |            |                          |              |                   |                             |               | ABS                                                        | EP  | EVA | EVOH | PA  | PBT | PC | PE | PET | PMMA | PMP | POM | PP | PS  | PTFE | PU | PVC |           |     |
| KEOST2014-2015 | 1         | 2014/7/1   | 2014/7/19                | 18           | 1/10              | 50                          | 5.0           | 10                                                         | 11  | 0   | 0    | 0   | 22  | 11 | 0  | 56  | 33   | 0   | 0   | 0  | 22  | 0    | 0  | 0   | 0         | 156 |
| KEOST2014-2015 | 2         | 2014/7/19  | 2014/8/6                 | 18           | 1/10              | 50                          | 2.0           | 25                                                         | 0   | 28  | 56   | 56  | 28  | 0  | 0  | 56  | 28   | 0   | 0   | 0  | 28  | 0    | 0  | 0   | 0         | 278 |
| KEOST2014-2015 | 3         | 2014/8/6   | 2014/8/24                | 18           | 1/10              | 50                          | 2.0           | 25                                                         | 0   | 0   | 28   | 0   | 0   | 0  | 0  | 139 | 56   | 0   | 0   | 0  | 28  | 0    | 0  | 0   | 0         | 250 |
| KEOST2014-2015 | 4         | 2014/8/24  | 2014/9/11                | 18           | 1/10              | 50                          | 2.0           | 25                                                         | 0   | 0   | 111  | 0   | 28  | 0  | 0  | 306 | 0    | 0   | 0   | 0  | 28  | 28   | 0  | 0   | 0         | 500 |
| KEOST2014-2015 | 5         | 2014/9/11  | 2014/9/29                | 18           | 1/10              | 50                          | 2.0           | 25                                                         | 0   | 28  | 0    | 56  | 28  | 0  | 0  | 194 | 0    | 0   | 0   | 0  | 28  | 0    | 0  | 0   | 0         | 333 |
| KEOST2014-2015 | 6         | 2014/9/29  | 2014/10/17               | 18           | 1/10              | 50                          | 2.0           | 25                                                         | 0   | 0   | 56   | 56  | 83  | 0  | 0  | 222 | 0    | 0   | 0   | 0  | 0   | 0    | 0  | 0   | 28        | 444 |
| KEOST2014-2015 | 7         | 2014/10/17 | 2014/11/4                | 18           | 1/10              | 50                          | 2.0           | 25                                                         | 0   | 0   | 83   | 111 | 0   | 0  | 0  | 83  | 0    | 0   | 0   | 0  | 28  | 0    | 0  | 0   | 0         | 306 |
| KEOST2014-2015 | 8         | 2014/11/4  | 2014/11/22               | 18           | 1/10              | 50                          | 2.0           | 25                                                         | 0   | 0   | 0    | 139 | 56  | 0  | 0  | 83  | 0    | 0   | 0   | 0  | 28  | 0    | 0  | 28  | 0         | 333 |
| KEOST2014-2015 | 9         | 2014/11/22 | 2014/12/10               | 18           | 1/10              | 50                          | 2.0           | 25                                                         | 0   | 0   | 28   | 0   | 0   | 0  | 0  | 278 | 0    | 0   | 0   | 0  | 28  | 0    | 0  | 0   | 28        | 361 |
| KEOST2014-2015 | 10        | 2014/12/10 | 2014/12/28               | 18           | 1/10              | 50                          | 2.0           | 25                                                         | 0   | 0   | 28   | 83  | 56  | 0  | 28 | 111 | 28   | 0   | 0   | 0  | 28  | 0    | 0  | 28  | 0         | 389 |
| KEOST2014-2015 | 11        | 2014/12/28 | 2015/1/15                | 18           | 1/10              | 50                          | 2.0           | 25                                                         | 0   | 0   | 28   | 28  | 28  | 0  | 0  | 56  | 0    | 28  | 28  | 0  | 0   | 0    | 0  | 0   | 56        | 250 |
| KEOST2014-2015 | 12        | 2015/1/15  | 2015/2/2                 | 18           | 1/10              | 50                          | 2.0           | 25                                                         | 28  | 28  | 28   | 56  | 0   | 0  | 0  | 28  | 0    | 0   | 0   | 0  | 0   | 0    | 0  | 28  | 0         | 194 |
| KEOST2014-2015 | 13        | 2015/2/2   | 2015/2/20                | 18           | 1/10              | 50                          | 2.0           | 25                                                         | 0   | 0   | 28   | 0   | 28  | 0  | 0  | 56  | 0    | 0   | 0   | 0  | 111 | 0    | 0  | 0   | 28        | 250 |
| KEOST2014-2015 | 14        | 2015/2/20  | 2015/3/10                | 18           | 1/10              | 50                          | 2.0           | 25                                                         | 0   | 0   | 56   | 28  | 56  | 0  | 0  | 56  | 28   | 0   | 0   | 28 | 56  | 0    | 0  | 28  | 0         | 333 |
| KEOST2014-2015 | 15        | 2015/3/10  | 2015/3/28                | 18           | 1/10              | 50                          | 2.0           | 25                                                         | 0   | 56  | 28   | 28  | 0   | 0  | 0  | 56  | 28   | 0   | 0   | 0  | 28  | 0    | 0  | 0   | 0         | 222 |
| KEOST2014-2015 | 16        | 2015/3/28  | 2015/4/15                | 18           | 1/10              | 50                          | 2.0           | 25                                                         | 0   | 0   | 0    | 0   | 28  | 0  | 0  | 28  | 0    | 0   | 0   | 28 | 28  | 0    | 0  | 28  | 0         | 139 |
| KEOST2014-2015 | 17        | 2015/4/15  | 2015/5/3                 | 18           | 1/10              | 50                          | 0.5           | 100                                                        | 0   | 0   | 111  | 111 | 0   | 0  | 0  | 333 | 0    | 0   | 0   | 0  | 0   | 0    | 0  | 0   | 111       | 667 |
| KEOST2014-2015 | 18        | 2015/5/3   | 2015/5/21                | 18           | 1/10              | 50                          | 0.5           | 100                                                        | 0   | 0   | 0    | 222 | 111 | 0  | 0  | 333 | 0    | 0   | 0   | 0  | 0   | 0    | 0  | 0   | 0         | 667 |
| KEOST2014-2015 | 19        | 2015/5/21  | 2015/6/8                 | 18           | 1/10              | 50                          | 0.5           | 100                                                        | 0   | 111 | 111  | 111 | 111 | 0  | 0  | 333 | 0    | 0   | 111 | 0  | 0   | 0    | 0  | 0   | 0         | 889 |
| KEOST2014-2015 | 20        | 2015/6/8   | 2015/6/26                | 18           | 1/10              | 50                          | 0.5           | 100                                                        | 0   | 111 | 111  | 0   | 0   | 0  | 0  | 222 | 0    | 0   | 0   | 0  | 111 | 111  | 0  | 222 | 0         | 889 |
| KEOST2014-2015 | 21        | 2015/6/26  | 2015/7/14                | 18           | 1/10              | 50                          | 1.0           | 50                                                         | 56  | 56  | 0    | 111 | 111 | 0  | 56 | 56  | 0    | 0   | 56  | 0  | 0   | 0    | 0  | 0   | 56        | 556 |
| KEOST2015-2016 | 1         | 2015/9/10  | 2015/9/28                | 18           | 1/10              | 50                          | 2.0           | 25                                                         | 28  | 0   | 56   | 0   | 0   | 28 | 0  | 56  | 28   | 0   | 0   | 0  | 0   | 0    | 0  | 0   | 28        | 222 |
| KEOST2015-2016 | 2         | 2015/9/28  | 2015/10/16               | 18           | 1/10              | 50                          | 2.0           | 25                                                         | 0   | 28  | 111  | 28  | 0   | 0  | 0  | 83  | 28   | 0   | 0   | 0  | 0   | 0    | 0  | 0   | 28        | 306 |
| KEOST2015-2016 | 3         | 2015/10/16 | 2015/11/3                | 18           | 1/10              | 50                          | 2.0           | 25                                                         | 0   | 0   | 0    | 56  | 28  | 28 | 0  | 0   | 56   | 0   | 0   | 0  | 0   | 0    | 0  | 0   | 0         | 167 |
| KEOST2015-2016 | 4         | 2015/11/3  | 2015/11/21               | 18           | 1/10              | 50                          | 2.0           | 25                                                         | 0   | 0   | 0    | 0   | 83  | 0  | 0  | 56  | 0    | 0   | 0   | 0  | 83  | 0    | 0  | 0   | 0         | 222 |
| KEOST2015-2016 | 5         | 2015/11/21 | 2015/12/9                | 18           | 1/10              | 50                          | 2.0           | 25                                                         | 0   | 0   | 28   | 56  | 0   | 0  | 0  | 139 | 0    | 0   | 0   | 0  | 56  | 0    | 0  | 0   | 0         | 278 |
| KEOST2015-2016 | 6         | 2015/12/9  | 2015/12/27               | 18           | 1/10              | 50                          | 1.0           | 50                                                         | 0   | 56  | 0    | 0   | 56  | 0  | 0  | 167 | 0    | 0   | 0   | 0  | 0   | 0    | 0  | 0   | 56        | 333 |
| KEOST2015-2016 | 7         | 2015/12/27 | 2016/1/14                | 18           | 1/10              | 50                          | 2.0           | 25                                                         | 0   | 28  | 0    | 83  | 56  | 0  | 0  | 56  | 28   | 0   | 0   | 0  | 28  | 0    | 0  | 0   | 0         | 278 |
| KEOST2015-2016 | 8         | 2016/1/14  | 2016/2/1                 | 18           | 1/10              | 50                          | 2.0           | 25                                                         | 0   | 0   | 28   | 0   | 28  | 0  | 0  | 28  | 0    | 0   | 0   | 0  | 28  | 0    | 0  | 0   | 0         | 111 |
| KEOST2015-2016 | 9         | 2016/2/1   | 2016/2/19                | 18           | 1/10              | 50                          | 2.0           | 25                                                         | 0   | 0   | 0    | 56  | 56  | 28 | 0  | 139 | 0    | 0   | 0   | 0  | 28  | 0    | 0  | 0   | 0         | 306 |
| KEOST2015-2016 | 10        | 2016/2/19  | 2016/3/8                 | 18           | 1/10              | 50                          | 2.0           | 25                                                         | 0   | 0   | 0    | 28  | 28  | 0  | 0  | 111 | 56   | 0   | 0   | 0  | 0   | 0    | 0  | 0   | 0         | 222 |
| KEOST2015-2016 | 11        | 2016/3/8   | 2016/3/26                | 18           | 1/10              | 50                          | 2.0           | 25                                                         | 0   | 0   | 0    | 0   | 139 | 0  | 0  | 111 | 28   | 0   | 0   | 0  | 28  | 0    | 0  | 0   | 0         | 306 |
| KEOST2015-2016 | 12        | 2016/3/26  | 2016/4/13                | 18           | 1/10              | 50                          | 0.5           | 100                                                        | 111 | 0   | 111  | 0   | 0   | 0  | 0  | 333 | 111  | 0   | 0   | 0  | 0   | 0    | 0  | 0   | 0         | 667 |
| KEOST2015-2016 | 13        | 2016/4/13  | 2016/5/1                 | 18           | 1/10              | 50                          | 1.0           | 50                                                         | 0   | 0   | 56   | 0   | 56  | 0  | 0  | 56  | 56   | 0   | 0   | 0  | 56  | 0    | 0  | 0   | 0         | 278 |
| KEOST2015-2016 | 14        | 2016/5/1   | 2016/5/19                | 18           | 1/10              | 50                          | 2.0           | 25                                                         | 28  | 0   | 28   | 0   | 0   | 0  | 0  | 28  | 0    | 0   | 0   | 0  | 28  | 0    | 0  | 0   | 0         | 111 |
| KEOST2015-2016 | 15        | 2016/5/19  | 2016/6/6                 | 18           | 1/10              | 50                          | 1.0           | 50                                                         | 0   | 0   | 0    | 0   | 111 | 0  | 0  | 111 | 0    | 0   | 0   | 0  | 0   | 0    | 0  | 0   | 56        | 278 |
| KEOST2015-2016 | 16        | 2016/6/6   | 2016/6/24                | 18           | 1/10              | 50                          | 1.0           | 50                                                         | 0   | 0   | 0    | 56  | 56  | 56 | 0  | 0   | 0    | 0   | 0   | 0  | 56  | 0    | 56 | 0   | 0         | 278 |
| KEOST2016-2017 | 1         | 2016/7/10  | 2016/7/31                | 21           | 1/10              | 50                          | 0.5           | 100                                                        | 0   | 0   | 95   | 0   | 0   | 95 | 0  | 381 | 190  | 0   | 0   | 0  | 0   | 0    | 0  | 0   | 0         | 762 |
| KEOST2016-2017 | 2         | 2016/7/31  | 2016/8/21                | 21           | 1/10              | 50                          | 1.0           | 50                                                         | 0   | 0   | 0    | 48  | 0   | 0  | 0  | 48  | 0    | 0   | 0   | 0  | 48  | 0    | 0  | 0   | 48        | 190 |
| KEOST2016-2017 | 3         | 2016/8/21  | 2016/9/11                | 21           | 1/10              | 50                          | 1.0           | 50                                                         | 0   | 0   | 0    | 48  | 0   | 0  | 0  | 238 | 48   | 0   | 0   | 0  | 0   | 0    | 0  | 0   | 48        | 381 |
| KEOST2016-2017 | 4         | 2016/9/11  | 2016/10/2                | 21           | 1/10              | 50                          | 1.0           | 50                                                         | 0   | 0   | 0    | 95  | 0   | 0  | 0  | 143 | 0    | 0   | 0   | 0  | 95  | 0    | 0  | 0   | 0         | 333 |

Table S10. Mean polymer-type composition by abundance, mass, and carbon fluxes of microplastics at Stn. KEO. Polymer-type abbreviations are as shown in Table S1

| Abundance flux |      | Mass flux    |      | Carbon flux  |      |
|----------------|------|--------------|------|--------------|------|
| Polymer-type   | %    | Polymer-type | %    | Polymer-type | %    |
| PE             | 37.4 | EVA          | 35.3 | EVA          | 34.2 |
| EVOH           | 12.1 | PE           | 18.7 | PE           | 24.6 |
| PA             | 10.0 | PA           | 12.6 | PA           | 12.3 |
| EVA            | 9.6  | PVC          | 11.6 | PVC          | 6.9  |
| PP             | 7.7  | EP           | 6.8  | EP           | 6.7  |
| PET            | 5.9  | PET          | 6.3  | PET          | 6.0  |
| PVC            | 4.0  | EVOH         | 4.0  | EVOH         | 4.1  |
| EP             | 3.6  | PP           | 1.4  | PP           | 1.9  |
| PU             | 2.5  | PC           | 0.7  | PC           | 0.7  |
| ABS            | 1.8  | PU           | 0.5  | PMMA         | 0.6  |
| PBT            | 1.8  | PMMA         | 0.5  | ABS          | 0.6  |
| PMP            | 1.3  | ABS          | 0.4  | PBT          | 0.4  |
| PS             | 0.9  | PBT          | 0.4  | PU           | 0.3  |
| PC             | 0.6  | PTFE         | 0.4  | PS           | 0.2  |
| POM            | 0.4  | PS           | 0.2  | PTFE         | 0.2  |
| PTFE           | 0.4  | PMP          | 0.1  | PMP          | 0.1  |
| PMMA           | 0.2  | POM          | 0.05 | POM          | 0.03 |

Table S11. Mean size composition by abundance and mass fluxes of microplastics at Stn. KEO during the sampling period

| Size range | Abundance flux (%) | Mass flux (%) |
|------------|--------------------|---------------|
| 20-50      | 61.7               | 8.6           |
| 50-100     | 28.4               | 15.5          |
| 100-150    | 4.6                | 15.9          |
| 150-200    | 3.8                | 21.1          |
| 200-300    | 0.9                | 16.9          |
| >300       | 0.6                | 22.1          |

Table S12. Microplastic mass fluxes at Stn. KEO. Polymer-type abbreviations are as shown in Table S1

| Sample No.     | Open date | Close date | Mass flux (mg m <sup>-2</sup> day <sup>-1</sup> ) |         |         |         |         |         |         |         |         |         |         |         |         |         |         |         |         | Total   |         |
|----------------|-----------|------------|---------------------------------------------------|---------|---------|---------|---------|---------|---------|---------|---------|---------|---------|---------|---------|---------|---------|---------|---------|---------|---------|
|                |           |            | ABS                                               | EP      | EVA     | EVOH    | PA      | PBT     | PC      | PE      | PET     | PMMA    | PMP     | POM     | PP      | PS      | PTFE    | PU      | PVC     |         |         |
| KEOST2014-2015 | 1         | 2014/7/1   | 2014/7/19                                         | 1.3E-04 | 0.0E+00 | 0.0E+00 | 0.0E+00 | 3.6E-04 | 1.0E-03 | 0.0E+00 | 4.2E-03 | 4.2E-03 | 0.0E+00 | 0.0E+00 | 0.0E+00 | 2.8E-04 | 0.0E+00 | 0.0E+00 | 5.9E-15 | 0.0E+00 | 1.0E-02 |
| KEOST2014-2015 | 2         | 2014/7/19  | 2014/8/6                                          | 0.0E+00 | 2.8E-03 | 3.5E-02 | 5.0E-03 | 3.4E-04 | 0.0E+00 | 0.0E+00 | 2.8E-03 | 1.8E-03 | 0.0E+00 | 0.0E+00 | 0.0E+00 | 1.2E-04 | 0.0E+00 | 0.0E+00 | 0.0E+00 | 0.0E+00 | 4.8E-02 |
| KEOST2014-2015 | 3         | 2014/8/6   | 2014/8/24                                         | 0.0E+00 | 0.0E+00 | 2.2E-03 | 0.0E+00 | 0.0E+00 | 0.0E+00 | 0.0E+00 | 3.6E-03 | 4.7E-03 | 0.0E+00 | 0.0E+00 | 0.0E+00 | 2.2E-03 | 0.0E+00 | 0.0E+00 | 0.0E+00 | 0.0E+00 | 1.3E-02 |
| KEOST2014-2015 | 4         | 2014/8/24  | 2014/9/11                                         | 0.0E+00 | 0.0E+00 | 5.5E-02 | 0.0E+00 | 1.9E-03 | 0.0E+00 | 0.0E+00 | 1.6E-02 | 1.0E-14 | 0.0E+00 | 0.0E+00 | 0.0E+00 | 7.9E-04 | 1.8E-04 | 0.0E+00 | 0.0E+00 | 0.0E+00 | 7.4E-02 |
| KEOST2014-2015 | 5         | 2014/9/11  | 2014/9/29                                         | 0.0E+00 | 3.8E-04 | 0.0E+00 | 2.8E-03 | 1.5E-04 | 0.0E+00 | 0.0E+00 | 1.2E-02 | 0.0E+00 | 0.0E+00 | 0.0E+00 | 0.0E+00 | 3.6E-04 | 0.0E+00 | 0.0E+00 | 0.0E+00 | 0.0E+00 | 1.6E-02 |
| KEOST2014-2015 | 6         | 2014/9/29  | 2014/10/17                                        | 0.0E+00 | 0.0E+00 | 5.3E-04 | 3.1E-03 | 3.8E-02 | 0.0E+00 | 0.0E+00 | 2.2E-03 | 2.2E-15 | 0.0E+00 | 0.0E+00 | 0.0E+00 | 7.7E-15 | 0.0E+00 | 0.0E+00 | 0.0E+00 | 5.6E-03 | 4.9E-02 |
| KEOST2014-2015 | 7         | 2014/10/17 | 2014/11/4                                         | 0.0E+00 | 0.0E+00 | 8.1E-04 | 5.8E-03 | 0.0E+00 | 0.0E+00 | 0.0E+00 | 2.1E-02 | 0.0E+00 | 0.0E+00 | 0.0E+00 | 0.0E+00 | 5.3E-04 | 0.0E+00 | 0.0E+00 | 0.0E+00 | 0.0E+00 | 2.8E-02 |
| KEOST2014-2015 | 8         | 2014/11/4  | 2014/11/22                                        | 0.0E+00 | 0.0E+00 | 0.0E+00 | 5.2E-03 | 7.1E-04 | 0.0E+00 | 0.0E+00 | 2.2E-03 | 0.0E+00 | 0.0E+00 | 0.0E+00 | 0.0E+00 | 1.2E-04 | 0.0E+00 | 0.0E+00 | 2.8E-03 | 0.0E+00 | 1.1E-02 |
| KEOST2014-2015 | 9         | 2014/11/22 | 2014/12/10                                        | 0.0E+00 | 0.0E+00 | 1.6E-04 | 0.0E+00 | 0.0E+00 | 0.0E+00 | 0.0E+00 | 9.6E-03 | 0.0E+00 | 0.0E+00 | 0.0E+00 | 0.0E+00 | 3.6E-04 | 0.0E+00 | 0.0E+00 | 0.0E+00 | 9.9E-04 | 1.1E-02 |
| KEOST2014-2015 | 10        | 2014/12/10 | 2014/12/28                                        | 0.0E+00 | 0.0E+00 | 9.7E-04 | 4.8E-03 | 7.1E-04 | 0.0E+00 | 2.9E-03 | 2.9E-03 | 3.3E-03 | 0.0E+00 | 0.0E+00 | 0.0E+00 | 7.9E-04 | 0.0E+00 | 0.0E+00 | 3.5E-04 | 0.0E+00 | 1.7E-02 |
| KEOST2014-2015 | 11        | 2014/12/28 | 2015/1/15                                         | 0.0E+00 | 0.0E+00 | 8.1E-04 | 2.2E-03 | 9.9E-04 | 0.0E+00 | 0.0E+00 | 5.6E-04 | 0.0E+00 | 1.1E-02 | 5.8E-04 | 0.0E+00 | 0.0E+00 | 0.0E+00 | 0.0E+00 | 0.0E+00 | 1.4E-02 | 2.9E-02 |
| KEOST2014-2015 | 12        | 2015/1/15  | 2015/2/2                                          | 3.3E-04 | 9.7E-02 | 2.7E-01 | 3.0E-03 | 0.0E+00 | 0.0E+00 | 0.0E+00 | 4.1E-03 | 8.1E-15 | 0.0E+00 | 0.0E+00 | 0.0E+00 | 0.0E+00 | 0.0E+00 | 0.0E+00 | 4.6E-04 | 0.0E+00 | 3.8E-01 |
| KEOST2014-2015 | 13        | 2015/2/2   | 2015/2/20                                         | 0.0E+00 | 0.0E+00 | 2.6E-01 | 0.0E+00 | 5.6E-04 | 0.0E+00 | 0.0E+00 | 5.1E-03 | 0.0E+00 | 0.0E+00 | 0.0E+00 | 0.0E+00 | 2.2E-03 | 0.0E+00 | 0.0E+00 | 0.0E+00 | 2.7E-03 | 2.7E-01 |
| KEOST2014-2015 | 14        | 2015/2/20  | 2015/3/10                                         | 0.0E+00 | 1.2E-15 | 2.5E-03 | 1.6E-03 | 6.6E-04 | 0.0E+00 | 0.0E+00 | 3.6E-03 | 3.3E-03 | 0.0E+00 | 0.0E+00 | 5.6E-04 | 5.3E-03 | 0.0E+00 | 0.0E+00 | 2.2E-03 | 0.0E+00 | 2.0E-02 |
| KEOST2014-2015 | 15        | 2015/3/10  | 2015/3/28                                         | 0.0E+00 | 4.4E-03 | 2.2E-03 | 1.6E-03 | 0.0E+00 | 0.0E+00 | 0.0E+00 | 7.4E-04 | 2.4E-04 | 0.0E+00 | 0.0E+00 | 0.0E+00 | 6.3E-04 | 0.0E+00 | 0.0E+00 | 0.0E+00 | 0.0E+00 | 9.8E-03 |
| KEOST2014-2015 | 16        | 2015/3/28  | 2015/4/15                                         | 0.0E+00 | 5.2E-15 | 0.0E+00 | 0.0E+00 | 1.9E-01 | 0.0E+00 | 0.0E+00 | 4.6E-04 | 0.0E+00 | 0.0E+00 | 0.0E+00 | 4.9E-04 | 6.2E-04 | 0.0E+00 | 0.0E+00 | 1.2E-03 | 0.0E+00 | 2.0E-01 |
| KEOST2014-2015 | 17        | 2015/4/15  | 2015/5/3                                          | 0.0E+00 | 0.0E+00 | 1.5E-03 | 6.3E-03 | 0.0E+00 | 0.0E+00 | 0.0E+00 | 3.6E-03 | 1.1E-13 | 0.0E+00 | 0.0E+00 | 0.0E+00 | 0.0E+00 | 0.0E+00 | 0.0E+00 | 0.0E+00 | 1.6E-01 | 1.7E-01 |
| KEOST2014-2015 | 18        | 2015/5/3   | 2015/5/21                                         | 0.0E+00 | 0.0E+00 | 0.0E+00 | 1.0E-02 | 4.0E-03 | 0.0E+00 | 0.0E+00 | 4.9E-03 | 0.0E+00 | 0.0E+00 | 0.0E+00 | 0.0E+00 | 0.0E+00 | 0.0E+00 | 0.0E+00 | 0.0E+00 | 0.0E+00 | 1.9E-02 |
| KEOST2014-2015 | 19        | 2015/5/21  | 2015/6/8                                          | 0.0E+00 | 6.8E-04 | 6.6E-02 | 4.8E-03 | 1.3E-03 | 0.0E+00 | 0.0E+00 | 4.6E-03 | 0.0E+00 | 0.0E+00 | 9.9E-04 | 0.0E+00 | 0.0E+00 | 0.0E+00 | 0.0E+00 | 0.0E+00 | 0.0E+00 | 7.8E-02 |
| KEOST2014-2015 | 20        | 2015/6/8   | 2015/6/26                                         | 0.0E+00 | 1.2E-02 | 5.1E-03 | 0.0E+00 | 0.0E+00 | 0.0E+00 | 0.0E+00 | 3.8E-03 | 0.0E+00 | 0.0E+00 | 0.0E+00 | 0.0E+00 | 1.4E-03 | 3.6E-03 | 0.0E+00 | 5.1E-03 | 0.0E+00 | 3.1E-02 |
| KEOST2014-2015 | 21        | 2015/6/26  | 2015/7/14                                         | 1.9E-03 | 1.0E-03 | 0.0E+00 | 4.4E-03 | 8.3E-03 | 0.0E+00 | 1.3E-02 | 4.4E-03 | 0.0E+00 | 0.0E+00 | 8.2E-04 | 0.0E+00 | 0.0E+00 | 0.0E+00 | 0.0E+00 | 0.0E+00 | 3.9E-03 | 3.8E-02 |
| KEOST2015-2016 | 1         | 2015/9/10  | 2015/9/28                                         | 9.7E-04 | 0.0E+00 | 3.9E-03 | 0.0E+00 | 0.0E+00 | 4.0E-04 | 0.0E+00 | 1.3E-02 | 1.1E-03 | 0.0E+00 | 0.0E+00 | 0.0E+00 | 1.1E-15 | 0.0E+00 | 1.4E-15 | 0.0E+00 | 9.9E-04 | 2.0E-02 |
| KEOST2015-2016 | 2         | 2015/9/28  | 2015/10/16                                        | 0.0E+00 | 1.1E-03 | 4.5E-02 | 1.0E-03 | 0.0E+00 | 0.0E+00 | 0.0E+00 | 2.9E-03 | 5.3E-04 | 0.0E+00 | 0.0E+00 | 0.0E+00 | 0.0E+00 | 0.0E+00 | 0.0E+00 | 0.0E+00 | 3.8E-02 | 8.9E-02 |
| KEOST2015-2016 | 3         | 2015/10/16 | 2015/11/3                                         | 0.0E+00 | 0.0E+00 | 0.0E+00 | 1.0E-03 | 1.2E-03 | 1.2E-03 | 0.0E+00 | 0.0E+00 | 3.9E-02 | 0.0E+00 | 0.0E+00 | 0.0E+00 | 0.0E+00 | 0.0E+00 | 0.0E+00 | 0.0E+00 | 0.0E+00 | 4.3E-02 |
| KEOST2015-2016 | 4         | 2015/11/3  | 2015/11/21                                        | 0.0E+00 | 0.0E+00 | 0.0E+00 | 0.0E+00 | 2.8E-03 | 0.0E+00 | 0.0E+00 | 2.9E-02 | 0.0E+00 | 0.0E+00 | 0.0E+00 | 0.0E+00 | 3.3E-03 | 0.0E+00 | 0.0E+00 | 0.0E+00 | 0.0E+00 | 3.5E-02 |
| KEOST2015-2016 | 5         | 2015/11/21 | 2015/12/9                                         | 0.0E+00 | 0.0E+00 | 2.0E-03 | 2.9E-03 | 0.0E+00 | 0.0E+00 | 0.0E+00 | 9.8E-03 | 0.0E+00 | 0.0E+00 | 0.0E+00 | 0.0E+00 | 1.7E-03 | 0.0E+00 | 0.0E+00 | 0.0E+00 | 0.0E+00 | 1.6E-02 |
| KEOST2015-2016 | 6         | 2015/12/9  | 2015/12/27                                        | 0.0E+00 | 1.8E-02 | 0.0E+00 | 0.0E+00 | 6.7E-04 | 0.0E+00 | 0.0E+00 | 9.4E-03 | 0.0E+00 | 0.0E+00 | 0.0E+00 | 0.0E+00 | 0.0E+00 | 0.0E+00 | 0.0E+00 | 0.0E+00 | 2.6E-02 | 5.4E-02 |
| KEOST2015-2016 | 7         | 2015/12/27 | 2016/1/14                                         | 0.0E+00 | 1.4E-02 | 0.0E+00 | 4.5E-03 | 2.6E-03 | 0.0E+00 | 0.0E+00 | 4.3E-03 | 2.1E-02 | 0.0E+00 | 0.0E+00 | 0.0E+00 | 9.8E-04 | 0.0E+00 | 0.0E+00 | 0.0E+00 | 3.0E-15 | 4.7E-02 |
| KEOST2015-2016 | 8         | 2016/1/14  | 2016/2/1                                          | 0.0E+00 | 0.0E+00 | 1.3E-03 | 0.0E+00 | 1.9E-03 | 0.0E+00 | 0.0E+00 | 9.9E-04 | 5.4E-15 | 0.0E+00 | 0.0E+00 | 0.0E+00 | 3.6E-04 | 0.0E+00 | 0.0E+00 | 0.0E+00 | 0.0E+00 | 4.5E-03 |
| KEOST2015-2016 | 9         | 2016/2/1   | 2016/2/19                                         | 0.0E+00 | 0.0E+00 | 0.0E+00 | 1.8E-03 | 1.2E-03 | 1.8E-03 | 0.0E+00 | 4.3E-03 | 4.7E-15 | 0.0E+00 | 0.0E+00 | 0.0E+00 | 7.9E-04 | 0.0E+00 | 0.0E+00 | 0.0E+00 | 0.0E+00 | 9.9E-03 |
| KEOST2015-2016 | 10        | 2016/2/19  | 2016/3/8                                          | 0.0E+00 | 0.0E+00 | 0.0E+00 | 6.8E-04 | 9.9E-04 | 0.0E+00 | 0.0E+00 | 5.9E-03 | 9.3E-04 | 0.0E+00 | 0.0E+00 | 0.0E+00 | 0.0E+00 | 0.0E+00 | 0.0E+00 | 1.3E-15 | 0.0E+00 | 8.5E-03 |
| KEOST2015-2016 | 11        | 2016/3/8   | 2016/3/26                                         | 0.0E+00 | 0.0E+00 | 0.0E+00 | 0.0E+00 | 3.8E-03 | 0.0E+00 | 0.0E+00 | 3.2E-03 | 3.5E-02 | 0.0E+00 | 0.0E+00 | 0.0E+00 | 1.7E-03 | 0.0E+00 | 0.0E+00 | 0.0E+00 | 0.0E+00 | 4.4E-02 |
| KEOST2015-2016 | 12        | 2016/3/26  | 2016/4/13                                         | 6.1E-03 | 0.0E+00 | 7.1E-03 | 0.0E+00 | 0.0E+00 | 0.0E+00 | 0.0E+00 | 1.2E-02 | 8.8E-03 | 0.0E+00 | 0.0E+00 | 0.0E+00 | 0.0E+00 | 0.0E+00 | 0.0E+00 | 0.0E+00 | 0.0E+00 | 3.4E-02 |
| KEOST2015-2016 | 13        | 2016/4/13  | 2016/5/1                                          | 0.0E+00 | 0.0E+00 | 1.1E-02 | 0.0E+00 | 1.1E-02 | 0.0E+00 | 0.0E+00 | 1.6E-03 | 9.0E-03 | 0.0E+00 | 0.0E+00 | 0.0E+00 | 8.9E-04 | 0.0E+00 | 0.0E+00 | 0.0E+00 | 0.0E+00 | 3.3E-02 |
| KEOST2015-2016 | 14        | 2016/5/1   | 2016/5/19                                         | 4.4E-04 | 0.0E+00 | 1.3E-02 | 0.0E+00 | 0.0E+00 | 0.0E+00 | 0.0E+00 | 8.2E-04 | 4.2E-15 | 0.0E+00 | 0.0E+00 | 0.0E+00 | 2.7E-04 | 0.0E+00 | 0.0E+00 | 0.0E+00 | 0.0E+00 | 1.5E-02 |
| KEOST2015-2016 | 15        | 2016/5/19  | 2016/6/6                                          | 0.0E+00 | 0.0E+00 | 0.0E+00 | 0.0E+00 | 1.3E-03 | 0.0E+00 | 0.0E+00 | 5.1E-03 | 0.0E+00 | 0.0E+00 | 0.0E+00 | 0.0E+00 | 0.0E+00 | 0.0E+00 | 0.0E+00 | 0.0E+00 | 2.0E-03 | 8.5E-03 |
| KEOST2015-2016 | 16        | 2016/6/6   | 2016/6/24                                         | 0.0E+00 | 0.0E+00 | 0.0E+00 | 1.1E-03 | 4.0E-03 | 4.2E-03 | 0.0E+00 | 0.0E+00 | 2.1E-14 | 0.0E+00 | 0.0E+00 | 0.0E+00 | 7.1E-04 | 0.0E+00 | 9.8E-03 | 0.0E+00 | 0.0E+00 | 2.0E-02 |
| KEOST2016-2017 | 1         | 2016/7/10  | 2016/7/31                                         | 0.0E+00 | 0.0E+00 | 2.8E-03 | 0.0E+00 | 0.0E+00 | 1.0E-03 | 0.0E+00 | 2.0E-02 | 2.7E-03 | 0.0E+00 | 1.5E-15 | 0.0E+00 | 0.0E+00 | 0.0E+00 | 0.0E+00 | 0.0E+00 | 0.0E+00 | 2.6E-02 |
| KEOST2016-2017 | 2         | 2016/7/31  | 2016/8/21                                         | 0.0E+00 | 1.9E-16 | 0.0E+00 | 5.4E-03 | 0.0E+00 | 0.0E+00 | 0.0E+00 | 1.4E-01 | 0.0E+00 | 0.0E+00 | 0.0E+00 | 0.0E+00 | 4.6E-04 | 0.0E+00 | 0.0E+00 | 0.0E+00 | 6.0E-03 | 1.5E-01 |
| KEOST2016-2017 | 3         | 2016/8/21  | 2016/9/11                                         | 0.0E+00 | 3.9E-16 | 0.0E+00 | 3.2E-03 | 0.0E+00 | 0.0E+00 | 0.0E+00 | 9.8E-03 | 3.8E-03 | 0.0E+00 | 0.0E+00 | 0.0E+00 | 0.0E+00 | 0.0E+00 | 0.0E+00 | 0.0E+00 | 1.7E-03 | 1.8E-02 |
| KEOST2016-2017 | 4         | 2016/9/11  | 2016/10/2                                         | 0.0E+00 | 0.0E+00 | 0.0E+00 | 4.5E-03 | 0.0E+00 | 0.0E+00 | 0.0E+00 | 3.2E-03 | 0.0E+00 | 0.0E+00 | 0.0E+00 | 0.0E+00 | 4.0E-03 | 0.0E+00 | 0.0E+00 | 0.0E+00 | 0.0E+00 | 1.2E-02 |

Table S13. Microplastic carbon fluxes at Stn. KEO. Polymer-type abbreviations are as shown in Table S1

| Sample No.     | Open date | Close date | Carbon flux (mg m <sup>-2</sup> day <sup>-1</sup> ) |         |         |         |         |         |         |         |         |         |         |         |         |         |         |         |         |         |         |
|----------------|-----------|------------|-----------------------------------------------------|---------|---------|---------|---------|---------|---------|---------|---------|---------|---------|---------|---------|---------|---------|---------|---------|---------|---------|
|                |           |            | ABS                                                 | EP      | EVA     | EVOH    | PA      | PBT     | PC      | PE      | PET     | PMMA    | PMP     | POM     | PP      | PS      | PTFE    | PU      | PVC     | Total   |         |
| KEOST2014-2015 | 1         | 2014/7/1   | 2014/7/19                                           | 1.1E-04 | 0.0E+00 | 0.0E+00 | 0.0E+00 | 2.3E-04 | 6.7E-04 | 0.0E+00 | 3.6E-03 | 2.7E-03 | 0.0E+00 | 0.0E+00 | 0.0E+00 | 2.4E-04 | 0.0E+00 | 0.0E+00 | 2.4E-15 | 0.0E+00 | 7.5E-03 |
| KEOST2014-2015 | 2         | 2014/7/19  | 2014/8/6                                            | 0.0E+00 | 1.8E-03 | 2.2E-02 | 3.4E-03 | 2.1E-04 | 0.0E+00 | 0.0E+00 | 2.4E-03 | 1.2E-03 | 0.0E+00 | 0.0E+00 | 0.0E+00 | 1.0E-04 | 0.0E+00 | 0.0E+00 | 0.0E+00 | 0.0E+00 | 3.1E-02 |
| KEOST2014-2015 | 3         | 2014/8/6   | 2014/8/24                                           | 0.0E+00 | 0.0E+00 | 1.4E-03 | 0.0E+00 | 0.0E+00 | 0.0E+00 | 0.0E+00 | 3.1E-03 | 2.9E-03 | 0.0E+00 | 0.0E+00 | 0.0E+00 | 1.9E-03 | 0.0E+00 | 0.0E+00 | 0.0E+00 | 0.0E+00 | 9.3E-03 |
| KEOST2014-2015 | 4         | 2014/8/24  | 2014/9/11                                           | 0.0E+00 | 0.0E+00 | 3.5E-02 | 0.0E+00 | 1.2E-03 | 0.0E+00 | 0.0E+00 | 1.4E-02 | 6.2E-15 | 0.0E+00 | 0.0E+00 | 0.0E+00 | 6.8E-04 | 1.7E-04 | 0.0E+00 | 0.0E+00 | 0.0E+00 | 5.1E-02 |
| KEOST2014-2015 | 5         | 2014/9/11  | 2014/9/29                                           | 0.0E+00 | 2.5E-04 | 0.0E+00 | 1.8E-03 | 9.5E-05 | 0.0E+00 | 0.0E+00 | 1.1E-02 | 0.0E+00 | 0.0E+00 | 0.0E+00 | 0.0E+00 | 3.0E-04 | 0.0E+00 | 0.0E+00 | 0.0E+00 | 0.0E+00 | 1.3E-02 |
| KEOST2014-2015 | 6         | 2014/9/29  | 2014/10/17                                          | 0.0E+00 | 0.0E+00 | 3.3E-04 | 2.1E-03 | 2.4E-02 | 0.0E+00 | 0.0E+00 | 1.9E-03 | 1.4E-15 | 0.0E+00 | 0.0E+00 | 0.0E+00 | 6.6E-15 | 0.0E+00 | 0.0E+00 | 0.0E+00 | 2.2E-03 | 3.0E-02 |
| KEOST2014-2015 | 7         | 2014/10/17 | 2014/11/4                                           | 0.0E+00 | 0.0E+00 | 5.1E-04 | 3.8E-03 | 0.0E+00 | 0.0E+00 | 0.0E+00 | 1.8E-02 | 0.0E+00 | 0.0E+00 | 0.0E+00 | 0.0E+00 | 4.6E-04 | 0.0E+00 | 0.0E+00 | 0.0E+00 | 0.0E+00 | 2.3E-02 |
| KEOST2014-2015 | 8         | 2014/11/4  | 2014/11/22                                          | 0.0E+00 | 0.0E+00 | 0.0E+00 | 3.4E-03 | 4.5E-04 | 0.0E+00 | 0.0E+00 | 1.9E-03 | 0.0E+00 | 0.0E+00 | 0.0E+00 | 0.0E+00 | 1.0E-04 | 0.0E+00 | 0.0E+00 | 1.1E-03 | 0.0E+00 | 7.0E-03 |
| KEOST2014-2015 | 9         | 2014/11/22 | 2014/12/10                                          | 0.0E+00 | 0.0E+00 | 1.0E-04 | 0.0E+00 | 0.0E+00 | 0.0E+00 | 0.0E+00 | 8.2E-03 | 0.0E+00 | 0.0E+00 | 0.0E+00 | 0.0E+00 | 3.0E-04 | 0.0E+00 | 0.0E+00 | 0.0E+00 | 3.8E-04 | 9.0E-03 |
| KEOST2014-2015 | 10        | 2014/12/10 | 2014/12/28                                          | 0.0E+00 | 0.0E+00 | 6.1E-04 | 3.2E-03 | 4.5E-04 | 0.0E+00 | 1.9E-03 | 2.5E-03 | 2.1E-03 | 0.0E+00 | 0.0E+00 | 0.0E+00 | 6.8E-04 | 0.0E+00 | 0.0E+00 | 1.4E-04 | 0.0E+00 | 1.2E-02 |
| KEOST2014-2015 | 11        | 2014/12/28 | 2015/1/15                                           | 0.0E+00 | 0.0E+00 | 5.1E-04 | 1.5E-03 | 6.3E-04 | 0.0E+00 | 0.0E+00 | 4.8E-04 | 0.0E+00 | 9.2E-03 | 5.0E-04 | 0.0E+00 | 0.0E+00 | 0.0E+00 | 0.0E+00 | 0.0E+00 | 5.2E-03 | 1.8E-02 |
| KEOST2014-2015 | 12        | 2015/1/15  | 2015/2/2                                            | 2.8E-04 | 6.2E-02 | 1.7E-01 | 2.0E-03 | 0.0E+00 | 0.0E+00 | 0.0E+00 | 3.5E-03 | 5.0E-15 | 0.0E+00 | 0.0E+00 | 0.0E+00 | 0.0E+00 | 0.0E+00 | 0.0E+00 | 1.9E-04 | 0.0E+00 | 2.4E-01 |
| KEOST2014-2015 | 13        | 2015/2/2   | 2015/2/20                                           | 0.0E+00 | 0.0E+00 | 1.6E-01 | 0.0E+00 | 3.6E-04 | 0.0E+00 | 0.0E+00 | 4.4E-03 | 0.0E+00 | 0.0E+00 | 0.0E+00 | 0.0E+00 | 1.9E-03 | 0.0E+00 | 0.0E+00 | 0.0E+00 | 1.0E-03 | 1.7E-01 |
| KEOST2014-2015 | 14        | 2015/2/20  | 2015/3/10                                           | 0.0E+00 | 7.9E-16 | 1.6E-03 | 1.0E-03 | 4.2E-04 | 0.0E+00 | 0.0E+00 | 3.1E-03 | 2.1E-03 | 0.0E+00 | 0.0E+00 | 2.2E-04 | 4.5E-03 | 0.0E+00 | 0.0E+00 | 9.2E-04 | 0.0E+00 | 1.4E-02 |
| KEOST2014-2015 | 15        | 2015/3/10  | 2015/3/28                                           | 0.0E+00 | 2.8E-03 | 1.4E-03 | 1.0E-03 | 0.0E+00 | 0.0E+00 | 0.0E+00 | 6.3E-04 | 1.5E-04 | 0.0E+00 | 0.0E+00 | 0.0E+00 | 5.4E-04 | 0.0E+00 | 0.0E+00 | 0.0E+00 | 0.0E+00 | 6.6E-03 |
| KEOST2014-2015 | 16        | 2015/3/28  | 2015/4/15                                           | 0.0E+00 | 3.3E-15 | 0.0E+00 | 0.0E+00 | 1.2E-01 | 0.0E+00 | 0.0E+00 | 4.0E-04 | 0.0E+00 | 0.0E+00 | 0.0E+00 | 2.0E-04 | 5.3E-04 | 0.0E+00 | 0.0E+00 | 5.0E-04 | 0.0E+00 | 1.2E-01 |
| KEOST2014-2015 | 17        | 2015/4/15  | 2015/5/3                                            | 0.0E+00 | 0.0E+00 | 9.2E-04 | 4.2E-03 | 0.0E+00 | 0.0E+00 | 0.0E+00 | 3.1E-03 | 6.9E-14 | 0.0E+00 | 0.0E+00 | 0.0E+00 | 0.0E+00 | 0.0E+00 | 0.0E+00 | 0.0E+00 | 6.1E-02 | 6.9E-02 |
| KEOST2014-2015 | 18        | 2015/5/3   | 2015/5/21                                           | 0.0E+00 | 0.0E+00 | 0.0E+00 | 6.9E-03 | 2.5E-03 | 0.0E+00 | 0.0E+00 | 4.2E-03 | 0.0E+00 | 0.0E+00 | 0.0E+00 | 0.0E+00 | 0.0E+00 | 0.0E+00 | 0.0E+00 | 0.0E+00 | 0.0E+00 | 1.4E-02 |
| KEOST2014-2015 | 19        | 2015/5/21  | 2015/6/8                                            | 0.0E+00 | 4.4E-04 | 4.2E-02 | 3.2E-03 | 8.6E-04 | 0.0E+00 | 0.0E+00 | 3.9E-03 | 0.0E+00 | 0.0E+00 | 8.4E-04 | 0.0E+00 | 0.0E+00 | 0.0E+00 | 0.0E+00 | 0.0E+00 | 0.0E+00 | 5.1E-02 |
| KEOST2014-2015 | 20        | 2015/6/8   | 2015/6/26                                           | 0.0E+00 | 7.9E-03 | 3.2E-03 | 0.0E+00 | 0.0E+00 | 0.0E+00 | 0.0E+00 | 3.2E-03 | 0.0E+00 | 0.0E+00 | 0.0E+00 | 0.0E+00 | 1.2E-03 | 3.4E-03 | 0.0E+00 | 2.1E-03 | 0.0E+00 | 2.1E-02 |
| KEOST2014-2015 | 21        | 2015/6/26  | 2015/7/14                                           | 1.7E-03 | 6.6E-04 | 0.0E+00 | 3.0E-03 | 5.3E-03 | 0.0E+00 | 8.5E-03 | 3.8E-03 | 0.0E+00 | 0.0E+00 | 7.0E-04 | 0.0E+00 | 0.0E+00 | 0.0E+00 | 0.0E+00 | 0.0E+00 | 1.5E-03 | 2.5E-02 |
| KEOST2015-2016 | 1         | 2015/9/10  | 2015/9/28                                           | 8.3E-04 | 0.0E+00 | 2.4E-03 | 0.0E+00 | 0.0E+00 | 2.6E-04 | 0.0E+00 | 1.1E-02 | 6.6E-04 | 0.0E+00 | 0.0E+00 | 0.0E+00 | 9.2E-16 | 0.0E+00 | 3.2E-16 | 0.0E+00 | 3.8E-04 | 1.6E-02 |
| KEOST2015-2016 | 2         | 2015/9/28  | 2015/10/16                                          | 0.0E+00 | 7.3E-04 | 2.9E-02 | 6.7E-04 | 0.0E+00 | 0.0E+00 | 0.0E+00 | 2.5E-03 | 3.3E-04 | 0.0E+00 | 0.0E+00 | 0.0E+00 | 0.0E+00 | 0.0E+00 | 0.0E+00 | 0.0E+00 | 1.5E-02 | 4.7E-02 |
| KEOST2015-2016 | 3         | 2015/10/16 | 2015/11/3                                           | 0.0E+00 | 0.0E+00 | 0.0E+00 | 6.8E-04 | 7.6E-04 | 7.7E-04 | 0.0E+00 | 0.0E+00 | 2.4E-02 | 0.0E+00 | 0.0E+00 | 0.0E+00 | 0.0E+00 | 0.0E+00 | 0.0E+00 | 0.0E+00 | 0.0E+00 | 2.7E-02 |
| KEOST2015-2016 | 4         | 2015/11/3  | 2015/11/21                                          | 0.0E+00 | 0.0E+00 | 0.0E+00 | 0.0E+00 | 1.8E-03 | 0.0E+00 | 0.0E+00 | 2.5E-02 | 0.0E+00 | 0.0E+00 | 0.0E+00 | 0.0E+00 | 2.8E-03 | 0.0E+00 | 0.0E+00 | 0.0E+00 | 0.0E+00 | 3.0E-02 |
| KEOST2015-2016 | 5         | 2015/11/21 | 2015/12/9                                           | 0.0E+00 | 0.0E+00 | 1.3E-03 | 1.9E-03 | 0.0E+00 | 0.0E+00 | 0.0E+00 | 8.4E-03 | 0.0E+00 | 0.0E+00 | 0.0E+00 | 0.0E+00 | 1.5E-03 | 0.0E+00 | 0.0E+00 | 0.0E+00 | 0.0E+00 | 1.3E-02 |
| KEOST2015-2016 | 6         | 2015/12/9  | 2015/12/27                                          | 0.0E+00 | 1.2E-02 | 0.0E+00 | 0.0E+00 | 4.3E-04 | 0.0E+00 | 0.0E+00 | 8.0E-03 | 0.0E+00 | 0.0E+00 | 0.0E+00 | 0.0E+00 | 0.0E+00 | 0.0E+00 | 0.0E+00 | 0.0E+00 | 1.0E-02 | 3.0E-02 |
| KEOST2015-2016 | 7         | 2015/12/27 | 2016/1/14                                           | 0.0E+00 | 8.7E-03 | 0.0E+00 | 3.0E-03 | 1.7E-03 | 0.0E+00 | 0.0E+00 | 3.7E-03 | 1.3E-02 | 0.0E+00 | 0.0E+00 | 0.0E+00 | 8.4E-04 | 0.0E+00 | 0.0E+00 | 0.0E+00 | 1.1E-15 | 3.1E-02 |
| KEOST2015-2016 | 8         | 2016/1/14  | 2016/2/1                                            | 0.0E+00 | 0.0E+00 | 8.2E-04 | 0.0E+00 | 1.2E-03 | 0.0E+00 | 0.0E+00 | 8.5E-04 | 3.4E-15 | 0.0E+00 | 0.0E+00 | 0.0E+00 | 3.0E-04 | 0.0E+00 | 0.0E+00 | 0.0E+00 | 0.0E+00 | 3.2E-03 |
| KEOST2015-2016 | 9         | 2016/2/1   | 2016/2/19                                           | 0.0E+00 | 0.0E+00 | 0.0E+00 | 1.2E-03 | 7.6E-04 | 1.2E-03 | 0.0E+00 | 3.7E-03 | 2.9E-15 | 0.0E+00 | 0.0E+00 | 0.0E+00 | 6.8E-04 | 0.0E+00 | 0.0E+00 | 0.0E+00 | 0.0E+00 | 7.5E-03 |
| KEOST2015-2016 | 10        | 2016/2/19  | 2016/3/8                                            | 0.0E+00 | 0.0E+00 | 0.0E+00 | 4.5E-04 | 6.3E-04 | 0.0E+00 | 0.0E+00 | 5.0E-03 | 5.8E-04 | 0.0E+00 | 0.0E+00 | 0.0E+00 | 0.0E+00 | 0.0E+00 | 0.0E+00 | 1.3E-15 | 0.0E+00 | 6.7E-03 |
| KEOST2015-2016 | 11        | 2016/3/8   | 2016/3/26                                           | 0.0E+00 | 0.0E+00 | 0.0E+00 | 0.0E+00 | 2.4E-03 | 0.0E+00 | 0.0E+00 | 2.8E-03 | 2.2E-02 | 0.0E+00 | 0.0E+00 | 0.0E+00 | 1.5E-03 | 0.0E+00 | 0.0E+00 | 0.0E+00 | 0.0E+00 | 2.9E-02 |
| KEOST2015-2016 | 12        | 2016/3/26  | 2016/4/13                                           | 5.2E-03 | 0.0E+00 | 4.5E-03 | 0.0E+00 | 0.0E+00 | 0.0E+00 | 0.0E+00 | 1.0E-02 | 5.5E-03 | 0.0E+00 | 0.0E+00 | 0.0E+00 | 0.0E+00 | 0.0E+00 | 0.0E+00 | 0.0E+00 | 0.0E+00 | 2.6E-02 |
| KEOST2015-2016 | 13        | 2016/4/13  | 2016/5/1                                            | 0.0E+00 | 0.0E+00 | 6.9E-03 | 0.0E+00 | 6.8E-03 | 0.0E+00 | 0.0E+00 | 1.4E-03 | 5.6E-03 | 0.0E+00 | 0.0E+00 | 0.0E+00 | 7.6E-04 | 0.0E+00 | 0.0E+00 | 0.0E+00 | 0.0E+00 | 2.2E-02 |
| KEOST2015-2016 | 14        | 2016/5/1   | 2016/5/19                                           | 3.7E-04 | 0.0E+00 | 8.3E-03 | 0.0E+00 | 0.0E+00 | 0.0E+00 | 0.0E+00 | 7.1E-04 | 2.7E-15 | 0.0E+00 | 0.0E+00 | 0.0E+00 | 2.3E-04 | 0.0E+00 | 0.0E+00 | 0.0E+00 | 0.0E+00 | 9.6E-03 |
| KEOST2015-2016 | 15        | 2016/5/19  | 2016/6/6                                            | 0.0E+00 | 0.0E+00 | 0.0E+00 | 0.0E+00 | 8.6E-04 | 0.0E+00 | 0.0E+00 | 4.4E-03 | 0.0E+00 | 0.0E+00 | 0.0E+00 | 0.0E+00 | 0.0E+00 | 0.0E+00 | 0.0E+00 | 0.0E+00 | 7.6E-04 | 6.0E-03 |
| KEOST2015-2016 | 16        | 2016/6/6   | 2016/6/24                                           | 0.0E+00 | 0.0E+00 | 0.0E+00 | 7.5E-04 | 2.5E-03 | 2.8E-03 | 0.0E+00 | 0.0E+00 | 1.3E-14 | 0.0E+00 | 0.0E+00 | 0.0E+00 | 6.1E-04 | 0.0E+00 | 2.3E-03 | 0.0E+00 | 0.0E+00 | 9.0E-03 |
| KEOST2016-2017 | 1         | 2016/7/10  | 2016/7/31                                           | 0.0E+00 | 0.0E+00 | 1.8E-03 | 0.0E+00 | 0.0E+00 | 6.6E-04 | 0.0E+00 | 1.7E-02 | 1.7E-03 | 0.0E+00 | 1.3E-15 | 0.0E+00 | 0.0E+00 | 0.0E+00 | 0.0E+00 | 0.0E+00 | 0.0E+00 | 2.1E-02 |
| KEOST2016-2017 | 2         | 2016/7/31  | 2016/8/21                                           | 0.0E+00 | 1.2E-16 | 0.0E+00 | 3.6E-03 | 0.0E+00 | 0.0E+00 | 0.0E+00 | 1.2E-01 | 0.0E+00 | 0.0E+00 | 0.0E+00 | 0.0E+00 | 3.9E-04 | 0.0E+00 | 0.0E+00 | 0.0E+00 | 2.3E-03 | 1.3E-01 |
| KEOST2016-2017 | 3         | 2016/8/21  | 2016/9/11                                           | 0.0E+00 | 2.5E-16 | 0.0E+00 | 2.1E-03 | 0.0E+00 | 0.0E+00 | 0.0E+00 | 8.4E-03 | 2.4E-03 | 0.0E+00 | 0.0E+00 | 0.0E+00 | 0.0E+00 | 0.0E+00 | 0.0E+00 | 0.0E+00 | 6.6E-04 | 1.4E-02 |
| KEOST2016-2017 | 4         | 2016/9/11  | 2016/10/2                                           | 0.0E+00 | 0.0E+00 | 0.0E+00 | 3.0E-03 | 0.0E+00 | 0.0E+00 | 0.0E+00 | 2.7E-03 | 0.0E+00 | 0.0E+00 | 0.0E+00 | 0.0E+00 | 3.4E-03 | 0.0E+00 | 0.0E+00 | 0.0E+00 | 0.0E+00 | 9.1E-03 |

Table S14. Summary and calculated volume and mass of individual microplastic particles in sediment in the western North Pacific as reported by Tsuchiya<sup>7</sup>. Polymer-type abbreviations are as shown in Table S1

| Station | Core | Sediment layer (cm) | Oceanographic setting | Area       | Particle number in Tsuchiya et al. (2024) | Major axis (μm) | Minor axis (μm) | Polymer type | Shape | Aspect ratio | Volume (cm <sup>3</sup> ) | Mass (g) |
|---------|------|---------------------|-----------------------|------------|-------------------------------------------|-----------------|-----------------|--------------|-------|--------------|---------------------------|----------|
| St. 1   | a    | 0–1                 | Bathyal (slope)       | Sagami Bay | 1                                         | 234.9           | 110.5           | EVA          | grain | 0.47         | 7.7E-07                   | 7.2E-07  |
| St. 1   | a    | 0–1                 | Bathyal (slope)       | Sagami Bay | 2                                         | 128.0           | 65.9            | PE           | grain | 0.51         | 1.5E-07                   | 1.4E-07  |
| St. 1   | a    | 0–1                 | Bathyal (slope)       | Sagami Bay | 3                                         | 106.1           | 55.3            | PE           | grain | 0.52         | 8.7E-08                   | 8.3E-08  |
| St. 1   | a    | 0–1                 | Bathyal (slope)       | Sagami Bay | 6                                         | 71.4            | 41.4            | PP           | grain | 0.58         | 3.3E-08                   | 3.0E-08  |
| St. 1   | a    | 0–1                 | Bathyal (slope)       | Sagami Bay | 7                                         | 38.8            | 14.5            | PP           | grain | 0.37         | 2.2E-09                   | 2.0E-09  |
| St. 1   | b    | 0–1                 | Bathyal (slope)       | Sagami Bay | 2                                         | 126.4           | 75.2            | PP           | grain | 0.59         | 1.9E-07                   | 1.7E-07  |
| St. 1   | b    | 0–1                 | Bathyal (slope)       | Sagami Bay | 3                                         | 42.9            | 28.0            | PP           | grain | 0.65         | 9.1E-09                   | 8.2E-09  |
| St. 1   | b    | 0–1                 | Bathyal (slope)       | Sagami Bay | 4                                         | 183.0           | 58.8            | PP           | grain | 0.32         | 1.7E-07                   | 1.5E-07  |
| St. 1   | b    | 0–1                 | Bathyal (slope)       | Sagami Bay | 5                                         | 93.6            | 28.5            | PS           | grain | 0.30         | 2.0E-08                   | 2.1E-08  |
| St. 1   | b    | 0–1                 | Bathyal (slope)       | Sagami Bay | 6                                         | 66.7            | 45.0            | PE           | grain | 0.67         | 3.6E-08                   | 3.4E-08  |
| St. 1   | b    | 0–1                 | Bathyal (slope)       | Sagami Bay | 7                                         | 89.8            | 51.8            | PE           | grain | 0.58         | 6.5E-08                   | 6.1E-08  |
| St. 1   | b    | 0–1                 | Bathyal (slope)       | Sagami Bay | 8                                         | 59.1            | 19.4            | PE           | grain | 0.33         | 6.0E-09                   | 5.7E-09  |
| St. 1   | b    | 0–1                 | Bathyal (slope)       | Sagami Bay | 9                                         | 79.7            | 49.5            | PE           | grain | 0.62         | 5.3E-08                   | 5.0E-08  |
| St. 1   | b    | 0–1                 | Bathyal (slope)       | Sagami Bay | 10                                        | 174.9           | 74.4            | PE           | grain | 0.43         | 2.6E-07                   | 2.5E-07  |
| St. 1   | b    | 0–1                 | Bathyal (slope)       | Sagami Bay | 12                                        | 144.2           | 20.7            | PET          | grain | 0.14         | 1.7E-08                   | 2.2E-08  |
| St. 1   | b    | 0–1                 | Bathyal (slope)       | Sagami Bay | 13                                        | 46.1            | 31.8            | PP           | grain | 0.69         | 1.3E-08                   | 1.1E-08  |
| St. 1   | c    | 0–1                 | Bathyal (slope)       | Sagami Bay | 1                                         | 67.9            | 33.6            | PE           | grain | 0.49         | 2.1E-08                   | 1.9E-08  |
| St. 1   | c    | 0–1                 | Bathyal (slope)       | Sagami Bay | 2                                         | 152.6           | 40.4            | PET          | grain | 0.26         | 6.7E-08                   | 9.1E-08  |
| St. 1   | c    | 0–1                 | Bathyal (slope)       | Sagami Bay | 4                                         | 109.7           | 39.4            | PP           | grain | 0.36         | 4.6E-08                   | 4.2E-08  |
| St. 1   | c    | 0–1                 | Bathyal (slope)       | Sagami Bay | 5                                         | 43.4            | 19.3            | PP           | grain | 0.44         | 4.4E-09                   | 3.9E-09  |
| St. 1   | c    | 0–1                 | Bathyal (slope)       | Sagami Bay | 6                                         | 75.6            | 42.9            | PP           | grain | 0.57         | 3.8E-08                   | 3.4E-08  |
| St. 1   | c    | 0–1                 | Bathyal (slope)       | Sagami Bay | 7                                         | 159.5           | 123.7           | PP           | grain | 0.78         | 6.6E-07                   | 6.0E-07  |
| St. 1   | c    | 0–1                 | Bathyal (slope)       | Sagami Bay | 8                                         | 31.3            | 20.2            | PP           | grain | 0.65         | 3.4E-09                   | 3.1E-09  |



|       |   |     |                         |            |    |       |       |       |       |      |         |         |
|-------|---|-----|-------------------------|------------|----|-------|-------|-------|-------|------|---------|---------|
| St. 2 | a | 0-1 | Bathyal (central basin) | Sagami Bay | 1  | 47.5  | 33.6  | EVOH  | grain | 0.71 | 1.7E-08 | 1.9E-08 |
| St. 2 | a | 0-1 | Bathyal (central basin) | Sagami Bay | 2  | 105.2 | 31.4  | PET   | grain | 0.30 | 3.2E-08 | 4.4E-08 |
| St. 2 | a | 0-1 | Bathyal (central basin) | Sagami Bay | 3  | 51.2  | 27.5  | PET   | grain | 0.54 | 1.2E-08 | 1.6E-08 |
| St. 2 | a | 0-1 | Bathyal (central basin) | Sagami Bay | 4  | 33.2  | 32.7  | PMP   | beads | 0.98 | 1.1E-08 | 9.3E-09 |
| St. 2 | a | 0-1 | Bathyal (central basin) | Sagami Bay | 5  | 44.3  | 20.8  | PP    | grain | 0.47 | 6.0E-09 | 5.4E-09 |
| St. 2 | a | 0-1 | Bathyal (central basin) | Sagami Bay | 6  | 50.0  | 16.5  | PP    | grain | 0.33 | 4.2E-09 | 3.8E-09 |
| St. 2 | a | 0-1 | Bathyal (central basin) | Sagami Bay | 7  | 56.9  | 28.5  | PP    | grain | 0.50 | 1.4E-08 | 1.3E-08 |
| St. 2 | a | 0-1 | Bathyal (central basin) | Sagami Bay | 8  | 158.7 | 42.3  | PP    | grain | 0.27 | 8.8E-08 | 8.0E-08 |
| St. 2 | a | 0-1 | Bathyal (central basin) | Sagami Bay | 9  | 54.9  | 26.3  | PS    | grain | 0.48 | 1.2E-08 | 1.2E-08 |
| St. 2 | a | 0-1 | Bathyal (central basin) | Sagami Bay | 10 | 334.6 | 246.6 | VC/VA | grain | 0.74 | 6.3E-06 | 8.6E-06 |
| St. 2 | a | 0-1 | Bathyal (central basin) | Sagami Bay | 11 | 194.0 | 151.1 | PE    | grain | 0.78 | 1.4E-06 | 1.3E-06 |
| St. 2 | a | 0-1 | Bathyal (central basin) | Sagami Bay | 12 | 60.4  | 36.4  | PE    | grain | 0.60 | 2.5E-08 | 2.4E-08 |
| St. 2 | a | 0-1 | Bathyal (central basin) | Sagami Bay | 13 | 86.5  | 39.3  | PE    | grain | 0.45 | 4.2E-08 | 3.9E-08 |
| St. 2 | a | 0-1 | Bathyal (central basin) | Sagami Bay | 14 | 97.9  | 48.2  | PE    | grain | 0.49 | 7.1E-08 | 6.7E-08 |
| St. 2 | a | 0-1 | Bathyal (central basin) | Sagami Bay | 15 | 61.3  | 13.2  | PE    | grain | 0.22 | 3.3E-09 | 3.1E-09 |
| St. 2 | a | 0-1 | Bathyal (central basin) | Sagami Bay | 16 | 51.9  | 18.2  | PET   | grain | 0.35 | 5.4E-09 | 7.2E-09 |
| St. 2 | b | 0-1 | Bathyal (central basin) | Sagami Bay | 1  | 34.4  | 23.6  | EVA   | grain | 0.69 | 6.0E-09 | 5.5E-09 |
| St. 2 | b | 0-1 | Bathyal (central basin) | Sagami Bay | 2  | 39.9  | 28.1  | PE    | grain | 0.70 | 9.8E-09 | 9.3E-09 |
| St. 2 | b | 0-1 | Bathyal (central basin) | Sagami Bay | 3  | 90.7  | 38.7  | PE    | grain | 0.43 | 4.2E-08 | 4.0E-08 |
| St. 2 | b | 0-1 | Bathyal (central basin) | Sagami Bay | 4  | 47.5  | 40.0  | PET   | grain | 0.84 | 2.4E-08 | 3.2E-08 |
| St. 2 | b | 0-1 | Bathyal (central basin) | Sagami Bay | 5  | 63.6  | 41.2  | PMMA  | grain | 0.65 | 3.4E-08 | 4.0E-08 |
| St. 2 | b | 0-1 | Bathyal (central basin) | Sagami Bay | 6  | 301.5 | 117.9 | PMMA  | grain | 0.39 | 1.3E-06 | 1.5E-06 |
| St. 2 | b | 0-1 | Bathyal (central basin) | Sagami Bay | 7  | 46.6  | 22.9  | PMMA  | grain | 0.49 | 7.6E-09 | 9.0E-09 |
| St. 2 | b | 0-1 | Bathyal (central basin) | Sagami Bay | 8  | 98.5  | 74.6  | PP    | grain | 0.76 | 1.7E-07 | 1.5E-07 |
| St. 2 | b | 0-1 | Bathyal (central basin) | Sagami Bay | 9  | 63.6  | 44.4  | PP    | grain | 0.70 | 3.9E-08 | 3.5E-08 |
| St. 2 | b | 0-1 | Bathyal (central basin) | Sagami Bay | 10 | 43.8  | 19.3  | PP    | grain | 0.44 | 5.1E-09 | 4.6E-09 |
| St. 2 | b | 0-1 | Bathyal (central basin) | Sagami Bay | 11 | 49.5  | 32.1  | PP    | grain | 0.65 | 1.6E-08 | 1.4E-08 |
| St. 2 | b | 0-1 | Bathyal (central basin) | Sagami Bay | 12 | 52.1  | 39.3  | EVOH  | grain | 0.75 | 2.5E-08 | 2.9E-08 |
| St. 2 | b | 0-1 | Bathyal (central basin) | Sagami Bay | 13 | 29.5  | 28.0  | PP    | grain | 0.95 | 7.2E-09 | 6.5E-09 |

|       |   |     |                         |            |    |       |       |      |       |      |         |         |
|-------|---|-----|-------------------------|------------|----|-------|-------|------|-------|------|---------|---------|
| St. 2 | b | 0-1 | Bathyal (central basin) | Sagami Bay | 14 | 53.6  | 34.7  | PP   | grain | 0.65 | 2.0E-08 | 1.8E-08 |
| St. 2 | b | 0-1 | Bathyal (central basin) | Sagami Bay | 15 | 54.8  | 36.8  | PP   | grain | 0.67 | 2.3E-08 | 2.1E-08 |
| St. 2 | b | 0-1 | Bathyal (central basin) | Sagami Bay | 16 | 83.2  | 74.2  | PP   | grain | 0.89 | 1.4E-07 | 1.3E-07 |
| St. 2 | b | 0-1 | Bathyal (central basin) | Sagami Bay | 17 | 36.8  | 30.6  | PS   | grain | 0.83 | 1.1E-08 | 1.1E-08 |
| St. 2 | b | 0-1 | Bathyal (central basin) | Sagami Bay | 18 | 75.3  | 32.2  | PS   | grain | 0.43 | 2.4E-08 | 2.5E-08 |
| St. 2 | b | 0-1 | Bathyal (central basin) | Sagami Bay | 19 | 57.0  | 38.0  | EVOH | grain | 0.67 | 2.6E-08 | 2.9E-08 |
| St. 2 | b | 0-1 | Bathyal (central basin) | Sagami Bay | 20 | 50.8  | 38.0  | EVOH | grain | 0.75 | 2.3E-08 | 2.6E-08 |
| St. 2 | b | 0-1 | Bathyal (central basin) | Sagami Bay | 21 | 72.9  | 32.3  | PE   | grain | 0.44 | 2.4E-08 | 2.2E-08 |
| St. 2 | b | 0-1 | Bathyal (central basin) | Sagami Bay | 22 | 79.5  | 41.2  | PE   | grain | 0.52 | 4.2E-08 | 4.0E-08 |
| St. 2 | b | 0-1 | Bathyal (central basin) | Sagami Bay | 23 | 19.9  | 14.3  | PE   | grain | 0.72 | 1.3E-09 | 1.2E-09 |
| St. 2 | b | 0-1 | Bathyal (central basin) | Sagami Bay | 24 | 24.6  | 13.6  | PE   | grain | 0.55 | 1.4E-09 | 1.3E-09 |
| St. 2 | b | 0-1 | Bathyal (central basin) | Sagami Bay | 25 | 52.2  | 32.6  | PE   | grain | 0.62 | 1.7E-08 | 1.6E-08 |
| St. 2 | c | 0-1 | Bathyal (basin central) | Sagami Bay | 1  | 35.4  | 33.4  | EVOH | grain | 0.94 | 1.2E-08 | 1.4E-08 |
| St. 2 | c | 0-1 | Bathyal (basin central) | Sagami Bay | 2  | 44.9  | 20.3  | PE   | grain | 0.45 | 5.8E-09 | 5.4E-09 |
| St. 2 | c | 0-1 | Bathyal (basin central) | Sagami Bay | 3  | 99.5  | 26.4  | PET  | grain | 0.27 | 2.2E-08 | 2.9E-08 |
| St. 2 | c | 0-1 | Bathyal (basin central) | Sagami Bay | 4  | 33.6  | 21.9  | PET  | grain | 0.65 | 5.0E-09 | 6.8E-09 |
| St. 2 | c | 0-1 | Bathyal (basin central) | Sagami Bay | 5  | 40.8  | 29.0  | PET  | grain | 0.71 | 1.1E-08 | 1.4E-08 |
| St. 2 | c | 0-1 | Bathyal (basin central) | Sagami Bay | 6  | 30.9  | 12.4  | PET  | grain | 0.40 | 1.5E-09 | 2.0E-09 |
| St. 2 | c | 0-1 | Bathyal (basin central) | Sagami Bay | 7  | 33.5  | 27.0  | PET  | grain | 0.81 | 7.6E-09 | 1.0E-08 |
| St. 2 | c | 0-1 | Bathyal (basin central) | Sagami Bay | 8  | 151.4 | 149.0 | PMMA | grain | 0.98 | 1.0E-06 | 1.2E-06 |
| St. 2 | c | 0-1 | Bathyal (basin central) | Sagami Bay | 9  | 30.2  | 24.2  | PP   | grain | 0.80 | 5.5E-09 | 5.0E-09 |
| St. 2 | c | 0-1 | Bathyal (basin central) | Sagami Bay | 10 | 38.6  | 16.1  | PP   | grain | 0.42 | 3.1E-09 | 2.8E-09 |
| St. 2 | c | 0-1 | Bathyal (basin central) | Sagami Bay | 11 | 77.2  | 31.4  | PP   | grain | 0.41 | 2.4E-08 | 2.1E-08 |
| St. 2 | c | 0-1 | Bathyal (basin central) | Sagami Bay | 12 | 42.7  | 32.0  | EVOH | grain | 0.75 | 1.4E-08 | 1.6E-08 |
| St. 2 | c | 0-1 | Bathyal (basin central) | Sagami Bay | 13 | 38.1  | 25.4  | PP   | grain | 0.67 | 7.7E-09 | 6.9E-09 |
| St. 2 | c | 0-1 | Bathyal (basin central) | Sagami Bay | 14 | 50.0  | 26.8  | PP   | grain | 0.54 | 1.1E-08 | 1.0E-08 |
| St. 2 | c | 0-1 | Bathyal (basin central) | Sagami Bay | 15 | 82.1  | 41.9  | PP   | grain | 0.51 | 4.5E-08 | 4.1E-08 |
| St. 2 | c | 0-1 | Bathyal (basin central) | Sagami Bay | 16 | 29.5  | 19.0  | PP   | grain | 0.64 | 3.3E-09 | 3.0E-09 |
| St. 2 | c | 0-1 | Bathyal (basin central) | Sagami Bay | 17 | 22.5  | 21.5  | PP   | grain | 0.96 | 3.2E-09 | 2.9E-09 |

|       |   |     |                         |                          |    |       |       |      |       |      |         |         |
|-------|---|-----|-------------------------|--------------------------|----|-------|-------|------|-------|------|---------|---------|
| St. 2 | c | 0-1 | Bathyal (basin central) | Sagami Bay               | 18 | 49.1  | 27.6  | PP   | grain | 0.56 | 1.2E-08 | 1.1E-08 |
| St. 2 | c | 0-1 | Bathyal (basin central) | Sagami Bay               | 19 | 32.0  | 15.9  | PP   | grain | 0.50 | 2.5E-09 | 2.3E-09 |
| St. 2 | c | 0-1 | Bathyal (basin central) | Sagami Bay               | 20 | 46.7  | 27.4  | PP   | grain | 0.59 | 1.1E-08 | 9.9E-09 |
| St. 2 | c | 0-1 | Bathyal (basin central) | Sagami Bay               | 21 | 170.6 | 149.1 | PP   | grain | 0.87 | 1.2E-06 | 1.1E-06 |
| St. 2 | c | 0-1 | Bathyal (basin central) | Sagami Bay               | 22 | 55.3  | 36.7  | PP   | grain | 0.66 | 2.3E-08 | 2.1E-08 |
| St. 2 | c | 0-1 | Bathyal (basin central) | Sagami Bay               | 23 | 52.2  | 38.1  | EVOH | grain | 0.73 | 2.4E-08 | 2.7E-08 |
| St. 2 | c | 0-1 | Bathyal (basin central) | Sagami Bay               | 24 | 63.2  | 30.3  | PP   | grain | 0.48 | 1.8E-08 | 1.6E-08 |
| St. 2 | c | 0-1 | Bathyal (basin central) | Sagami Bay               | 25 | 46.9  | 37.1  | PP   | grain | 0.79 | 2.0E-08 | 1.8E-08 |
| St. 2 | c | 0-1 | Bathyal (basin central) | Sagami Bay               | 26 | 29.7  | 17.3  | PP   | grain | 0.58 | 2.8E-09 | 2.5E-09 |
| St. 2 | c | 0-1 | Bathyal (basin central) | Sagami Bay               | 27 | 96.3  | 31.0  | PP   | grain | 0.32 | 2.9E-08 | 2.6E-08 |
| St. 2 | c | 0-1 | Bathyal (basin central) | Sagami Bay               | 28 | 90.3  | 30.1  | PP   | grain | 0.33 | 2.5E-08 | 2.3E-08 |
| St. 2 | c | 0-1 | Bathyal (basin central) | Sagami Bay               | 29 | 100.8 | 26.4  | PS   | grain | 0.26 | 2.2E-08 | 2.3E-08 |
| St. 2 | c | 0-1 | Bathyal (basin central) | Sagami Bay               | 30 | 143.9 | 41.4  | PS   | grain | 0.29 | 7.7E-08 | 8.0E-08 |
| St. 2 | c | 0-1 | Bathyal (basin central) | Sagami Bay               | 31 | 90.6  | 47.7  | PS   | grain | 0.53 | 6.4E-08 | 6.7E-08 |
| St. 2 | c | 0-1 | Bathyal (basin central) | Sagami Bay               | 32 | 48.4  | 34.2  | EVOH | grain | 0.71 | 1.8E-08 | 2.0E-08 |
| St. 2 | c | 0-1 | Bathyal (basin central) | Sagami Bay               | 33 | 47.9  | 34.4  | PE   | grain | 0.72 | 1.8E-08 | 1.7E-08 |
| St. 2 | c | 0-1 | Bathyal (basin central) | Sagami Bay               | 34 | 138.6 | 49.9  | PE   | grain | 0.36 | 1.1E-07 | 1.0E-07 |
| St. 2 | c | 0-1 | Bathyal (basin central) | Sagami Bay               | 35 | 47.4  | 23.7  | PE   | grain | 0.50 | 8.3E-09 | 7.8E-09 |
| St. 2 | c | 0-1 | Bathyal (basin central) | Sagami Bay               | 36 | 20.1  | 17.7  | PE   | grain | 0.88 | 2.0E-09 | 1.8E-09 |
| St. 2 | c | 0-1 | Bathyal (basin central) | Sagami Bay               | 37 | 120.4 | 35.4  | PE   | grain | 0.29 | 4.7E-08 | 4.4E-08 |
| St. 4 | a | 0-1 | Hadal                   | Trench (triple junction) | 1  | 99.6  | 71.8  | EVOH | grain | 0.72 | 1.4E-07 | 1.6E-07 |
| St. 4 | a | 0-1 | Hadal                   | Trench (triple junction) | 2  | 86.8  | 39.2  | PET  | grain | 0.45 | 3.6E-08 | 4.9E-08 |
| St. 4 | a | 0-1 | Hadal                   | Trench (triple junction) | 3  | 113.3 | 21.9  | PET  | grain | 0.19 | 1.5E-08 | 2.0E-08 |
| St. 4 | a | 0-1 | Hadal                   | Trench (triple junction) | 4  | 54.9  | 28.3  | PET  | grain | 0.52 | 1.2E-08 | 1.6E-08 |
| St. 4 | a | 0-1 | Hadal                   | Trench (triple junction) | 5  | 41.3  | 16.7  | PET  | grain | 0.40 | 3.1E-09 | 4.2E-09 |
| St. 4 | a | 0-1 | Hadal                   | Trench (triple junction) | 6  | 137.3 | 73.5  | PP   | grain | 0.54 | 2.0E-07 | 1.8E-07 |
| St. 4 | a | 0-1 | Hadal                   | Trench (triple junction) | 7  | 223.6 | 127.8 | PP   | grain | 0.57 | 9.9E-07 | 8.9E-07 |
| St. 4 | a | 0-1 | Hadal                   | Trench (triple junction) | 8  | 59.3  | 27.1  | PP   | grain | 0.46 | 1.2E-08 | 1.1E-08 |
| St. 4 | a | 0-1 | Hadal                   | Trench (triple junction) | 9  | 43.1  | 34.7  | PP   | grain | 0.81 | 1.4E-08 | 1.3E-08 |

|       |   |     |       |                          |    |       |       |      |       |      |         |         |
|-------|---|-----|-------|--------------------------|----|-------|-------|------|-------|------|---------|---------|
| St. 4 | a | 0-1 | Hadal | Trench (triple junction) | 10 | 37.5  | 25.0  | EVOH | grain | 0.67 | 6.3E-09 | 7.3E-09 |
| St. 4 | a | 0-1 | Hadal | Trench (triple junction) | 11 | 40.3  | 35.1  | EVOH | grain | 0.87 | 1.3E-08 | 1.5E-08 |
| St. 4 | a | 0-1 | Hadal | Trench (triple junction) | 12 | 41.1  | 36.8  | EVOH | grain | 0.90 | 1.5E-08 | 1.7E-08 |
| St. 4 | a | 0-1 | Hadal | Trench (triple junction) | 13 | 34.9  | 22.0  | PE   | grain | 0.63 | 4.6E-09 | 4.3E-09 |
| St. 4 | a | 0-1 | Hadal | Trench (triple junction) | 14 | 50.8  | 32.7  | PE   | grain | 0.64 | 1.5E-08 | 1.4E-08 |
| St. 4 | a | 0-1 | Hadal | Trench (triple junction) | 15 | 60.1  | 31.1  | PE   | grain | 0.52 | 1.6E-08 | 1.5E-08 |
| St. 4 | a | 0-1 | Hadal | Trench (triple junction) | 16 | 160.2 | 71.3  | PE   | grain | 0.45 | 2.2E-07 | 2.1E-07 |
| St. 4 | a | 0-1 | Hadal | Trench (triple junction) | 17 | 34.4  | 28.9  | PE   | grain | 0.84 | 7.8E-09 | 7.3E-09 |
| St. 4 | b | 0-1 | Hadal | Trench (triple junction) | 1  | 96.7  | 36.4  | EVA  | grain | 0.38 | 3.5E-08 | 3.2E-08 |
| St. 4 | b | 0-1 | Hadal | Trench (triple junction) | 2  | 115.9 | 33.1  | PP   | grain | 0.29 | 3.4E-08 | 3.1E-08 |
| St. 4 | b | 0-1 | Hadal | Trench (triple junction) | 3  | 60.1  | 29.7  | PP   | grain | 0.49 | 1.4E-08 | 1.3E-08 |
| St. 4 | b | 0-1 | Hadal | Trench (triple junction) | 4  | 45.8  | 21.9  | PP   | grain | 0.48 | 5.9E-09 | 5.4E-09 |
| St. 4 | b | 0-1 | Hadal | Trench (triple junction) | 5  | 42.5  | 29.8  | PP   | grain | 0.70 | 1.0E-08 | 9.2E-09 |
| St. 4 | b | 0-1 | Hadal | Trench (triple junction) | 6  | 55.7  | 26.3  | PVC  | grain | 0.47 | 1.0E-08 | 1.5E-08 |
| St. 4 | b | 0-1 | Hadal | Trench (triple junction) | 7  | 43.6  | 20.5  | EVA  | grain | 0.47 | 5.0E-09 | 4.6E-09 |
| St. 4 | b | 0-1 | Hadal | Trench (triple junction) | 8  | 45.3  | 34.3  | PC   | grain | 0.76 | 1.4E-08 | 1.9E-08 |
| St. 4 | b | 0-1 | Hadal | Trench (triple junction) | 9  | 35.2  | 13.2  | PE   | grain | 0.38 | 1.7E-09 | 1.6E-09 |
| St. 4 | b | 0-1 | Hadal | Trench (triple junction) | 10 | 54.9  | 37.2  | PE   | grain | 0.68 | 2.1E-08 | 1.9E-08 |
| St. 4 | b | 0-1 | Hadal | Trench (triple junction) | 11 | 76.4  | 55.7  | PE   | grain | 0.73 | 6.4E-08 | 6.0E-08 |
| St. 4 | b | 0-1 | Hadal | Trench (triple junction) | 12 | 98.6  | 10.0  | PET  | grain | 0.10 | 2.7E-09 | 3.6E-09 |
| St. 4 | b | 0-1 | Hadal | Trench (triple junction) | 14 | 88.8  | 30.9  | PMMA | grain | 0.35 | 2.3E-08 | 2.7E-08 |
| St. 5 | a | 0-1 | Hadal | Trench (triple junction) | 1  | 110.3 | 59.8  | EVA  | grain | 0.54 | 1.0E-07 | 9.3E-08 |
| St. 5 | a | 0-1 | Hadal | Trench (triple junction) | 2  | 301.3 | 143.1 | PP   | grain | 0.47 | 1.6E-06 | 1.4E-06 |
| St. 5 | a | 0-1 | Hadal | Trench (triple junction) | 3  | 53.8  | 18.6  | PP   | grain | 0.35 | 4.7E-09 | 4.3E-09 |
| St. 5 | a | 0-1 | Hadal | Trench (triple junction) | 4  | 66.4  | 29.0  | PS   | grain | 0.44 | 1.4E-08 | 1.5E-08 |
| St. 5 | a | 0-1 | Hadal | Trench (triple junction) | 5  | 34.1  | 24.0  | EVA  | grain | 0.70 | 5.0E-09 | 4.6E-09 |
| St. 5 | a | 0-1 | Hadal | Trench (triple junction) | 6  | 31.4  | 18.7  | PE   | grain | 0.60 | 2.8E-09 | 2.6E-09 |
| St. 5 | a | 0-1 | Hadal | Trench (triple junction) | 7  | 89.2  | 37.6  | PE   | grain | 0.42 | 3.2E-08 | 3.0E-08 |
| St. 5 | a | 0-1 | Hadal | Trench (triple junction) | 8  | 98.4  | 27.2  | PET  | grain | 0.28 | 1.8E-08 | 2.5E-08 |

|       |   |     |         |                          |    |       |       |      |       |      |         |         |
|-------|---|-----|---------|--------------------------|----|-------|-------|------|-------|------|---------|---------|
| St. 5 | a | 0-1 | Hadal   | Trench (triple junction) | 9  | 47.3  | 37.3  | PP   | grain | 0.79 | 1.7E-08 | 1.5E-08 |
| St. 5 | a | 0-1 | Hadal   | Trench (triple junction) | 11 | 55.0  | 21.1  | PP   | grain | 0.38 | 6.2E-09 | 5.6E-09 |
| St. 5 | a | 0-1 | Hadal   | Trench (triple junction) | 12 | 59.4  | 40.3  | PP   | grain | 0.68 | 2.4E-08 | 2.2E-08 |
| St. 5 | b | 0-1 | Hadal   | Trench (triple junction) | 1  | 47.5  | 37.5  | EVOH | grain | 0.79 | 1.7E-08 | 1.9E-08 |
| St. 5 | b | 0-1 | Hadal   | Trench (triple junction) | 2  | 95.0  | 80.1  | PE   | grain | 0.84 | 1.5E-07 | 1.5E-07 |
| St. 5 | b | 0-1 | Hadal   | Trench (triple junction) | 3  | 91.1  | 90.0  | PE   | grain | 0.99 | 1.9E-07 | 1.8E-07 |
| St. 5 | b | 0-1 | Hadal   | Trench (triple junction) | 4  | 88.5  | 41.5  | PE   | grain | 0.47 | 3.9E-08 | 3.6E-08 |
| St. 5 | b | 0-1 | Hadal   | Trench (triple junction) | 5  | 66.0  | 23.5  | PE   | grain | 0.36 | 9.2E-09 | 8.7E-09 |
| St. 5 | b | 0-1 | Hadal   | Trench (triple junction) | 6  | 132.9 | 19.7  | PE   | grain | 0.15 | 1.3E-08 | 1.2E-08 |
| St. 5 | b | 0-1 | Hadal   | Trench (triple junction) | 7  | 56.7  | 21.9  | PE   | grain | 0.39 | 6.9E-09 | 6.5E-09 |
| St. 5 | b | 0-1 | Hadal   | Trench (triple junction) | 8  | 125.8 | 60.9  | PE   | grain | 0.48 | 1.2E-07 | 1.1E-07 |
| St. 5 | b | 0-1 | Hadal   | Trench (triple junction) | 9  | 83.2  | 35.7  | PE   | grain | 0.43 | 2.7E-08 | 2.5E-08 |
| St. 5 | b | 0-1 | Hadal   | Trench (triple junction) | 10 | 51.4  | 30.3  | PE   | grain | 0.59 | 1.2E-08 | 1.1E-08 |
| St. 5 | b | 0-1 | Hadal   | Trench (triple junction) | 11 | 82.9  | 40.0  | PE   | grain | 0.48 | 3.4E-08 | 3.2E-08 |
| St. 5 | b | 0-1 | Hadal   | Trench (triple junction) | 12 | 211.2 | 75.6  | EVOH | grain | 0.36 | 3.1E-07 | 3.5E-07 |
| St. 5 | b | 0-1 | Hadal   | Trench (triple junction) | 13 | 254.4 | 51.6  | PET  | grain | 0.20 | 1.7E-07 | 2.3E-07 |
| St. 5 | b | 0-1 | Hadal   | Trench (triple junction) | 14 | 48.9  | 46.1  | PET  | grain | 0.94 | 2.6E-08 | 3.6E-08 |
| St. 5 | b | 0-1 | Hadal   | Trench (triple junction) | 15 | 202.0 | 68.7  | PP   | grain | 0.34 | 2.4E-07 | 2.2E-07 |
| St. 5 | b | 0-1 | Hadal   | Trench (triple junction) | 16 | 21.9  | 15.0  | PP   | grain | 0.68 | 1.2E-09 | 1.1E-09 |
| St. 5 | b | 0-1 | Hadal   | Trench (triple junction) | 17 | 71.2  | 49.2  | PP   | grain | 0.69 | 4.4E-08 | 4.0E-08 |
| St. 5 | b | 0-1 | Hadal   | Trench (triple junction) | 18 | 53.4  | 40.8  | EVOH | grain | 0.76 | 2.3E-08 | 2.6E-08 |
| St. 5 | b | 0-1 | Hadal   | Trench (triple junction) | 19 | 158.7 | 76.4  | PE   | grain | 0.48 | 2.3E-07 | 2.2E-07 |
| St. 5 | b | 0-1 | Hadal   | Trench (triple junction) | 20 | 307.8 | 199.2 | PE   | grain | 0.65 | 3.1E-06 | 2.9E-06 |
| St. 5 | b | 0-1 | Hadal   | Trench (triple junction) | 21 | 53.7  | 41.0  | PE   | grain | 0.76 | 2.3E-08 | 2.2E-08 |
| St. 5 | b | 0-1 | Hadal   | Trench (triple junction) | 22 | 44.7  | 37.5  | PE   | grain | 0.84 | 1.6E-08 | 1.5E-08 |
| St. 5 | b | 0-1 | Hadal   | Trench (triple junction) | 23 | 88.0  | 35.8  | PE   | grain | 0.41 | 2.9E-08 | 2.7E-08 |
| St. 5 | b | 0-1 | Hadal   | Trench (triple junction) | 24 | 160.4 | 154.4 | PE   | grain | 0.96 | 9.7E-07 | 9.1E-07 |
| St. 8 | a | 0-1 | Abyssal | Abyssal plain            | 1  | 47.3  | 39.8  | PE   | grain | 0.84 | 2.8E-08 | 2.6E-08 |
| St. 8 | a | 0-1 | Abyssal | Abyssal plain            | 2  | 45.3  | 32.5  | PP   | grain | 0.72 | 1.8E-08 | 1.6E-08 |

|       |   |     |         |               |    |        |       |      |       |      |         |         |
|-------|---|-----|---------|---------------|----|--------|-------|------|-------|------|---------|---------|
| St. 8 | a | 0-1 | Abyssal | Abyssal plain | 3  | 65.6   | 33.9  | PE   | grain | 0.52 | 2.8E-08 | 2.6E-08 |
| St. 8 | a | 0-1 | Abyssal | Abyssal plain | 4  | 50.0   | 22.4  | PE   | grain | 0.45 | 9.3E-09 | 8.7E-09 |
| St. 8 | a | 0-1 | Abyssal | Abyssal plain | 5  | 48.1   | 25.5  | PE   | grain | 0.53 | 1.2E-08 | 1.1E-08 |
| St. 8 | a | 0-1 | Abyssal | Abyssal plain | 6  | 37.3   | 26.4  | PE   | grain | 0.71 | 9.6E-09 | 9.1E-09 |
| St. 8 | a | 0-1 | Abyssal | Abyssal plain | 7  | 45.1   | 32.0  | PE   | grain | 0.71 | 1.7E-08 | 1.6E-08 |
| St. 8 | a | 0-1 | Abyssal | Abyssal plain | 8  | 22.9   | 10.6  | PE   | grain | 0.46 | 9.5E-10 | 9.0E-10 |
| St. 8 | a | 0-1 | Abyssal | Abyssal plain | 9  | 36.3   | 33.3  | PE   | grain | 0.92 | 1.5E-08 | 1.4E-08 |
| St. 8 | a | 0-1 | Abyssal | Abyssal plain | 10 | 57.6   | 35.9  | PE   | grain | 0.62 | 2.7E-08 | 2.6E-08 |
| St. 8 | a | 0-1 | Abyssal | Abyssal plain | 11 | 1038.7 | 501.7 | PS   | grain | 0.48 | 9.7E-05 | 1.0E-04 |
| St. 8 | b | 0-1 | Abyssal | Abyssal plain | 1  | 42.6   | 35.0  | PA   | grain | 0.82 | 1.9E-08 | 2.2E-08 |
| St. 8 | b | 0-1 | Abyssal | Abyssal plain | 2  | 36.1   | 29.8  | PE   | grain | 0.83 | 1.2E-08 | 1.1E-08 |
| St. 8 | b | 0-1 | Abyssal | Abyssal plain | 3  | 64.8   | 26.8  | PE   | grain | 0.41 | 1.7E-08 | 1.6E-08 |
| St. 8 | b | 0-1 | Abyssal | Abyssal plain | 4  | 15.2   | 11.7  | PE   | grain | 0.77 | 7.7E-10 | 7.2E-10 |
| St. 8 | b | 0-1 | Abyssal | Abyssal plain | 5  | 24.9   | 16.2  | PE   | grain | 0.65 | 2.4E-09 | 2.3E-09 |
| St. 8 | b | 0-1 | Abyssal | Abyssal plain | 6  | 36.3   | 30.2  | PE   | grain | 0.83 | 1.2E-08 | 1.2E-08 |
| St. 8 | b | 0-1 | Abyssal | Abyssal plain | 7  | 49.5   | 21.2  | PE   | grain | 0.43 | 8.2E-09 | 7.8E-09 |
| St. 8 | b | 0-1 | Abyssal | Abyssal plain | 8  | 58.0   | 34.5  | PE   | grain | 0.59 | 2.5E-08 | 2.4E-08 |
| St. 8 | c | 0-1 | Abyssal | Abyssal plain | 1  | 34.5   | 15.0  | PA   | grain | 0.43 | 2.9E-09 | 3.3E-09 |
| St. 8 | c | 0-1 | Abyssal | Abyssal plain | 2  | 19.8   | 19.6  | PE   | grain | 0.99 | 2.8E-09 | 2.6E-09 |
| St. 8 | c | 0-1 | Abyssal | Abyssal plain | 3  | 27.3   | 27.1  | PE   | grain | 0.99 | 7.4E-09 | 7.0E-09 |
| St. 8 | c | 0-1 | Abyssal | Abyssal plain | 4  | 42.4   | 29.9  | PMMA | grain | 0.71 | 1.4E-08 | 1.7E-08 |
| St. 9 | a | 0-1 | Abyssal | Abyssal plain | 1  | 50.9   | 46.6  | PE   | grain | 0.92 | 3.9E-08 | 3.7E-08 |
| St. 9 | a | 0-1 | Abyssal | Abyssal plain | 2  | 32.8   | 26.1  | PE   | grain | 0.80 | 7.9E-09 | 7.4E-09 |
| St. 9 | a | 0-1 | Abyssal | Abyssal plain | 3  | 26.8   | 22.2  | PE   | grain | 0.83 | 4.6E-09 | 4.4E-09 |
| St. 9 | a | 0-1 | Abyssal | Abyssal plain | 4  | 21.8   | 18.6  | PE   | grain | 0.85 | 2.7E-09 | 2.5E-09 |
| St. 9 | a | 0-1 | Abyssal | Abyssal plain | 5  | 106.1  | 61.9  | PE   | grain | 0.58 | 1.4E-07 | 1.3E-07 |
| St. 9 | a | 0-1 | Abyssal | Abyssal plain | 6  | 44.4   | 27.0  | PE   | grain | 0.61 | 1.1E-08 | 1.1E-08 |
| St. 9 | a | 0-1 | Abyssal | Abyssal plain | 7  | 41.3   | 17.1  | PE   | grain | 0.41 | 4.2E-09 | 4.0E-09 |
| St. 9 | a | 0-1 | Abyssal | Abyssal plain | 8  | 32.6   | 24.9  | PE   | grain | 0.76 | 7.1E-09 | 6.7E-09 |

|       |   |     |         |               |    |       |       |    |       |      |         |         |
|-------|---|-----|---------|---------------|----|-------|-------|----|-------|------|---------|---------|
| St. 9 | a | 0-1 | Abyssal | Abyssal plain | 9  | 37.9  | 31.3  | PE | grain | 0.83 | 1.3E-08 | 1.2E-08 |
| St. 9 | a | 0-1 | Abyssal | Abyssal plain | 10 | 49.8  | 33.1  | PE | grain | 0.66 | 1.9E-08 | 1.8E-08 |
| St. 9 | a | 0-1 | Abyssal | Abyssal plain | 11 | 64.8  | 40.9  | PE | grain | 0.63 | 3.8E-08 | 3.6E-08 |
| St. 9 | a | 0-1 | Abyssal | Abyssal plain | 12 | 23.2  | 19.1  | PE | grain | 0.82 | 3.0E-09 | 2.8E-09 |
| St. 9 | a | 0-1 | Abyssal | Abyssal plain | 13 | 32.7  | 20.7  | PE | grain | 0.63 | 4.9E-09 | 4.6E-09 |
| St. 9 | a | 0-1 | Abyssal | Abyssal plain | 14 | 46.7  | 31.9  | PE | grain | 0.68 | 1.7E-08 | 1.6E-08 |
| St. 9 | a | 0-1 | Abyssal | Abyssal plain | 15 | 28.3  | 12.2  | PE | grain | 0.43 | 1.5E-09 | 1.4E-09 |
| St. 9 | a | 0-1 | Abyssal | Abyssal plain | 16 | 46.3  | 32.6  | PE | grain | 0.70 | 1.7E-08 | 1.6E-08 |
| St. 9 | a | 0-1 | Abyssal | Abyssal plain | 17 | 113.7 | 62.3  | PE | grain | 0.55 | 1.6E-07 | 1.5E-07 |
| St. 9 | a | 0-1 | Abyssal | Abyssal plain | 18 | 34.8  | 21.4  | PE | grain | 0.61 | 5.6E-09 | 5.3E-09 |
| St. 9 | a | 0-1 | Abyssal | Abyssal plain | 19 | 48.9  | 33.6  | PE | grain | 0.69 | 1.9E-08 | 1.8E-08 |
| St. 9 | a | 0-1 | Abyssal | Abyssal plain | 20 | 38.7  | 29.0  | PE | grain | 0.75 | 1.1E-08 | 1.1E-08 |
| St. 9 | b | 0-1 | Abyssal | Abyssal plain | 1  | 42.3  | 23.3  | PE | grain | 0.55 | 8.1E-09 | 7.6E-09 |
| St. 9 | b | 0-1 | Abyssal | Abyssal plain | 2  | 48.4  | 43.9  | PE | grain | 0.91 | 3.3E-08 | 3.1E-08 |
| St. 9 | b | 0-1 | Abyssal | Abyssal plain | 3  | 57.1  | 37.9  | PE | grain | 0.66 | 2.9E-08 | 2.7E-08 |
| St. 9 | b | 0-1 | Abyssal | Abyssal plain | 4  | 38.7  | 29.3  | PE | grain | 0.76 | 1.2E-08 | 1.1E-08 |
| St. 9 | b | 0-1 | Abyssal | Abyssal plain | 5  | 41.5  | 26.0  | PE | grain | 0.63 | 9.9E-09 | 9.3E-09 |
| St. 9 | b | 0-1 | Abyssal | Abyssal plain | 6  | 32.1  | 22.5  | PE | grain | 0.70 | 5.7E-09 | 5.4E-09 |
| St. 9 | b | 0-1 | Abyssal | Abyssal plain | 7  | 93.5  | 41.4  | PE | grain | 0.44 | 5.6E-08 | 5.3E-08 |
| St. 9 | b | 0-1 | Abyssal | Abyssal plain | 8  | 30.8  | 17.7  | PE | grain | 0.57 | 3.4E-09 | 3.2E-09 |
| St. 9 | b | 0-1 | Abyssal | Abyssal plain | 9  | 30.5  | 21.5  | PE | grain | 0.70 | 5.0E-09 | 4.7E-09 |
| St. 9 | b | 0-1 | Abyssal | Abyssal plain | 10 | 48.7  | 32.1  | PE | grain | 0.66 | 1.8E-08 | 1.7E-08 |
| St. 9 | b | 0-1 | Abyssal | Abyssal plain | 11 | 45.3  | 20.3  | PE | grain | 0.45 | 6.6E-09 | 6.2E-09 |
| St. 9 | b | 0-1 | Abyssal | Abyssal plain | 12 | 56.1  | 37.8  | PE | grain | 0.67 | 2.8E-08 | 2.7E-08 |
| St. 9 | b | 0-1 | Abyssal | Abyssal plain | 13 | 38.7  | 25.9  | PE | grain | 0.67 | 9.1E-09 | 8.6E-09 |
| St. 9 | b | 0-1 | Abyssal | Abyssal plain | 14 | 52.0  | 36.7  | PE | grain | 0.71 | 2.5E-08 | 2.3E-08 |
| St. 9 | b | 0-1 | Abyssal | Abyssal plain | 15 | 83.7  | 48.3  | PE | grain | 0.58 | 6.9E-08 | 6.5E-08 |
| St. 9 | b | 0-1 | Abyssal | Abyssal plain | 16 | 813.7 | 753.3 | PE | grain | 0.93 | 1.6E-04 | 1.5E-04 |
| St. 9 | c | 0-1 | Abyssal | Abyssal plain | 1  | 57.6  | 43.7  | PA | grain | 0.76 | 3.9E-08 | 4.4E-08 |

|        |   |     |         |               |    |      |      |     |       |      |         |         |
|--------|---|-----|---------|---------------|----|------|------|-----|-------|------|---------|---------|
| St. 9  | c | 0-1 | Abyssal | Abyssal plain | 2  | 74.9 | 52.8 | PE  | grain | 0.70 | 7.3E-08 | 6.9E-08 |
| St. 9  | c | 0-1 | Abyssal | Abyssal plain | 3  | 63.5 | 38.9 | PE  | grain | 0.61 | 3.4E-08 | 3.2E-08 |
| St. 9  | c | 0-1 | Abyssal | Abyssal plain | 5  | 59.0 | 26.6 | PET | grain | 0.45 | 1.5E-08 | 2.0E-08 |
| St. 10 | a | 0-1 | Abyssal | Abyssal plain | 1  | 98.1 | 34.5 | PA  | grain | 0.35 | 4.2E-08 | 4.8E-08 |
| St. 10 | a | 0-1 | Abyssal | Abyssal plain | 2  | 60.1 | 25.2 | PE  | grain | 0.42 | 1.4E-08 | 1.3E-08 |
| St. 10 | a | 0-1 | Abyssal | Abyssal plain | 3  | 52.2 | 44.6 | PE  | grain | 0.85 | 3.8E-08 | 3.6E-08 |
| St. 10 | a | 0-1 | Abyssal | Abyssal plain | 4  | 48.2 | 43.7 | PE  | grain | 0.91 | 3.3E-08 | 3.2E-08 |
| St. 10 | a | 0-1 | Abyssal | Abyssal plain | 5  | 46.2 | 37.7 | PE  | grain | 0.82 | 2.4E-08 | 2.2E-08 |
| St. 10 | a | 0-1 | Abyssal | Abyssal plain | 6  | 26.7 | 24.6 | PE  | grain | 0.92 | 5.9E-09 | 5.5E-09 |
| St. 10 | a | 0-1 | Abyssal | Abyssal plain | 7  | 33.4 | 26.8 | PE  | grain | 0.80 | 8.7E-09 | 8.2E-09 |
| St. 10 | a | 0-1 | Abyssal | Abyssal plain | 8  | 18.3 | 17.2 | PE  | grain | 0.94 | 2.0E-09 | 1.9E-09 |
| St. 10 | a | 0-1 | Abyssal | Abyssal plain | 9  | 31.6 | 19.8 | PE  | grain | 0.63 | 4.5E-09 | 4.2E-09 |
| St. 10 | a | 0-1 | Abyssal | Abyssal plain | 10 | 72.1 | 34.0 | PE  | grain | 0.47 | 3.0E-08 | 2.9E-08 |
| St. 10 | a | 0-1 | Abyssal | Abyssal plain | 11 | 50.4 | 26.4 | PE  | grain | 0.52 | 1.3E-08 | 1.2E-08 |
| St. 10 | a | 0-1 | Abyssal | Abyssal plain | 12 | 49.9 | 40.3 | PA  | grain | 0.81 | 2.9E-08 | 3.4E-08 |
| St. 10 | a | 0-1 | Abyssal | Abyssal plain | 13 | 51.0 | 33.3 | PE  | grain | 0.65 | 2.1E-08 | 1.9E-08 |
| St. 10 | a | 0-1 | Abyssal | Abyssal plain | 14 | 46.9 | 26.7 | PP  | grain | 0.57 | 1.2E-08 | 1.1E-08 |
| St. 10 | a | 0-1 | Abyssal | Abyssal plain | 15 | 24.9 | 20.8 | PE  | grain | 0.84 | 3.9E-09 | 3.7E-09 |
| St. 10 | a | 0-1 | Abyssal | Abyssal plain | 16 | 46.5 | 22.0 | PE  | grain | 0.47 | 8.2E-09 | 7.7E-09 |
| St. 10 | a | 0-1 | Abyssal | Abyssal plain | 17 | 29.6 | 28.8 | PE  | grain | 0.97 | 8.9E-09 | 8.4E-09 |
| St. 10 | a | 0-1 | Abyssal | Abyssal plain | 18 | 63.4 | 52.7 | PE  | grain | 0.83 | 6.4E-08 | 6.0E-08 |
| St. 10 | a | 0-1 | Abyssal | Abyssal plain | 19 | 52.4 | 41.2 | PE  | grain | 0.79 | 3.2E-08 | 3.0E-08 |
| St. 10 | a | 0-1 | Abyssal | Abyssal plain | 20 | 37.1 | 28.6 | PE  | grain | 0.77 | 1.1E-08 | 1.0E-08 |
| St. 10 | a | 0-1 | Abyssal | Abyssal plain | 21 | 29.7 | 25.6 | PE  | grain | 0.86 | 7.1E-09 | 6.7E-09 |
| St. 10 | b | 0-1 | Abyssal | Abyssal plain | 1  | 52.0 | 37.6 | PA  | grain | 0.72 | 2.7E-08 | 3.0E-08 |
| St. 10 | b | 0-1 | Abyssal | Abyssal plain | 2  | 38.7 | 28.9 | PE  | grain | 0.75 | 1.2E-08 | 1.1E-08 |
| St. 10 | b | 0-1 | Abyssal | Abyssal plain | 3  | 38.8 | 26.2 | PE  | grain | 0.68 | 9.7E-09 | 9.1E-09 |
| St. 10 | b | 0-1 | Abyssal | Abyssal plain | 4  | 44.1 | 16.8 | PE  | grain | 0.38 | 4.5E-09 | 4.3E-09 |
| St. 10 | b | 0-1 | Abyssal | Abyssal plain | 5  | 37.9 | 25.5 | PE  | grain | 0.67 | 8.9E-09 | 8.4E-09 |



|        |   |     |         |               |    |       |      |    |       |      |         |         |
|--------|---|-----|---------|---------------|----|-------|------|----|-------|------|---------|---------|
| St. 10 | b | 0-1 | Abyssal | Abyssal plain | 6  | 57.2  | 39.8 | PE | grain | 0.70 | 3.3E-08 | 3.1E-08 |
| St. 10 | b | 0-1 | Abyssal | Abyssal plain | 7  | 51.7  | 26.4 | PE | grain | 0.51 | 1.3E-08 | 1.2E-08 |
| St. 10 | b | 0-1 | Abyssal | Abyssal plain | 8  | 140.4 | 69.4 | PE | grain | 0.49 | 2.5E-07 | 2.3E-07 |
| St. 10 | b | 0-1 | Abyssal | Abyssal plain | 9  | 82.2  | 56.8 | PE | grain | 0.69 | 9.6E-08 | 9.1E-08 |
| St. 10 | b | 0-1 | Abyssal | Abyssal plain | 10 | 54.8  | 28.9 | PE | grain | 0.53 | 1.7E-08 | 1.6E-08 |
| St. 10 | b | 0-1 | Abyssal | Abyssal plain | 11 | 51.8  | 30.0 | PE | grain | 0.58 | 1.7E-08 | 1.6E-08 |
| St. 10 | b | 0-1 | Abyssal | Abyssal plain | 12 | 60.5  | 32.9 | PA | grain | 0.54 | 2.4E-08 | 2.7E-08 |
| St. 10 | b | 0-1 | Abyssal | Abyssal plain | 13 | 71.4  | 28.0 | PE | grain | 0.39 | 2.0E-08 | 1.9E-08 |
| St. 10 | b | 0-1 | Abyssal | Abyssal plain | 14 | 36.4  | 29.2 | PE | grain | 0.80 | 1.1E-08 | 1.1E-08 |
| St. 10 | b | 0-1 | Abyssal | Abyssal plain | 15 | 44.7  | 40.3 | PE | grain | 0.90 | 2.6E-08 | 2.5E-08 |
| St. 10 | b | 0-1 | Abyssal | Abyssal plain | 16 | 71.1  | 39.2 | PE | grain | 0.55 | 4.0E-08 | 3.7E-08 |
| St. 10 | b | 0-1 | Abyssal | Abyssal plain | 17 | 28.0  | 25.4 | PE | grain | 0.91 | 6.6E-09 | 6.2E-09 |
| St. 10 | b | 0-1 | Abyssal | Abyssal plain | 18 | 71.2  | 38.7 | PE | grain | 0.54 | 3.9E-08 | 3.7E-08 |
| St. 10 | b | 0-1 | Abyssal | Abyssal plain | 19 | 62.9  | 47.6 | PE | grain | 0.76 | 5.2E-08 | 4.9E-08 |
| St. 10 | b | 0-1 | Abyssal | Abyssal plain | 20 | 83.9  | 38.8 | PE | grain | 0.46 | 4.6E-08 | 4.3E-08 |
| St. 10 | b | 0-1 | Abyssal | Abyssal plain | 21 | 45.6  | 26.0 | PE | grain | 0.57 | 1.1E-08 | 1.1E-08 |
| St. 10 | b | 0-1 | Abyssal | Abyssal plain | 22 | 62.4  | 22.7 | PE | grain | 0.36 | 1.2E-08 | 1.1E-08 |
| St. 10 | b | 0-1 | Abyssal | Abyssal plain | 23 | 109.2 | 66.7 | PA | grain | 0.61 | 1.8E-07 | 2.0E-07 |
| St. 10 | b | 0-1 | Abyssal | Abyssal plain | 24 | 45.0  | 36.9 | PE | grain | 0.82 | 2.2E-08 | 2.1E-08 |
| St. 10 | b | 0-1 | Abyssal | Abyssal plain | 25 | 21.5  | 15.7 | PE | grain | 0.73 | 1.9E-09 | 1.8E-09 |
| St. 10 | b | 0-1 | Abyssal | Abyssal plain | 26 | 15.5  | 13.8 | PE | grain | 0.89 | 1.1E-09 | 1.0E-09 |
| St. 10 | b | 0-1 | Abyssal | Abyssal plain | 27 | 27.0  | 19.8 | PE | grain | 0.73 | 3.8E-09 | 3.6E-09 |
| St. 10 | b | 0-1 | Abyssal | Abyssal plain | 28 | 49.1  | 36.1 | PE | grain | 0.74 | 2.3E-08 | 2.2E-08 |
| St. 10 | b | 0-1 | Abyssal | Abyssal plain | 29 | 47.0  | 35.5 | PE | grain | 0.76 | 2.2E-08 | 2.0E-08 |
| St. 10 | b | 0-1 | Abyssal | Abyssal plain | 30 | 35.2  | 20.0 | PE | grain | 0.57 | 5.1E-09 | 4.8E-09 |
| St. 10 | b | 0-1 | Abyssal | Abyssal plain | 32 | 97.2  | 47.6 | PE | grain | 0.49 | 8.0E-08 | 7.5E-08 |
| St. 10 | b | 0-1 | Abyssal | Abyssal plain | 33 | 63.5  | 45.4 | PE | grain | 0.71 | 4.8E-08 | 4.5E-08 |
| St. 10 | b | 0-1 | Abyssal | Abyssal plain | 34 | 16.4  | 11.0 | PE | grain | 0.67 | 7.2E-10 | 6.8E-10 |
| St. 10 | b | 0-1 | Abyssal | Abyssal plain | 35 | 30.4  | 28.2 | PE | grain | 0.93 | 8.8E-09 | 8.3E-09 |

|        |   |     |         |               |    |       |       |    |       |      |         |         |
|--------|---|-----|---------|---------------|----|-------|-------|----|-------|------|---------|---------|
| St. 10 | b | 0-1 | Abyssal | Abyssal plain | 36 | 73.0  | 34.8  | PE | grain | 0.48 | 3.2E-08 | 3.0E-08 |
| St. 10 | b | 0-1 | Abyssal | Abyssal plain | 37 | 36.3  | 24.5  | PE | grain | 0.67 | 7.9E-09 | 7.5E-09 |
| St. 10 | c | 0-1 | Abyssal | Abyssal plain | 1  | 180.0 | 164.4 | PA | grain | 0.91 | 1.8E-06 | 2.0E-06 |
| St. 10 | c | 0-1 | Abyssal | Abyssal plain | 2  | 112.3 | 99.6  | PA | grain | 0.89 | 4.0E-07 | 4.6E-07 |
| St. 10 | c | 0-1 | Abyssal | Abyssal plain | 3  | 52.3  | 30.5  | PE | grain | 0.58 | 1.8E-08 | 1.7E-08 |

Table S15. Summary and calculated microplastic (MP) mass in sediment samples from the western North Pacific as reported by Tsuchiya<sup>7</sup>

| Station | Latitude (N),<br>longitude (E) | Area                          | Sediment<br>layer<br>(cm) | Years of<br>accumulation | Particle<br>size range<br>( $\mu\text{m}$ ) | Aspect ratio<br>(Mean $\pm$<br>S.D.) | Median<br>aspect<br>ratio | Shannon<br>diversity ( $H'$ )<br>(Mean $\pm$ S.D.) | Buoyant<br>polymer<br>(%) | Dense<br>polymer<br>(%) | MP abundance<br>range<br>( $\times 10^4$ pieces $\text{m}^{-2}$ ) | Calculated MP<br>mass range<br>( $\text{mg m}^{-2}$ ) |
|---------|--------------------------------|-------------------------------|---------------------------|--------------------------|---------------------------------------------|--------------------------------------|---------------------------|----------------------------------------------------|---------------------------|-------------------------|-------------------------------------------------------------------|-------------------------------------------------------|
| St. 1   | 35°00.9540',<br>139°13.3250'   | Bathyal<br>(Sagami<br>Bay)    | 0–1                       | 3–4                      | 31–235<br>(101 $\pm$ 53)                    | 0.49 $\pm$ 0.16                      | 0.51                      | 1.4 $\pm$ 0.2                                      | 89                        | 11                      | 1.3–2.4<br>(1.9 $\pm$ 0.5)                                        | 1.5–4.6<br>(2.5 $\pm$ 1.5)                            |
| St. 2   | 35°01.1484',<br>139°22.6592'   | Bathyal<br>(Sagami<br>Bay)    | 0–1                       | 3–4                      | 20–335<br>(70 $\pm$ 54)                     | 0.59 $\pm$ 0.19                      | 0.59                      | 2.3 $\pm$ 0.2                                      | 64                        | 36                      | 2.5–5.8<br>(4.1 $\pm$ 1.4)                                        | 3.6–16<br>(8.1 $\pm$ 5.6)                             |
| St. 4   | 34°20.4296',<br>142°00.6006'   | Hadal<br>(Triple<br>junction) | 0–1                       | 15                       | 34–224<br>(73 $\pm$ 43)                     | 0.55 $\pm$ 0.19                      | 0.52                      | 2.3 $\pm$ 0.3                                      | 58                        | 42                      | 1.5–3.3<br>(2.4 $\pm$ 0.9)                                        | 0.28–3.2<br>(1.7 $\pm$ 1.4)                           |
| St. 5   | 33°46.4374',<br>141°56.1556'   | Hadal<br>(Triple<br>junction) | 0–1                       | 15                       | 22–308<br>(101 $\pm$ 73)                    | 0.56 $\pm$ 0.22                      | 0.48                      | 1.7 $\pm$ 0.3                                      | 80                        | 20                      | 1.3–2.8<br>(2.1 $\pm$ 0.8)                                        | 1.9–6.5<br>(4.2 $\pm$ 2.3)                            |
| St. 8   | 33°00.2359',<br>145°00.7300'   | Abyssal<br>(Abyssal<br>plain) | 0–1                       | 463–614                  | 15–1039<br>(85 $\pm$ 204)                   | 0.67 $\pm$ 0.18                      | 0.71                      | 0.8 $\pm$ 0.5                                      | 81                        | 19                      | 37.9–94.7<br>(69.5 $\pm$ 23.6)                                    | 2.8–34<br>(15 $\pm$ 13)                               |
| St. 9   | 34°45.2560',<br>144°59.7032'   | Abyssal<br>(Abyssal<br>plain) | 0–1                       | 463–614                  | 22–814<br>(68 $\pm$ 121)                    | 0.67 $\pm$ 0.13                      | 0.67                      | 0.5 $\pm$ 0.7                                      | 95                        | 5                       | 37.9–189.5<br>(123.2 $\pm$ 63.3)                                  | 16–57<br>(40 $\pm$ 18)                                |
| St. 10  | 35°55.7558',<br>144°58.3896'   | Abyssal<br>(Abyssal<br>plain) | 0–1                       | 463–614                  | 16–180<br>(54 $\pm$ 29)                     | 0.68 $\pm$ 0.17                      | 0.69                      | 0.7 $\pm$ 0.2                                      | 89                        | 11                      | 28.9–341.0<br>(189.6 $\pm$ 127.6)                                 | 38–236<br>(129 $\pm$ 82)                              |

Table S16. Annual global polymer resin production as reported by Geyer et al.<sup>8</sup> and estimated microplastic mass flux at Stn. KEO

| Year | Annual global polymer resin production (million tons) | Percentage of production in 2015 | Estimated microplastic mass flux at St. KEO (mg m <sup>-2</sup> year <sup>-1</sup> ) |
|------|-------------------------------------------------------|----------------------------------|--------------------------------------------------------------------------------------|
| 2015 | 381                                                   | 100                              | 20                                                                                   |
| 2014 | 367                                                   | 96.3                             | 19                                                                                   |
| 2013 | 352                                                   | 92.4                             | 18                                                                                   |
| 2012 | 338                                                   | 88.7                             | 17                                                                                   |
| 2011 | 325                                                   | 85.3                             | 17                                                                                   |
| 2010 | 313                                                   | 82.2                             | 16                                                                                   |
| 2009 | 288                                                   | 75.6                             | 15                                                                                   |
| 2008 | 281                                                   | 73.8                             | 15                                                                                   |
| 2007 | 295                                                   | 77.4                             | 15                                                                                   |
| 2006 | 280                                                   | 73.5                             | 14                                                                                   |
| 2005 | 263                                                   | 69.0                             | 14                                                                                   |
| 2004 | 256                                                   | 67.2                             | 13                                                                                   |
| 2003 | 241                                                   | 63.3                             | 12                                                                                   |
| 2002 | 231                                                   | 60.6                             | 12                                                                                   |
| 2001 | 218                                                   | 57.2                             | 11                                                                                   |
| 2000 | 213                                                   | 55.9                             | 11                                                                                   |
| 1999 | 202                                                   | 53.0                             | 10                                                                                   |
| 1998 | 188                                                   | 49.3                             | 10                                                                                   |
| 1997 | 180                                                   | 47.2                             | 9.3                                                                                  |
| 1996 | 168                                                   | 44.1                             | 8.7                                                                                  |
| 1995 | 156                                                   | 40.9                             | 8.1                                                                                  |
| 1994 | 151                                                   | 39.6                             | 7.8                                                                                  |
| 1993 | 137                                                   | 36.0                             | 7.1                                                                                  |
| 1992 | 132                                                   | 34.6                             | 6.8                                                                                  |
| 1991 | 124                                                   | 32.5                             | 6.4                                                                                  |
| 1990 | 120                                                   | 31.5                             | 6.2                                                                                  |
| 1989 | 114                                                   | 29.9                             | 5.9                                                                                  |
| 1988 | 110                                                   | 28.9                             | 5.7                                                                                  |
| 1987 | 104                                                   | 27.3                             | 5.4                                                                                  |
| 1986 | 96                                                    | 25.2                             | 5.0                                                                                  |
| 1985 | 90                                                    | 23.6                             | 4.7                                                                                  |
| 1984 | 86                                                    | 22.6                             | 4.4                                                                                  |
| 1983 | 80                                                    | 21.0                             | 4.1                                                                                  |
| 1982 | 73                                                    | 19.2                             | 3.8                                                                                  |
| 1981 | 72                                                    | 18.9                             | 3.7                                                                                  |
| 1980 | 70                                                    | 18.4                             | 3.6                                                                                  |
| 1979 | 71                                                    | 18.6                             | 3.7                                                                                  |
| 1978 | 64                                                    | 16.8                             | 3.3                                                                                  |
| 1977 | 59                                                    | 15.5                             | 3.1                                                                                  |
| 1976 | 54                                                    | 14.2                             | 2.8                                                                                  |

|       |      |      |      |
|-------|------|------|------|
| 1975  | 46   | 12.1 | 2.4  |
| 1974  | 52   | 13.6 | 2.7  |
| 1973  | 51   | 13.4 | 2.6  |
| 1972  | 44   | 11.5 | 2.3  |
| 1971  | 38   | 10.0 | 2.0  |
| 1970  | 35   | 9.2  | 1.8  |
| 1969  | 32   | 8.4  | 1.7  |
| 1968  | 27   | 7.1  | 1.4  |
| 1967  | 23   | 6.0  | 1.2  |
| 1966  | 20   | 5.2  | 1.0  |
| 1965  | 17   | 4.5  | 0.88 |
| 1964  | 15   | 3.9  | 0.78 |
| 1963  | 13   | 3.4  | 0.67 |
| 1962  | 11   | 2.9  | 0.57 |
| 1961  | 9    | 2.4  | 0.47 |
| 1960  | 8    | 2.1  | 0.41 |
| 1959  | 7    | 1.8  | 0.36 |
| 1958  | 6    | 1.6  | 0.31 |
| 1957  | 5    | 1.3  | 0.26 |
| 1956  | 5    | 1.3  | 0.26 |
| 1955  | 4    | 1.0  | 0.21 |
| 1954  | 3    | 0.8  | 0.16 |
| 1953  | 3    | 0.8  | 0.16 |
| 1952  | 2    | 0.5  | 0.10 |
| 1951  | 2    | 0.5  | 0.10 |
| 1950  | 2    | 0.5  | 0.10 |
| Total | 7823 |      | 405  |

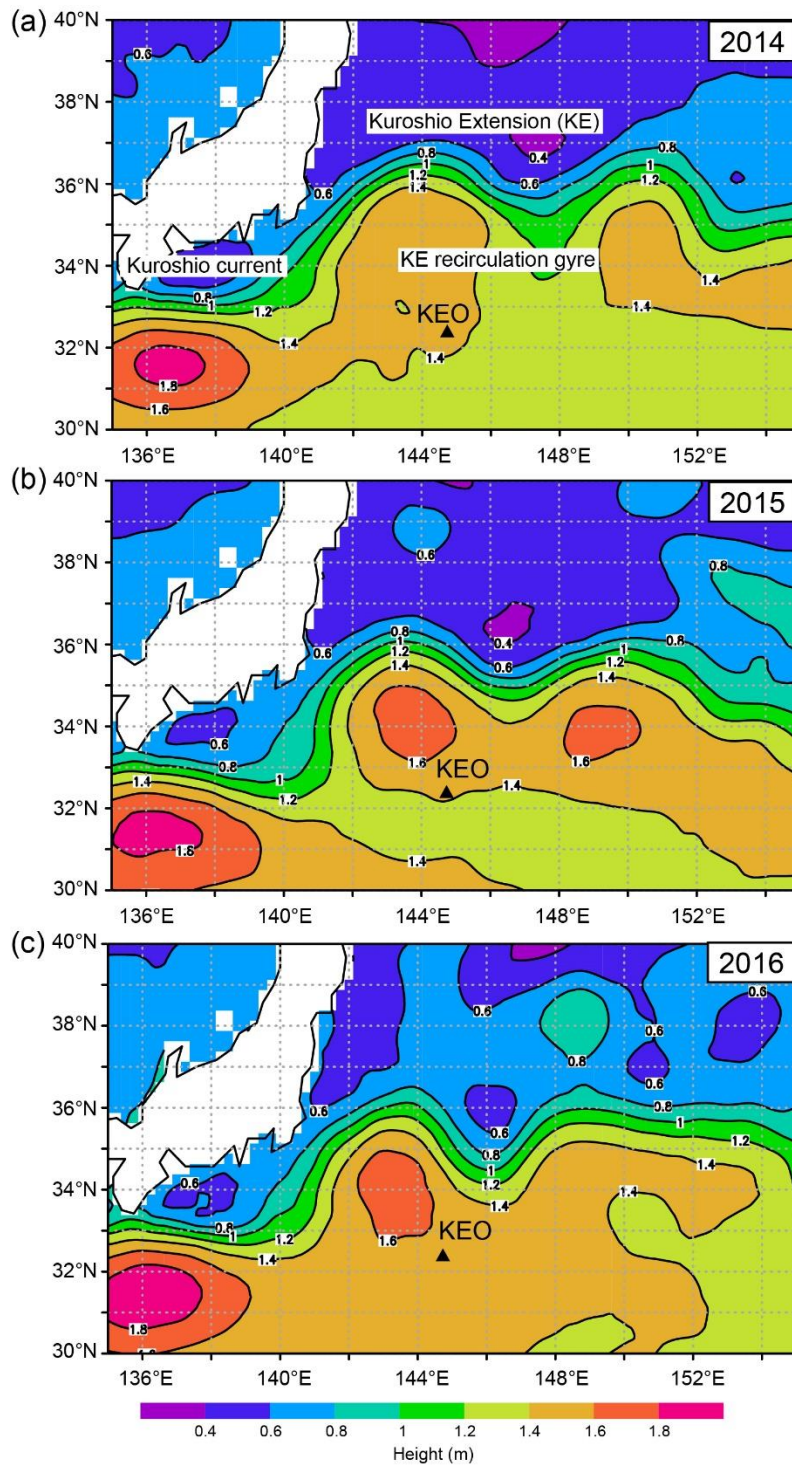

Figure S1. The Kuroshio Current, Kuroshio Extension (KE), and associated recirculation gyre at the study site. Contours and colors represent annual averaged absolute dynamic topography in (a) 2014, (b) 2015, and (c) 2016. The black triangle shows the location of Stn. KEO.

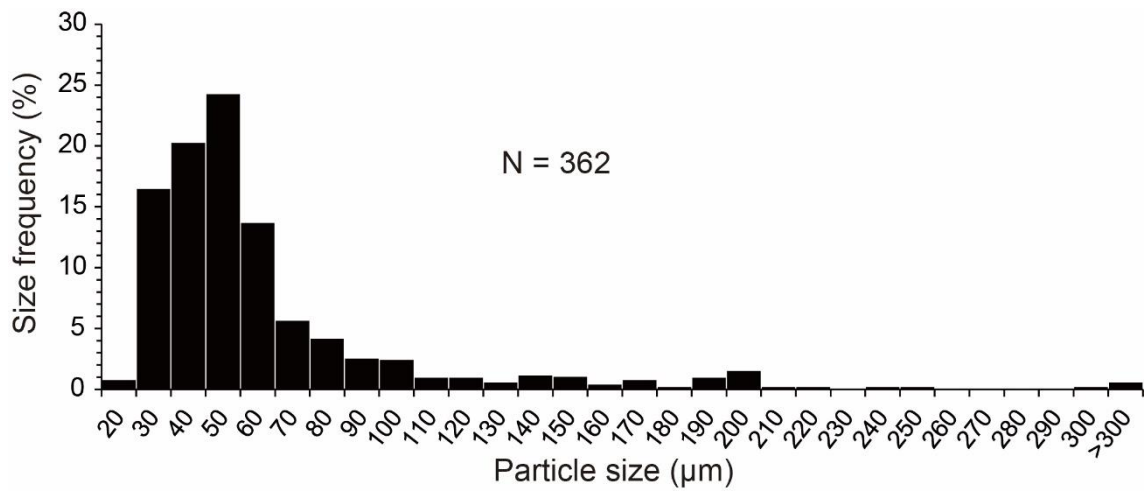

Figure S2. Relative microplastic particle size distribution at Stn. KEO.

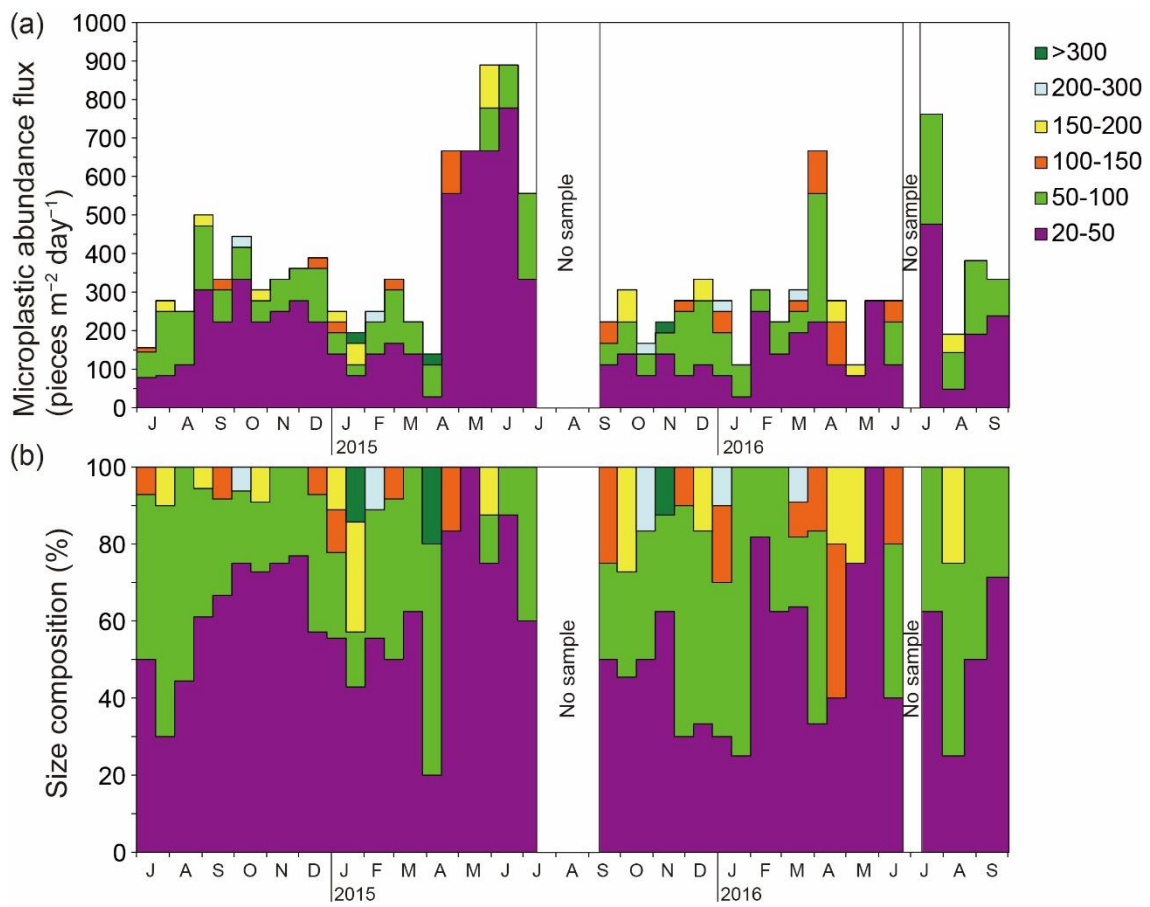

Figure S3. Time-series of microplastic abundance fluxes at Stn. KEO. (a) Microplastic abundance fluxes. (b) Size composition by number of particles.



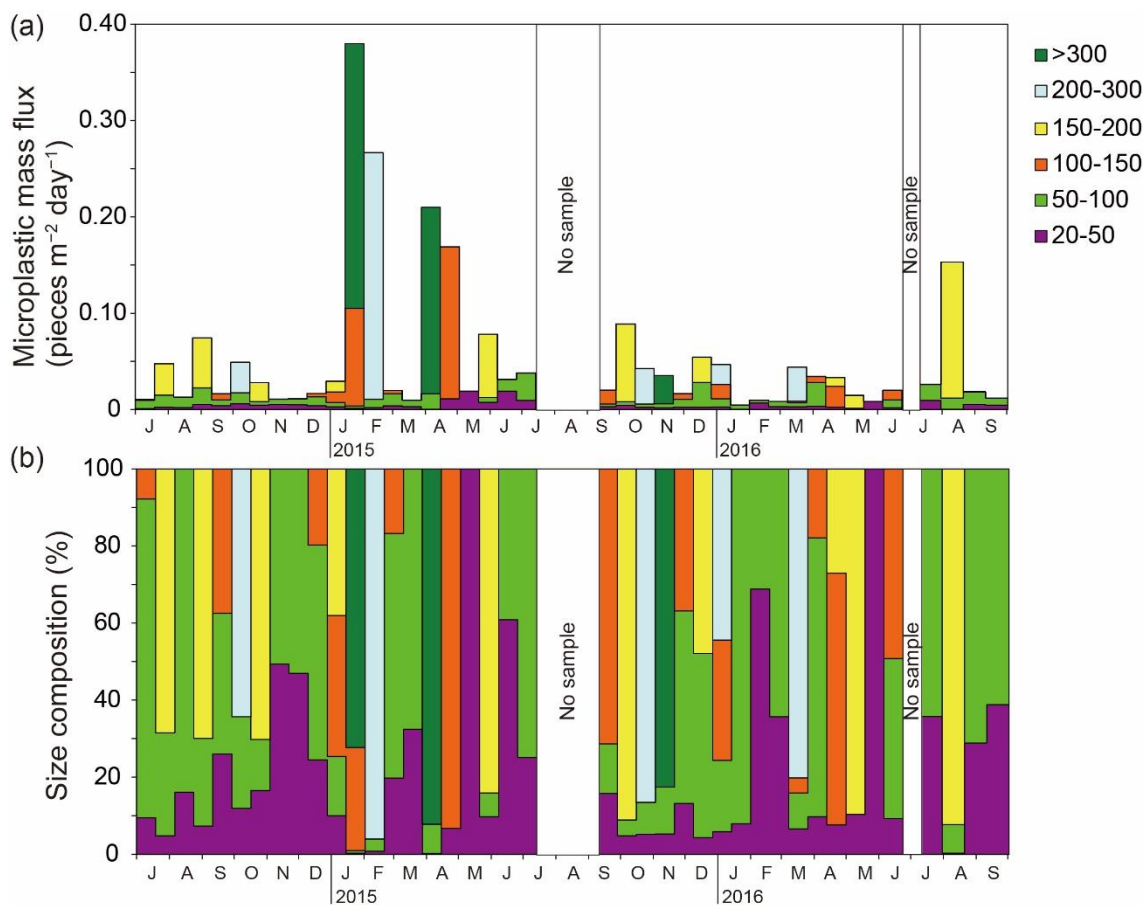

Figure S4. Time-series of microplastic mass fluxes at Stn. KEO. (a) Microplastic mass fluxes. (b) Size composition by mass.

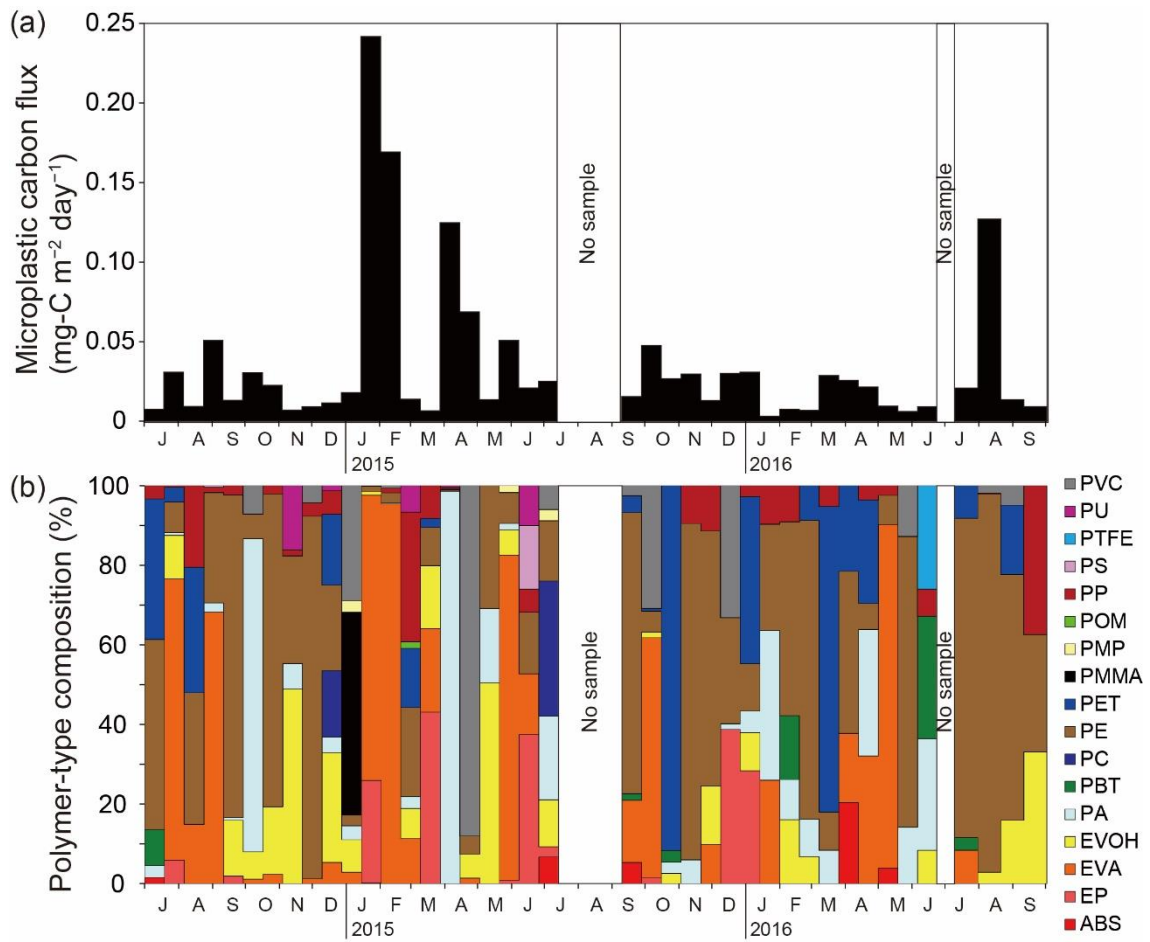

Figure S5. Time-series data of microplastic carbon fluxes at Stn. KEO. (a) Microplastic carbon fluxes. (b) Polymer-type composition by mass of carbon. Polymer-type abbreviations are as shown in Table S1.

## SI References

- (1) Behrenfeld, M. J.; Falkowski, P. G. Photosynthetic rates derived from satellite-based chlorophyll concentration. *Limnol. Oceanogr.* **1997** 42(1), 1–20.
- (2) Omnexus. Density of plastics: Technical properties, **2023**. <https://omnexus.specialchem.com/polymer-properties/properties/density> Accessed on August 31, 2023.
- (3) Resin Library. What is Epoxy Resin, **2023**. <https://www.resinlibrary.com/knowledge/article/epoxy-resin/> Accessed on August 31, 2023.
- (4) Scientific Polymer Products Inc. Density of Polymers (By Density), **2019**. <https://scipoly.com/density-of-polymers-by-density/> Accessed on January 15, 2024.
- (5) Ji-Horng Plastic. Plastic Material: Density & Specific Gravity, **2023**. <https://www.ji-horng.com/plastic-material-density-specific-gravity> Accessed on August 31, 2023.
- (6) Reineccius, J.; Waniek, J. J. First long-term evidence of microplastic pollution in the deep subtropical Northeast Atlantic. *Environ. Pollut.* **2022**, 305, 119302.
- (7) Tsuchiya, M.; Kitahashi, T.; Nakajima, R.; Oguri, K.; Kawamura, K.; Nakamura, A.; Nakano, K.; Maeda, Y.; Murayama, M.; Chiba, S.; Fujikura, K. Distribution of microplastics in bathyal-to hadal-depth sediments and transport process along the deep-sea canyon and the Kuroshio Extension in the Northwest Pacific. *Mar. Pollut. Bull.* **2024**, 199, 115466.
- (8) Geyer, R.; Jambeck, J. R.; Law, K. L. Production, use, and fate of all plastics ever made. *Sci. Adv.* **2017**, 3 (7), e1700782.
